# Supplementary material for: A new class of anticancer activity with computational studies for a novel bioactive aminophosphonates based on pyrazole moiety
Source: PubMed Central journal article supplement (PMC10482913; doi:10.1038/s41598-023-40265-8), 2023-09-06
Supplement: 41598_2023_40265_MOESM1_ESM.pdf [file 41598_2023_40265_MOESM1_ESM.pdf]

# Supplementary Material

## A new class of anticancer activity with computational studies and molecular docking simulation for a novel bioactive aminophosphonates based on pyrazole moiety

Mohamed H. Baren<sup>a</sup>, Seham A.Ibrahim<sup>a\*</sup>, Munirah M. Al-Rooqi<sup>b</sup>, Saleh A. Ahmed<sup>b\*\*</sup>,  
Mohammed M. El-Gamil<sup>c</sup>, Hend A. Hekal<sup>a</sup>

<sup>a</sup> Chemistry Department, Faculty of Science, Tanta University, 31527, Egypt

<sup>b</sup> Department of Chemistry, Faculty of Applied Sciences, Umm Al-Qura University, Makkah 21955, Saudi Arabia

<sup>c</sup> Department of Toxic and Narcotic Drug, Forensic Medicine, Mansoura Laboratory, Medico legal Organization, Ministry of Justice, Mansoura, Egypt

### Materials and instrumentation (Section S1)

Unless otherwise stated, all reagents of analytical grade were purchased from Sigma-Aldrich and were used without further purification. All melting points were measured without corrections on a Gallenkamp melting point apparatus. The Fourier transform infrared spectroscopy (FTIR) spectra were recorded on a Perkin-Elmer FTIR 1430 spectrophotometer using KBr disk technique. The <sup>1</sup>H nuclear magnetic resonance (NMR) spectra were recorded on a Bruker AC spectrometer (400 MHz) at 25°C in DMSO-d<sub>6</sub> with TMS as an internal standard, and chemical shifts are reported in parts per million as δ values; <sup>13</sup>C NMR was set at 101 MHz. Mass spectra were measured on a Finnigan MAT 8222 EX electron impact mass spectrometer (EIMS) at 70 eV. Elemental analyses for C, H, and N were also carried out at the Regional Center for Mycology and Biotechnology, Azhar University, and the values were found to be within 0.4% of the theoretical ones unless otherwise indicated. Reaction progress was monitored by thin-layer chromatography using benzene/ethylacetate (3/1 by volume) as eluent.

### Cytotoxicity Assay (Section S2)

The cell lines Human lung fibroblast (WI38), Colorectal carcinoma Colon cancer (HCT-116) and Epidermoid Carcinoma (HEP2) were used to determine the inhibitory effects of compounds on cell growth using the MTT assay. This colorimetric assay is based on the conversion of the yellow tetrazolium bromide (MTT) to a purple formazan derivative by mitochondrial succinate dehydrogenase in viable cells. Cell lines were cultured in RPMI-1640 medium with 10% fetal bovine serum. Antibiotics added were 100 units/ml penicillin and 100µg/ml streptomycin at 37 C in a 5% Co<sub>2</sub> incubator. The cell lines were seeded in a 96-well plate at a density of 1.0x10<sup>4</sup> cells/well. At 37 C for 48 h under 5% CO<sub>2</sub>. After incubation the cells were treated with different concentration of compounds and incubated for 24 h. After 24 h of drug treatment, 20 µl of MTT solution at

5mg/ml was added and incubated for 4 h. Dimethyl sulfoxide (DMSO) in volume of 100  $\mu$ l is added into each well to dissolve the purple formazan formed. The colorimetric assay is measured and recorded at absorbance of 570 nm using a plate reader (EXL 800, USA). The relative cell viability in percentage was calculated as  $(A_{570} \text{ of treated samples} / A_{570} \text{ of untreated sample}) \times 100$ .

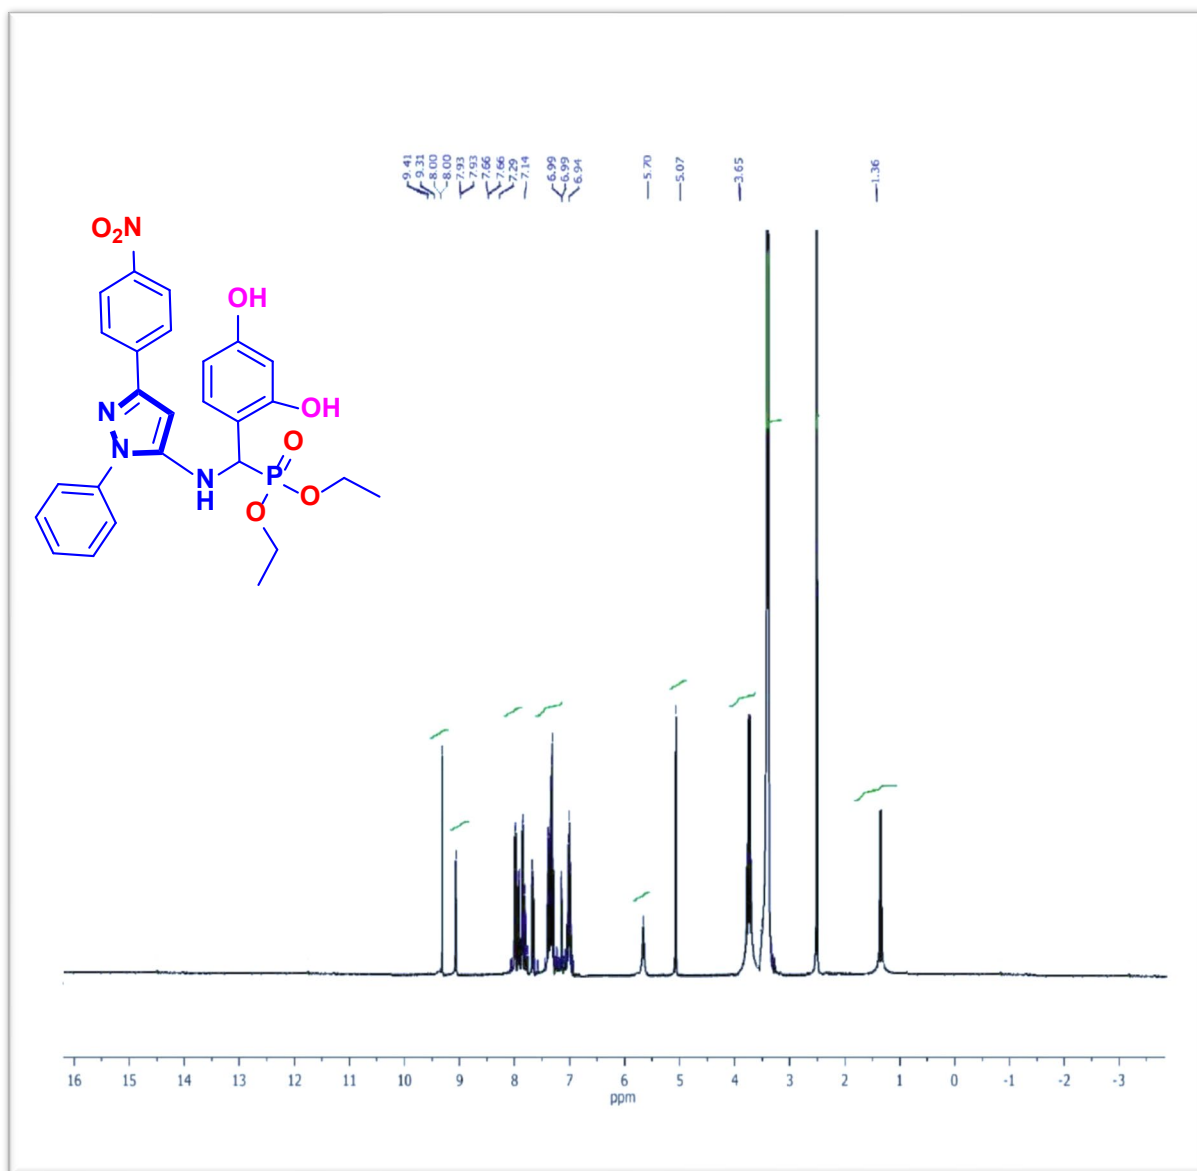

**Fig. S1.**  $^1\text{H-NMR}$  spectrum of  $\alpha$ -aminophosphonate **2a**.

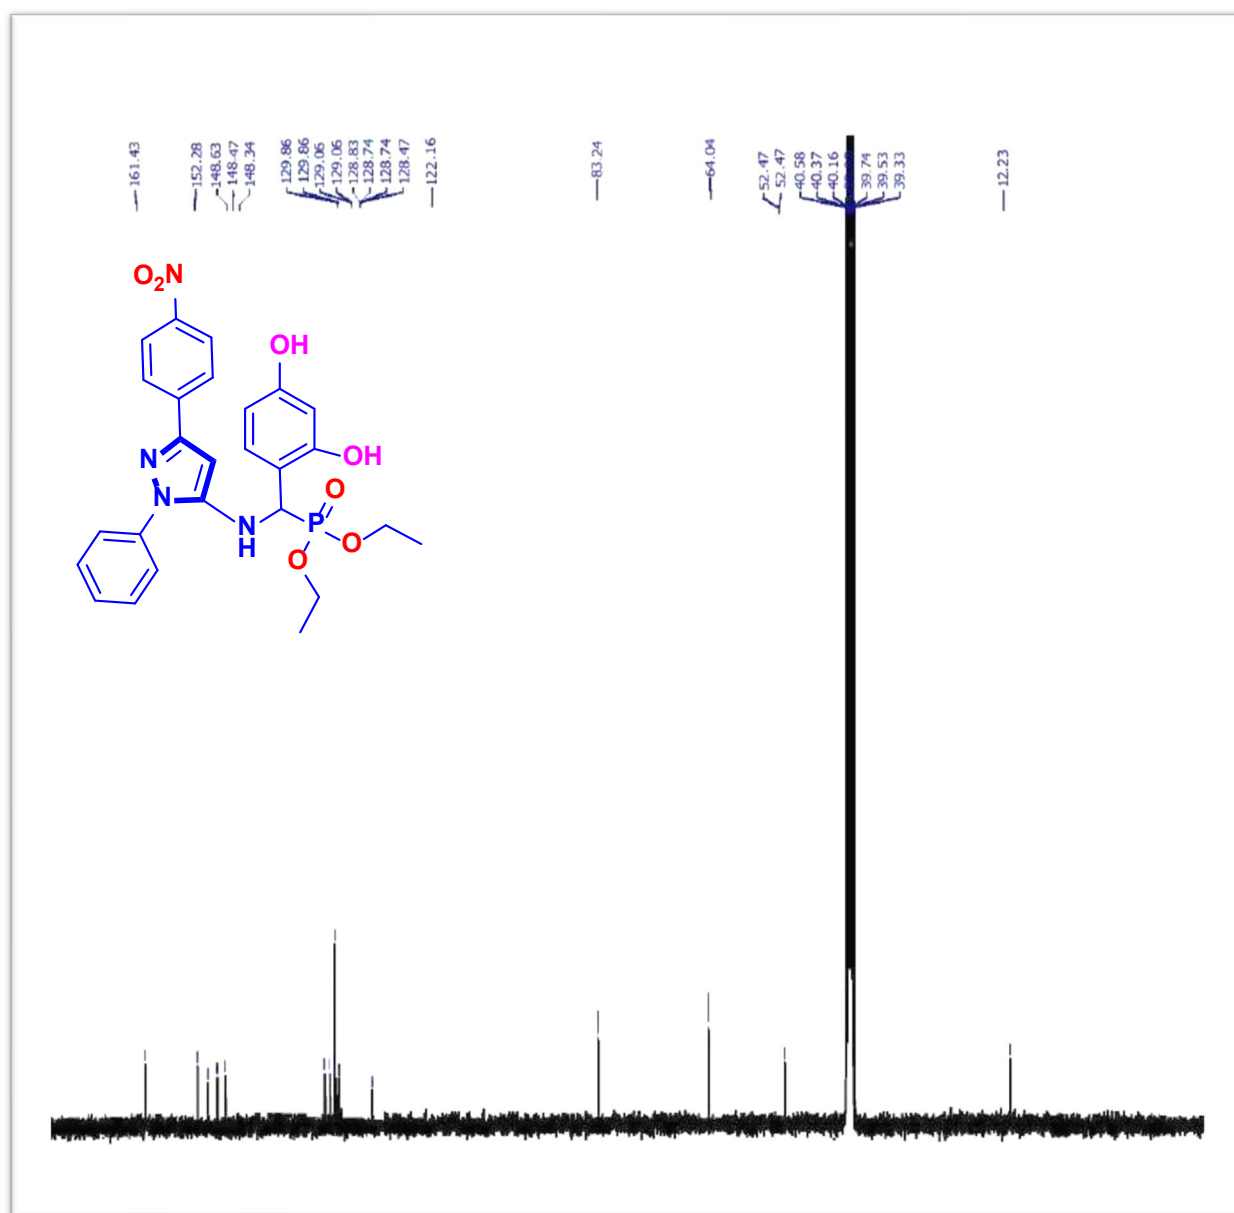

Fig. S2.  $^{13}\text{C}$ -NMR spectrum of  $\alpha$ -aminophosphonate **2a**.

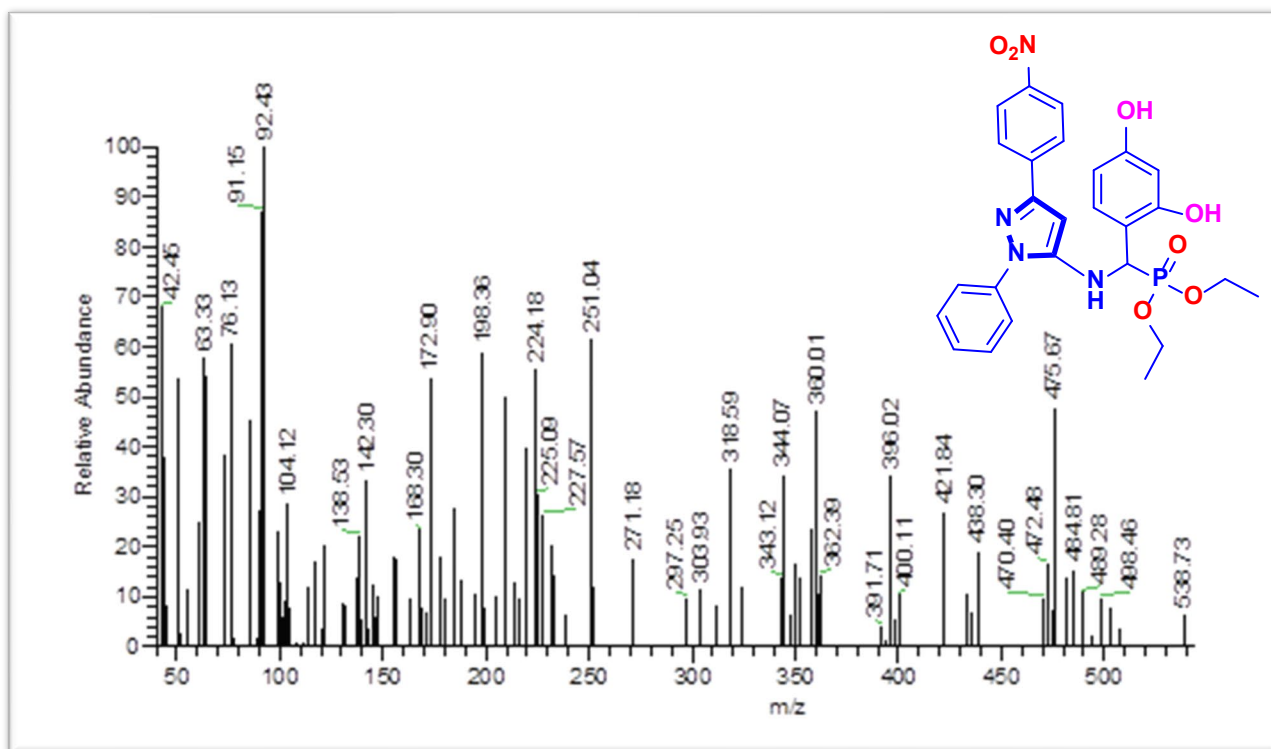

**Fig. S3.** Mass spectrum of  $\alpha$ -aminophosphonate **2a**

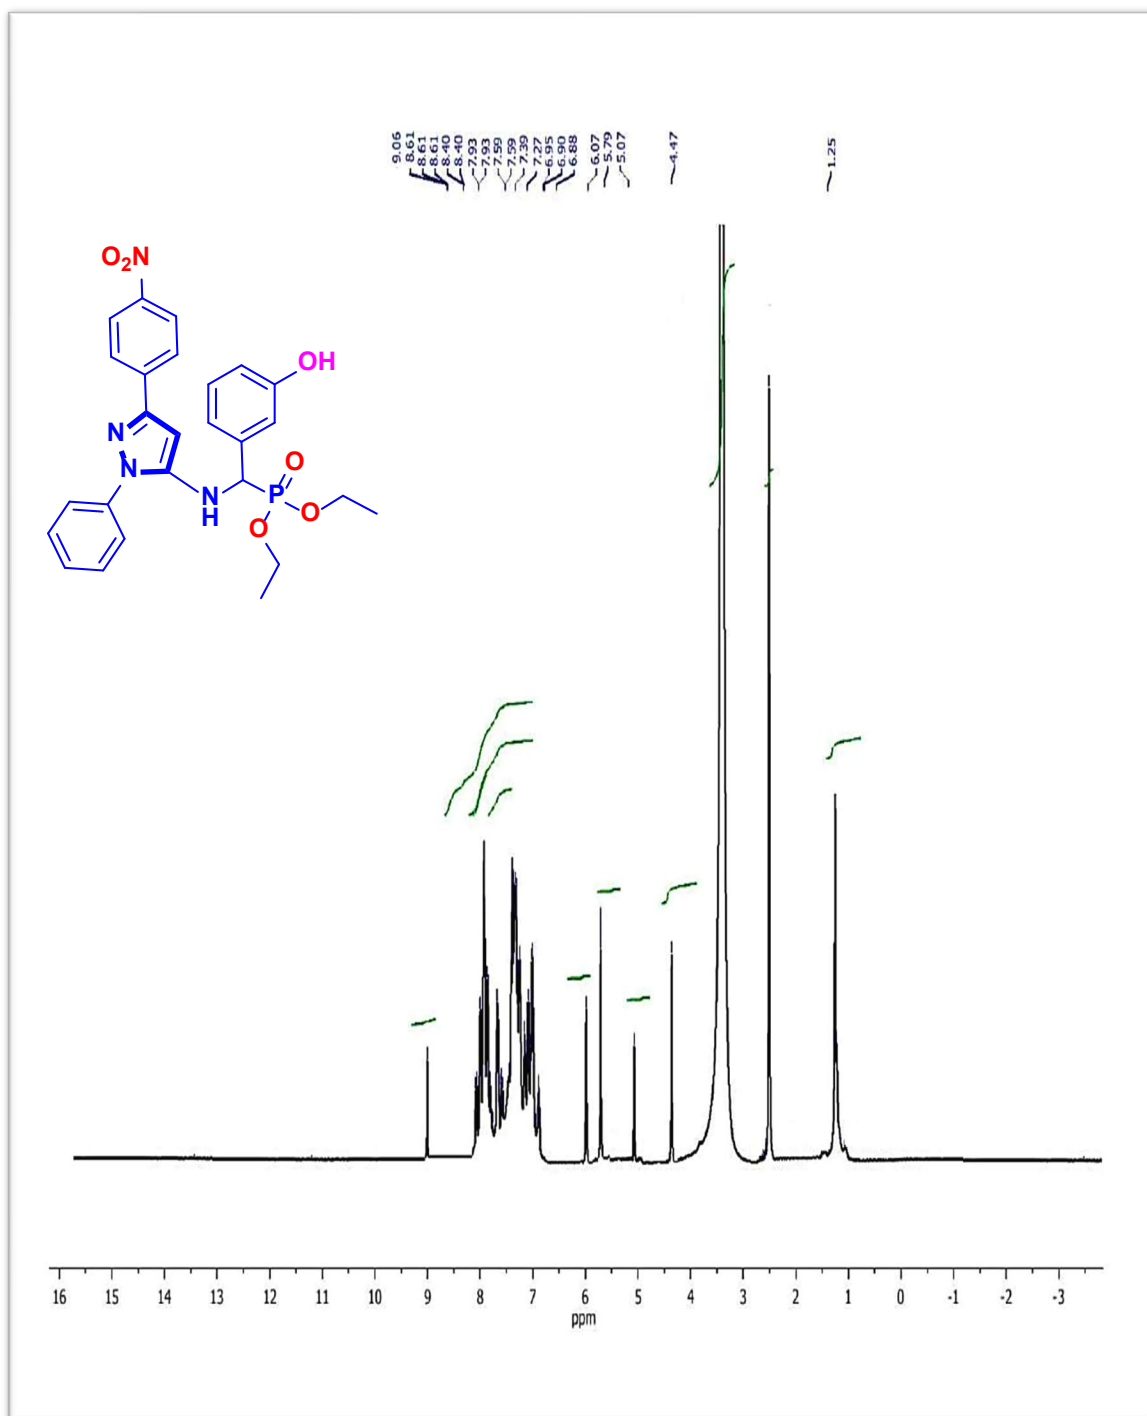

Fig. S4. <sup>1</sup>H-NMR spectrum of α-aminophosphonate **2b**.

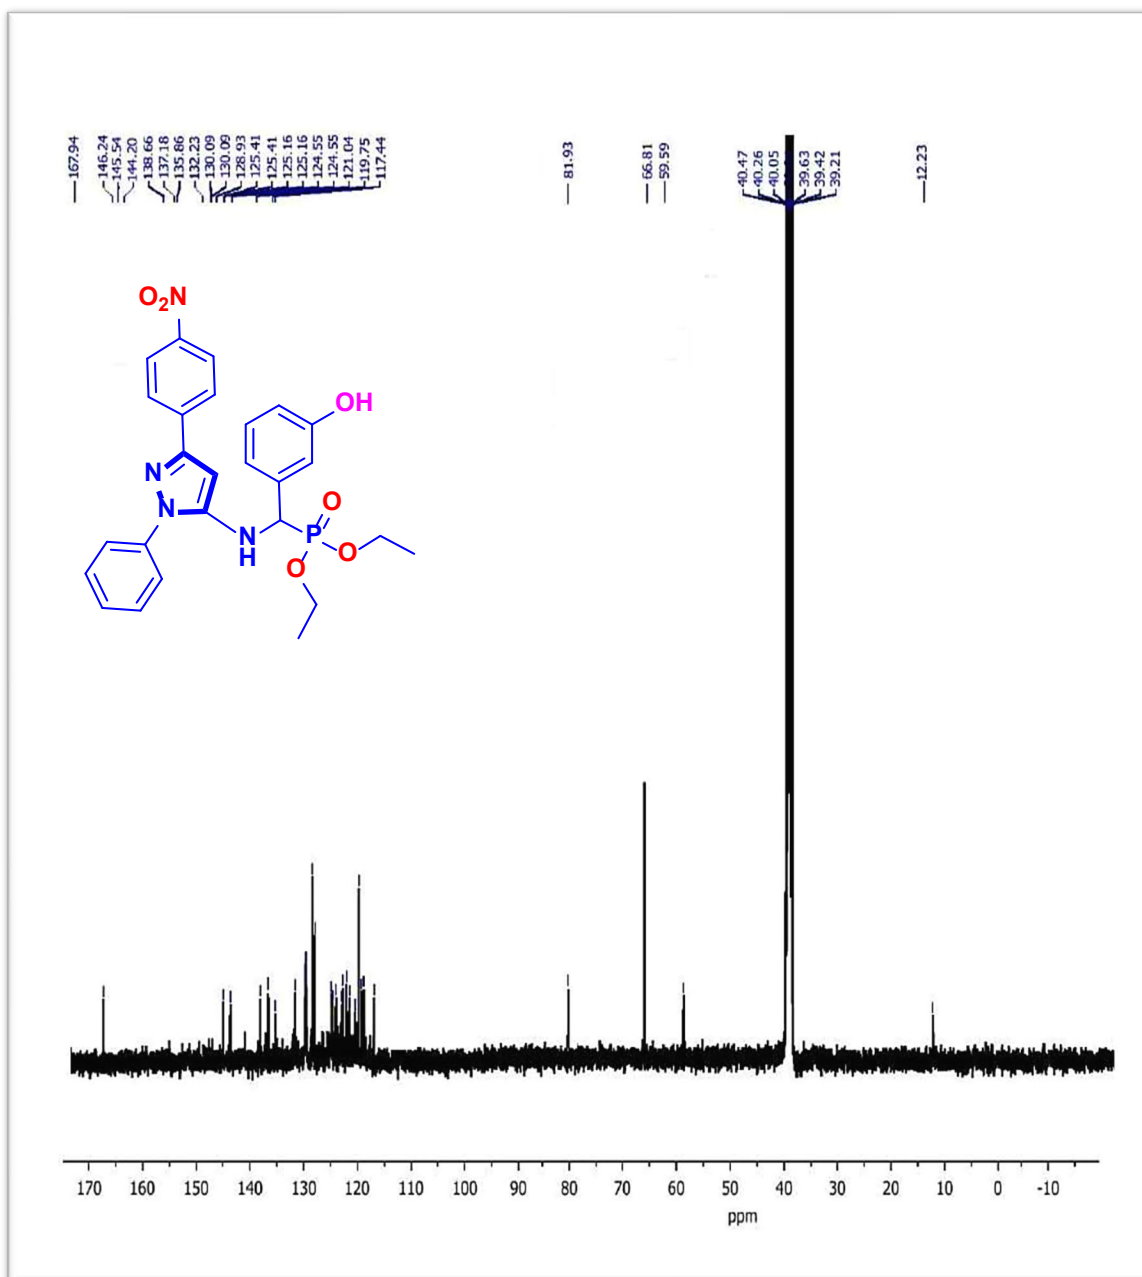

Fig. S5. <sup>13</sup>C-NMR spectrum of  $\alpha$ -aminophosphonate **2b**.

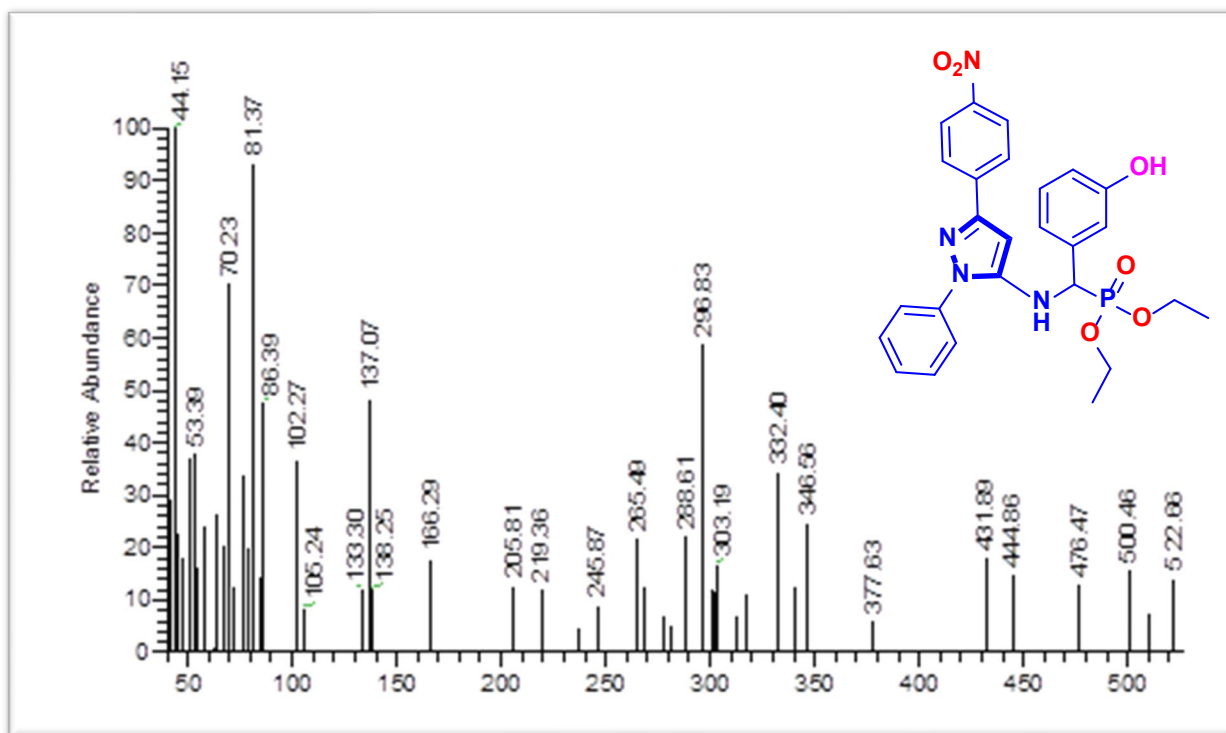

Fig. S6. Mass spectrum of  $\alpha$ -aminophosphonate **2b**.



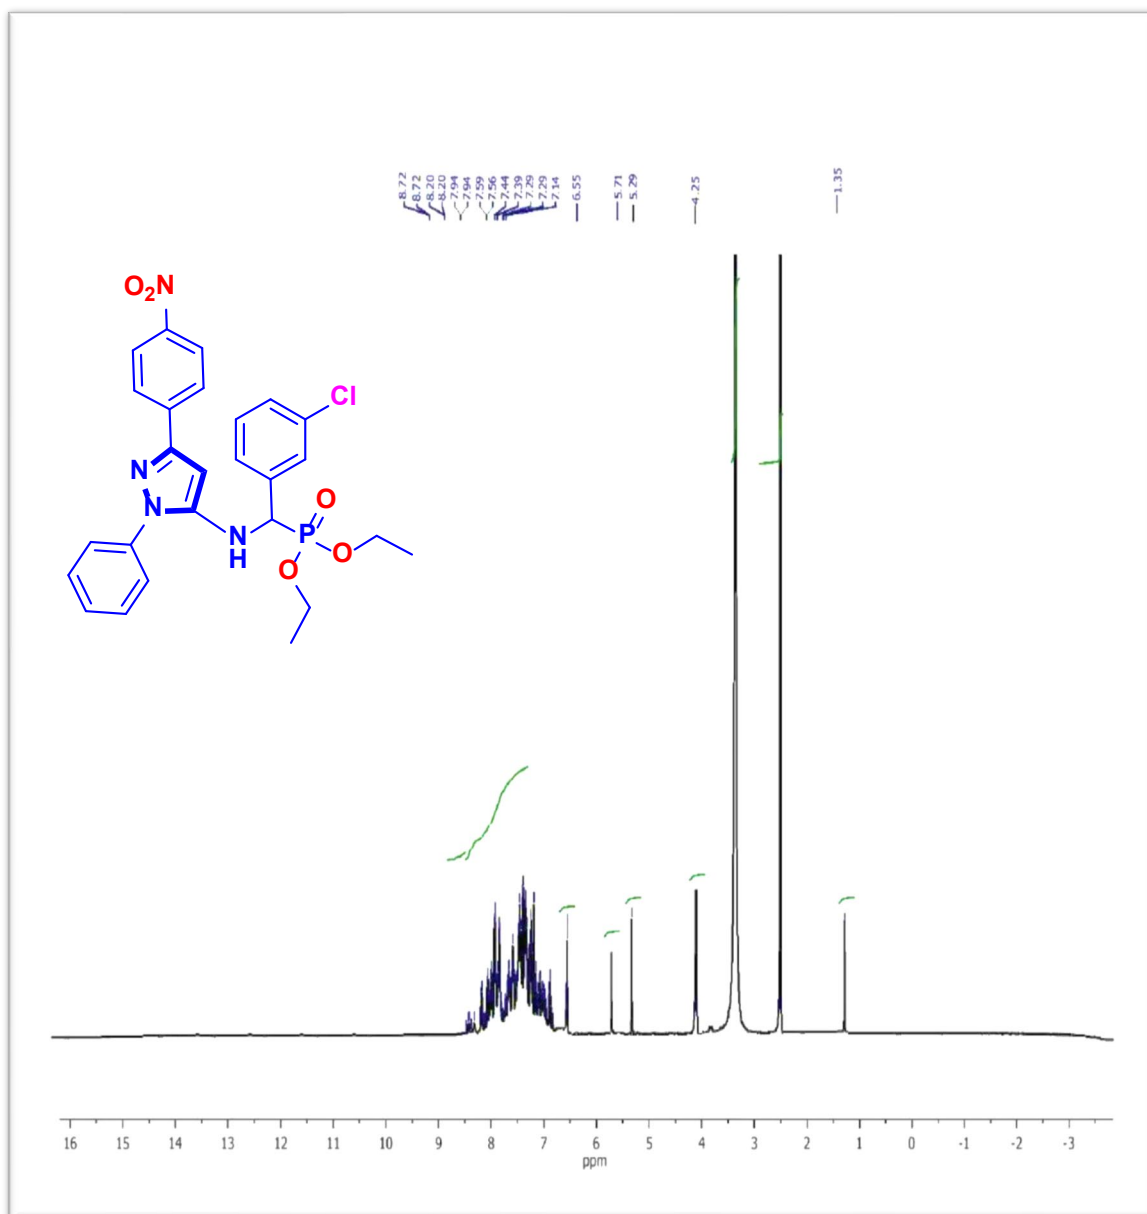

**Fig. S7.** <sup>1</sup>H-NMR spectrum of  $\alpha$ -aminophosphonate **2c**.

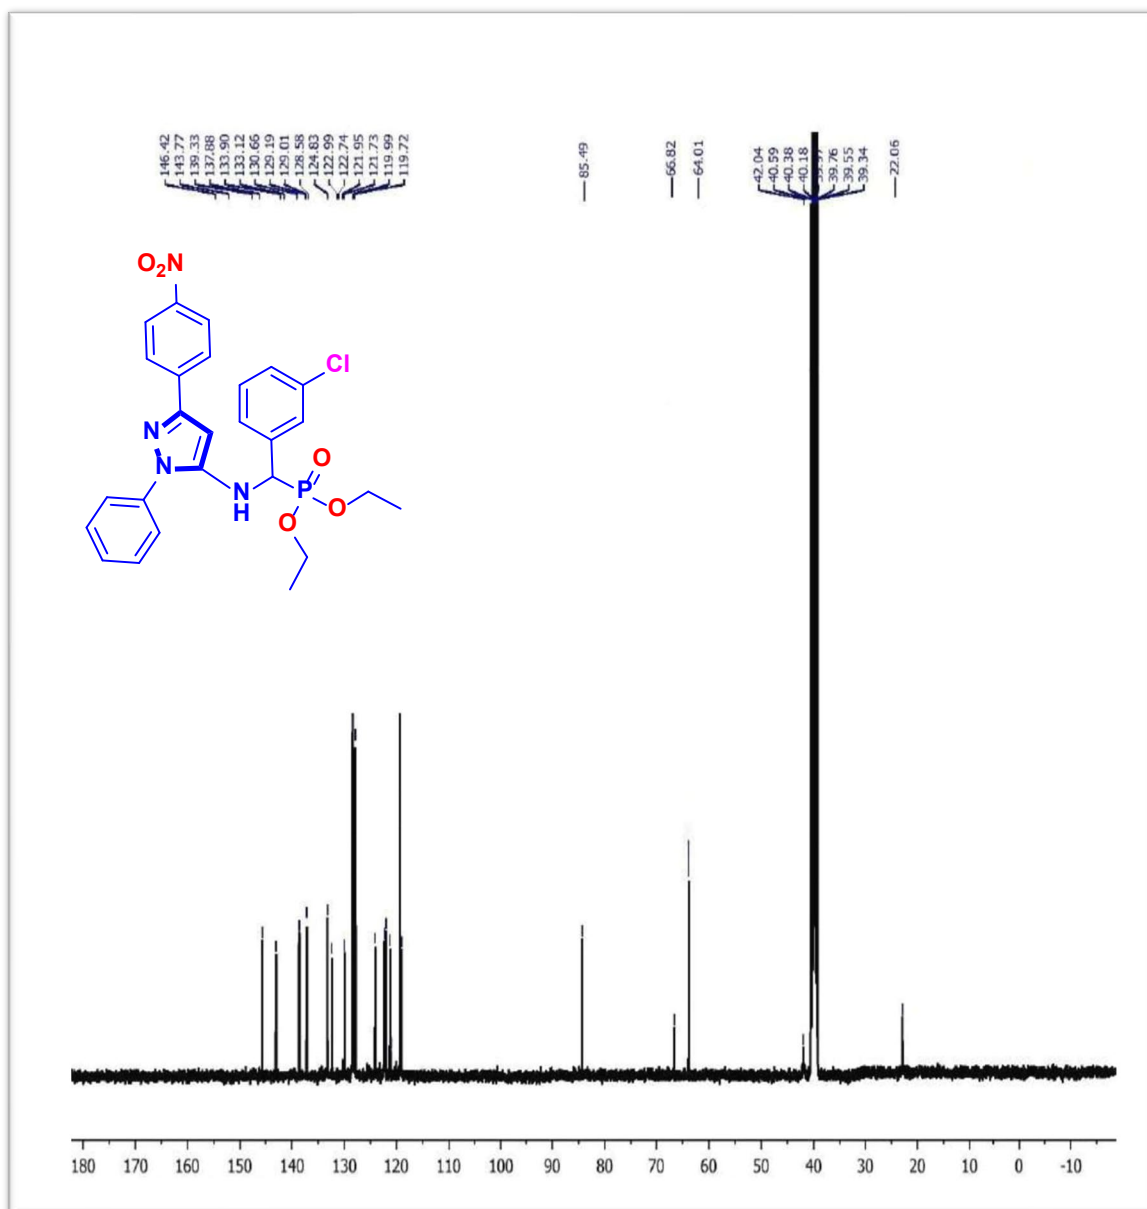

**Fig. S8.** <sup>13</sup>C-NMR spectrum of α-aminophosphonate **2c**.

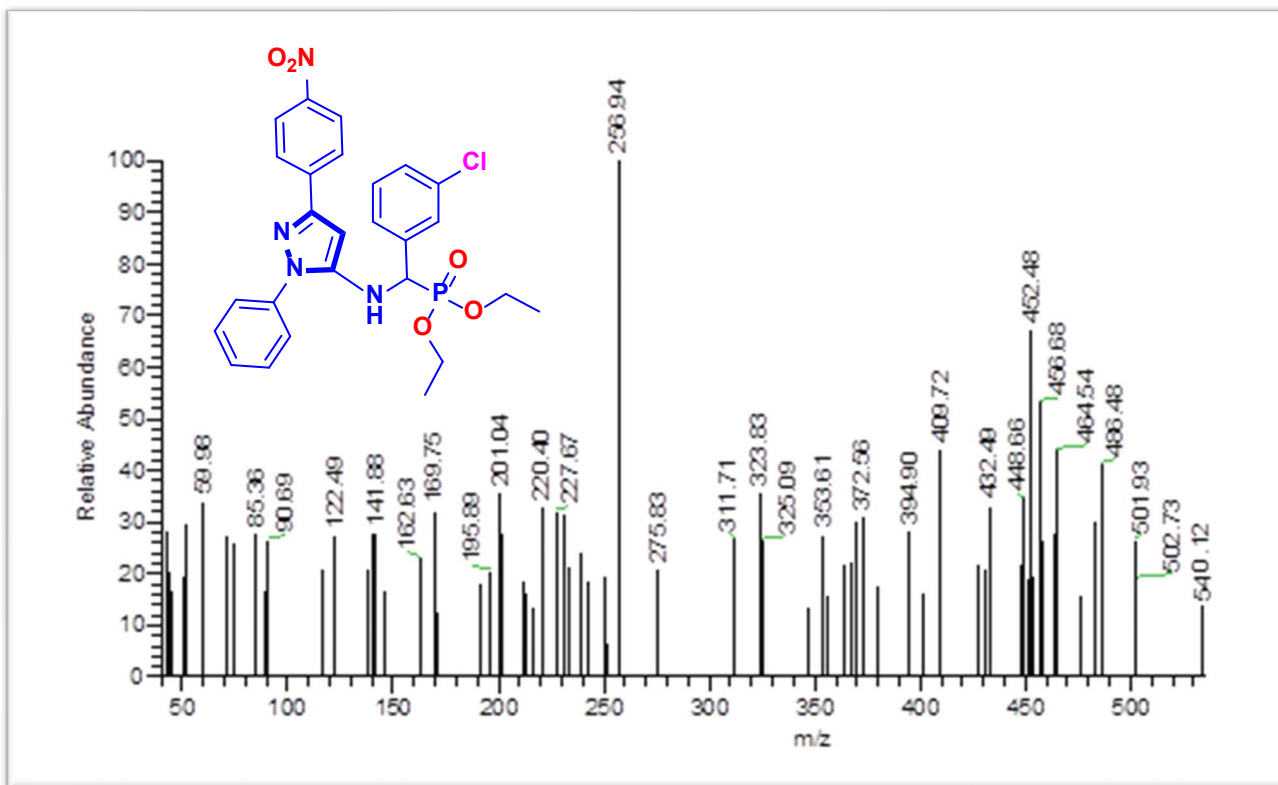

Fig. S9. Mass spectrum of  $\alpha$ -aminophosphonate **2c**

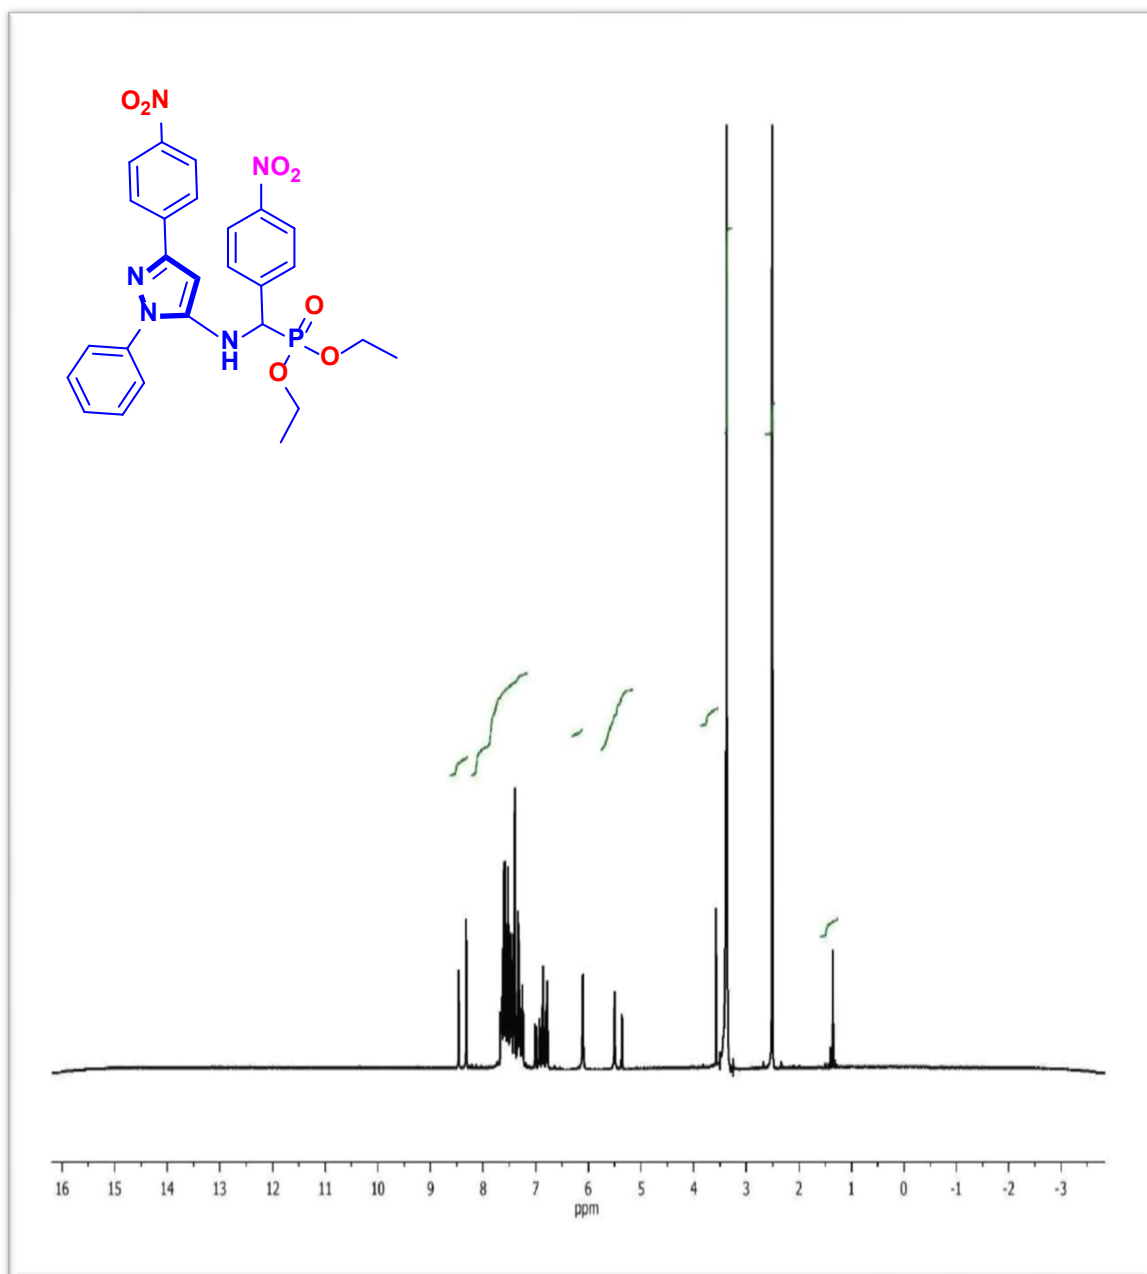

**Fig. S10.**  $^1\text{H-NMR}$  spectrum of  $\alpha$ -aminophosphonate **2d**.

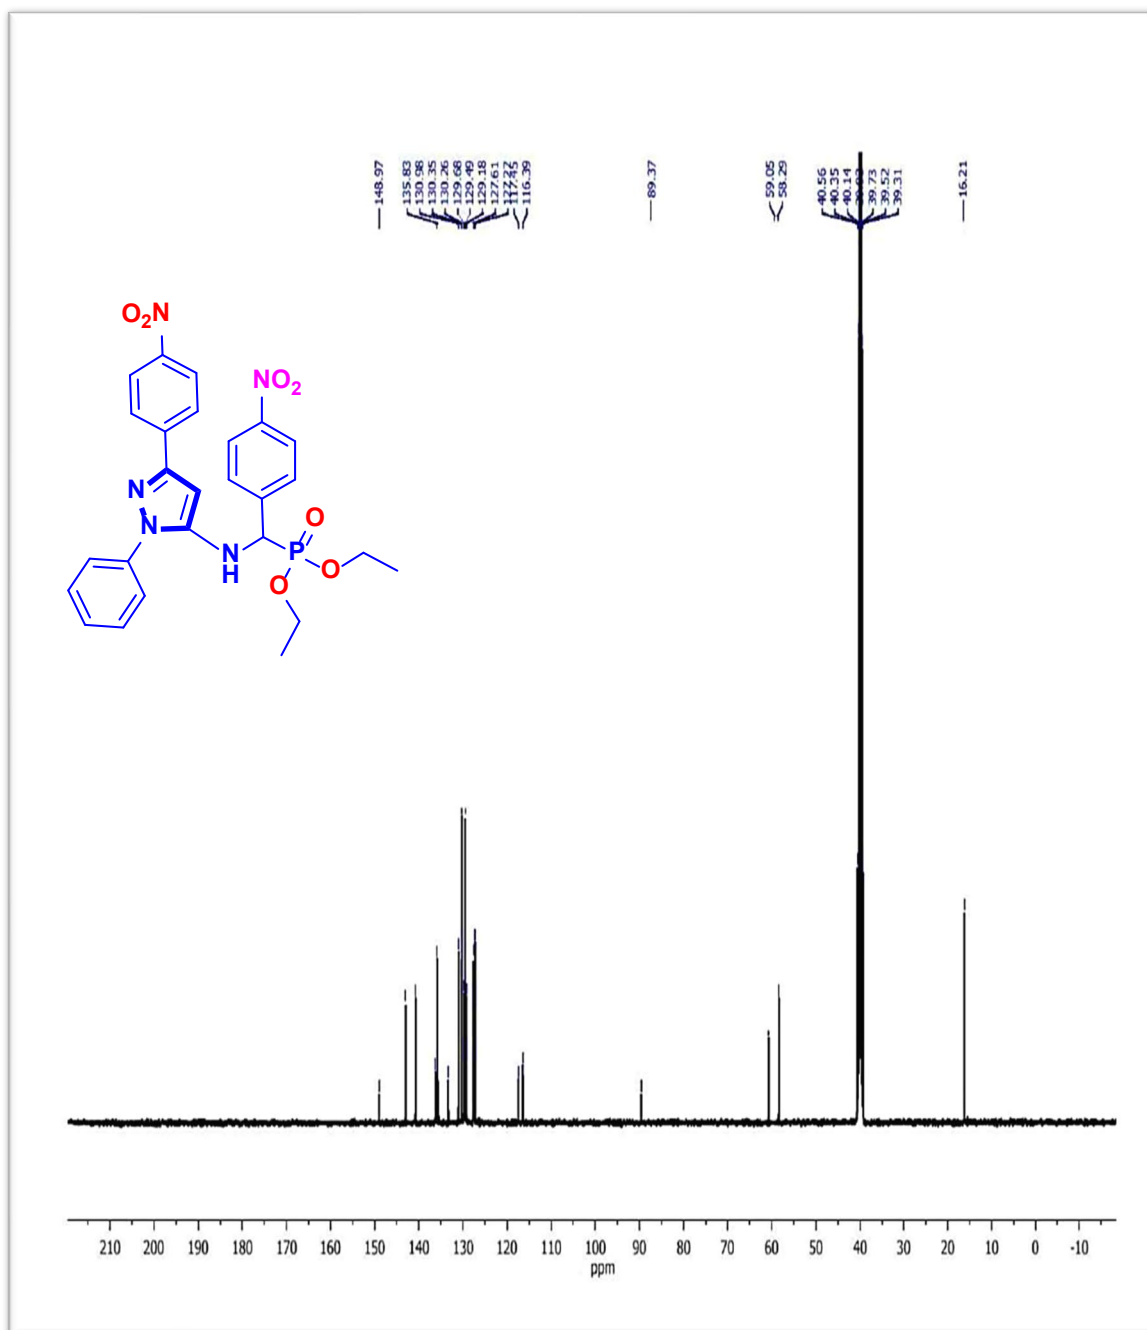

Fig. S11.  $^{13}\text{C}$ -NMR spectrum of  $\alpha$ -aminophosphonate **2d**.

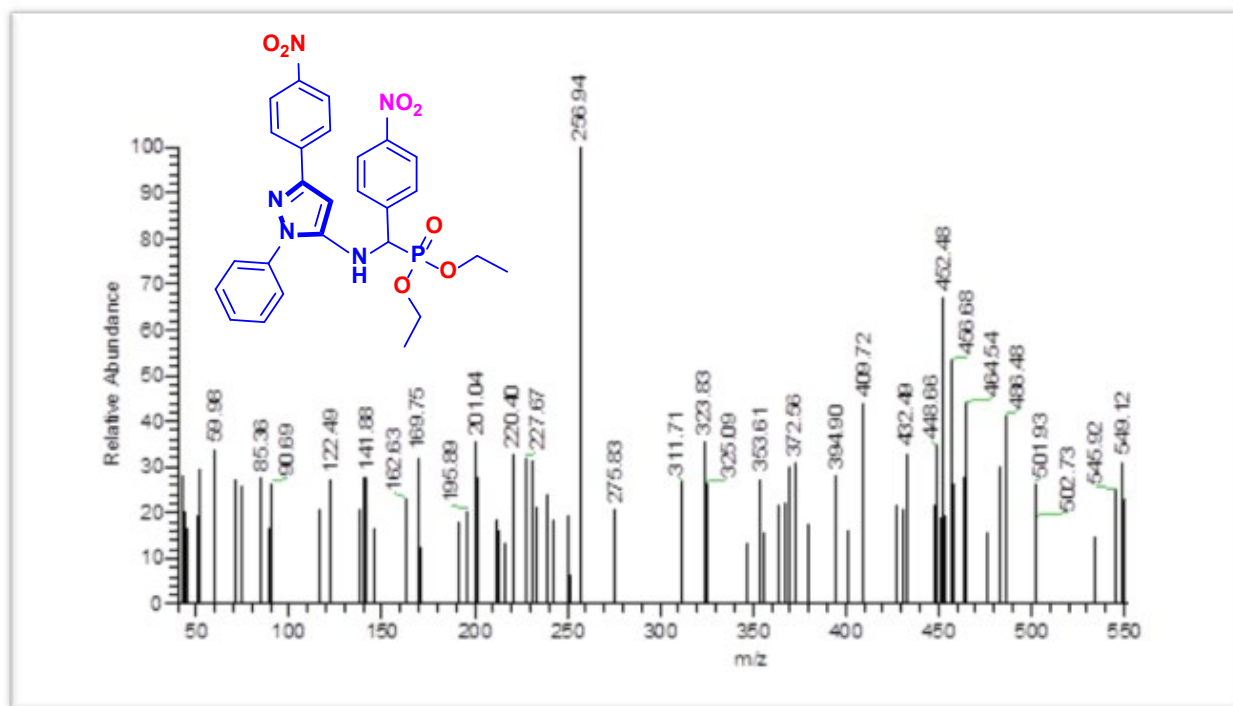

Fig. S12. Mass spectrum of  $\alpha$ -aminophosphonate **2d**

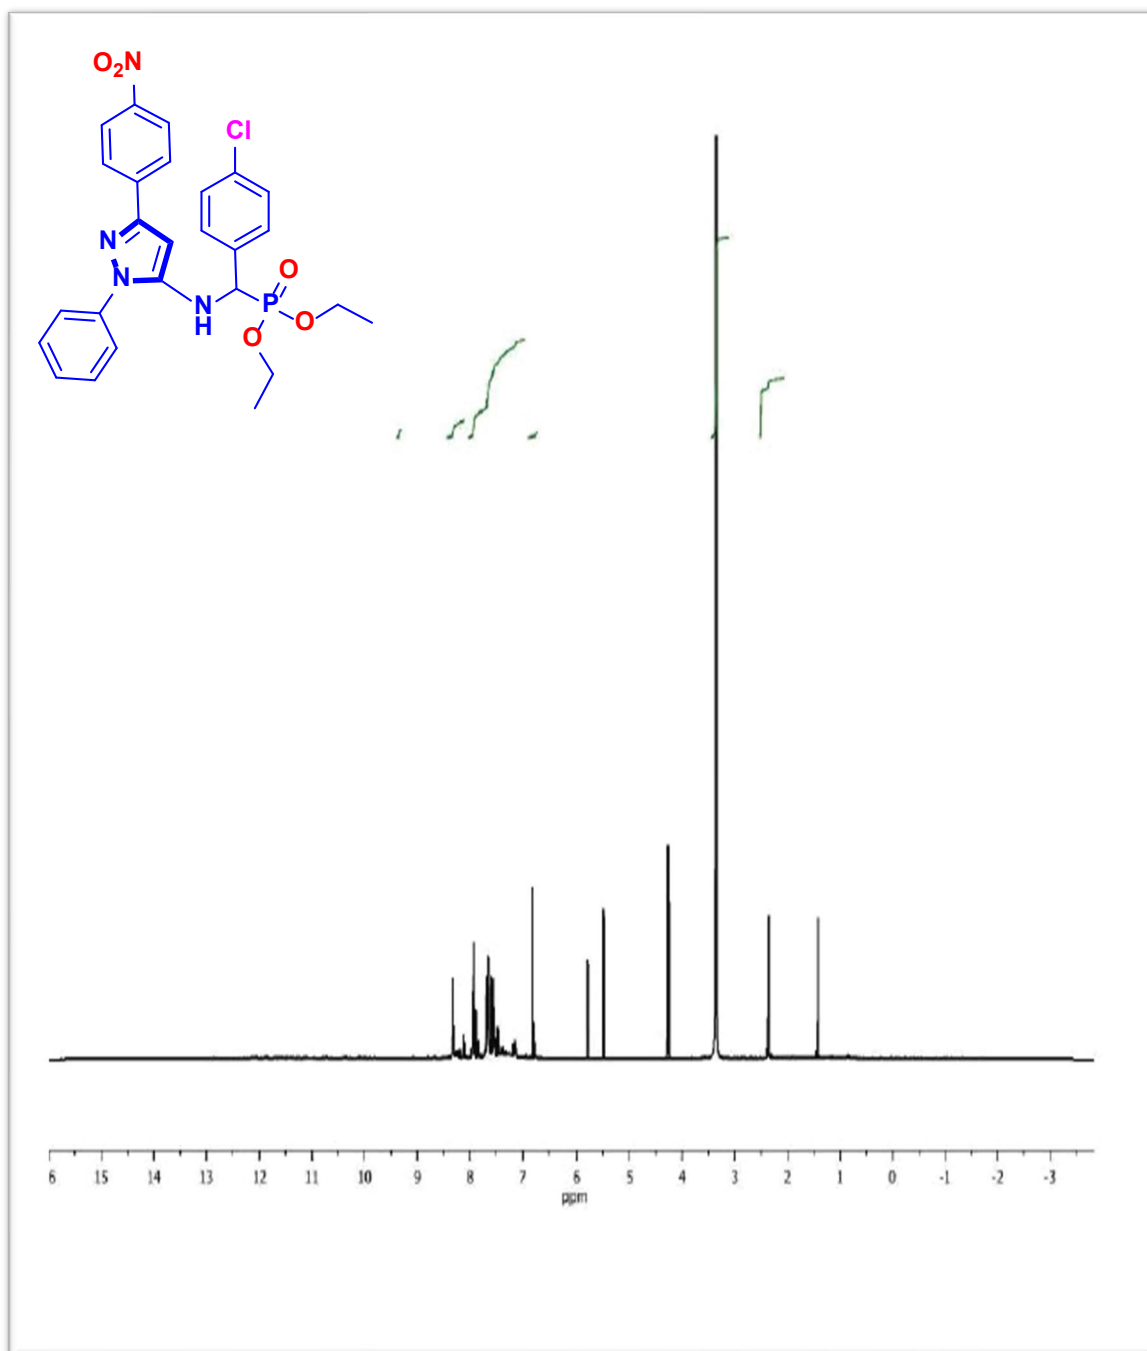

**Fig. S13.**  $^1\text{H-NMR}$  spectrum of  $\alpha$ -aminophosphonate **2e**.

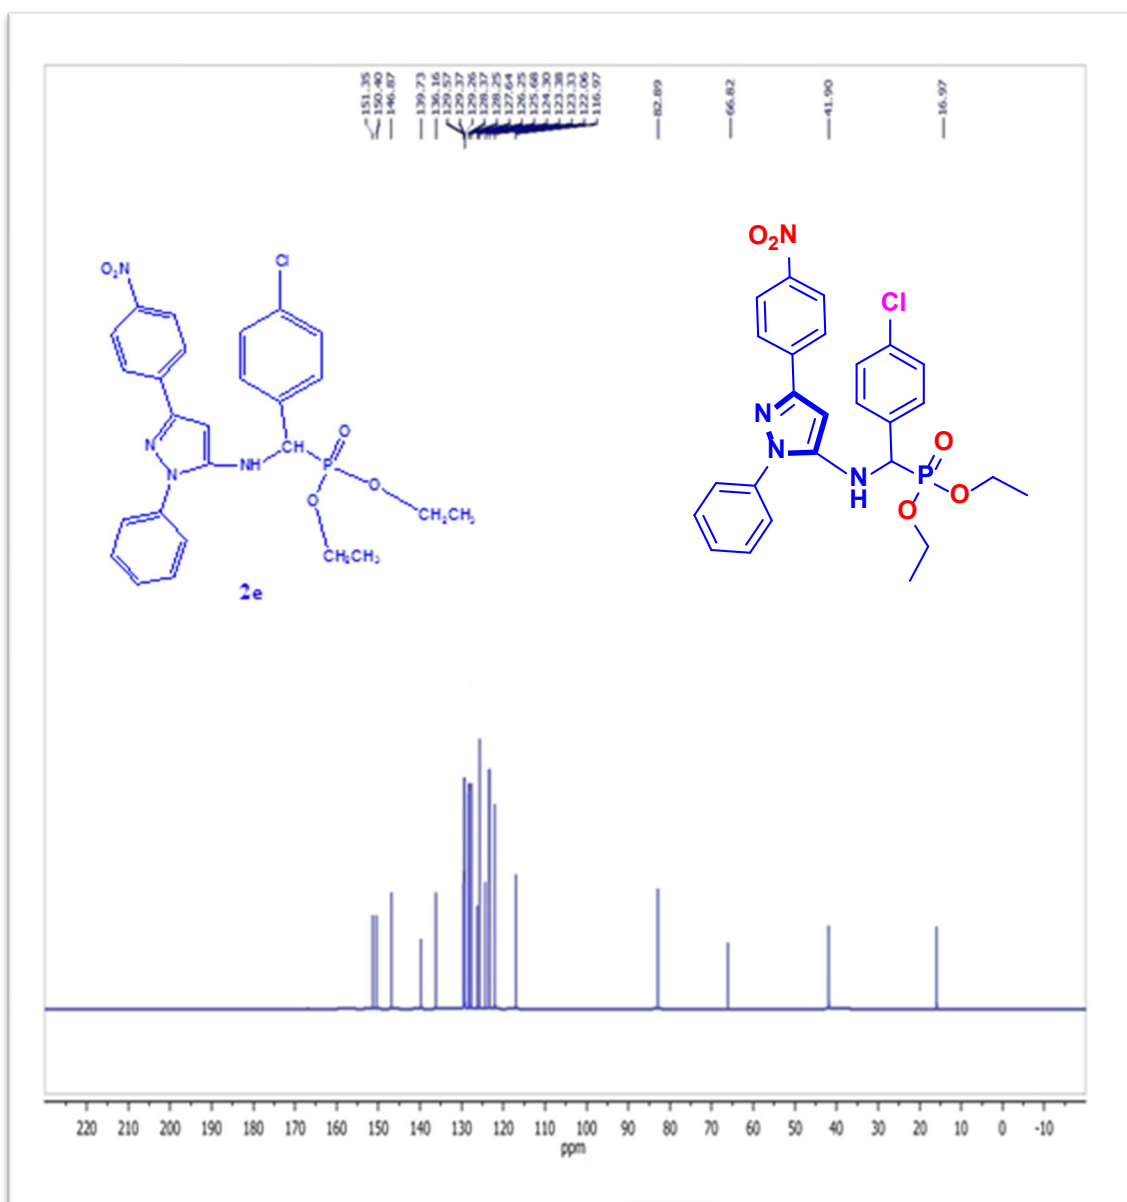

Fig. S14.  $^{13}\text{C}$ -NMR spectrum of  $\alpha$ -aminophosphonate **2e**.



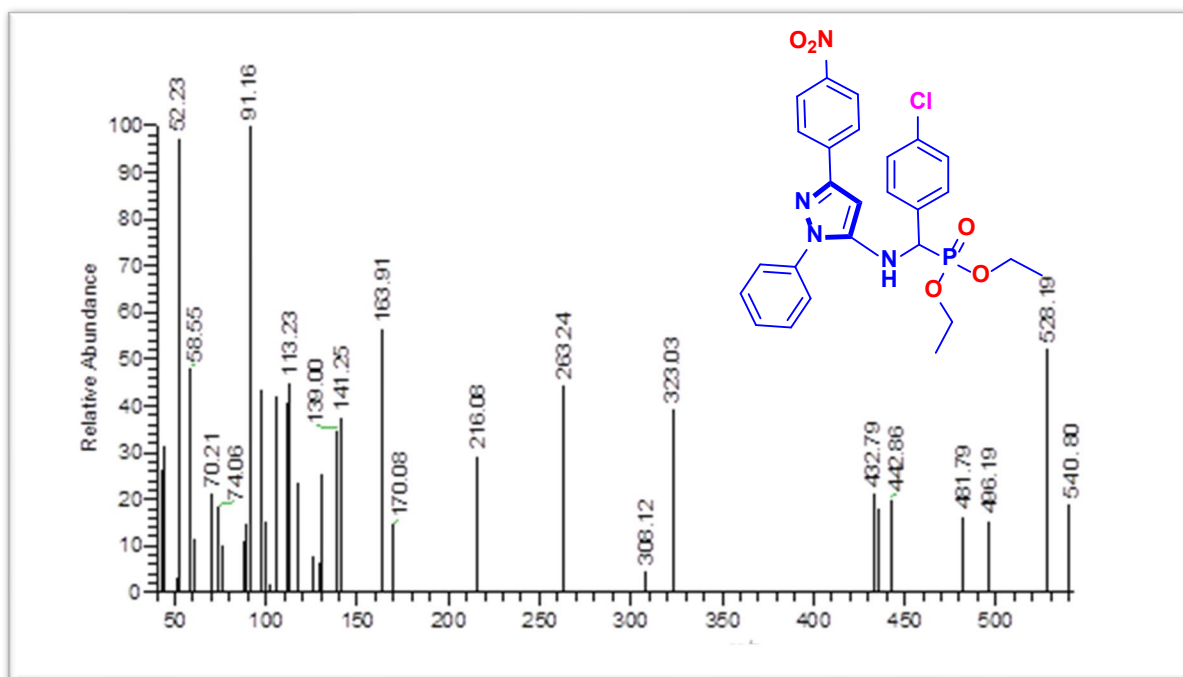

Fig. S15. Mass spectrum of  $\alpha$ -aminophosphonate **2e**

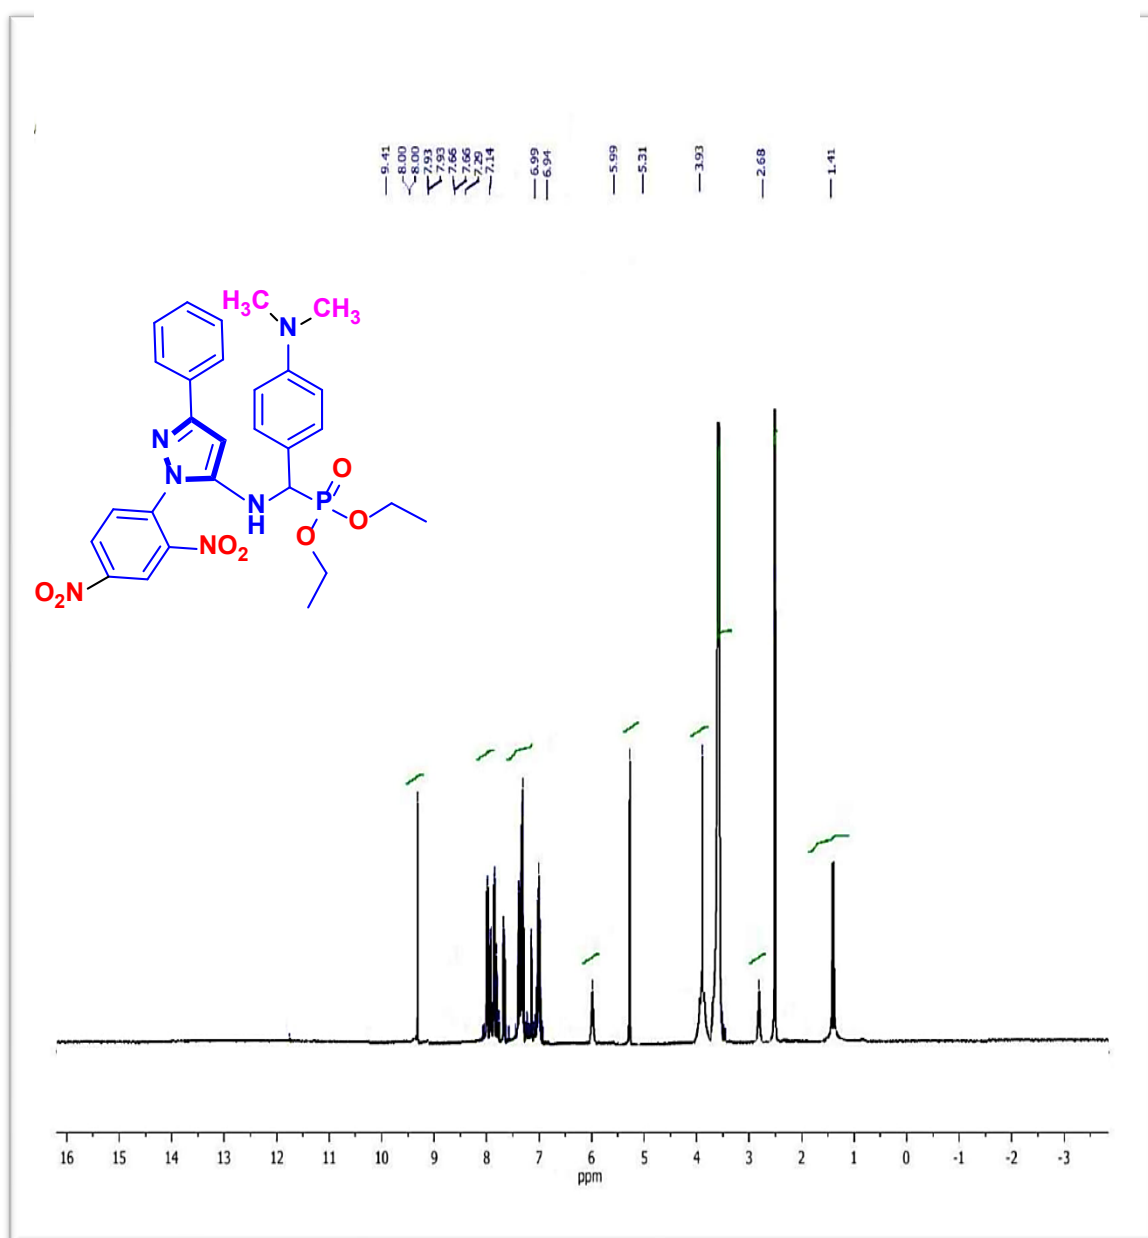

Fig. S16. <sup>1</sup>H-NMR spectrum of α-aminophosphonate 2f.

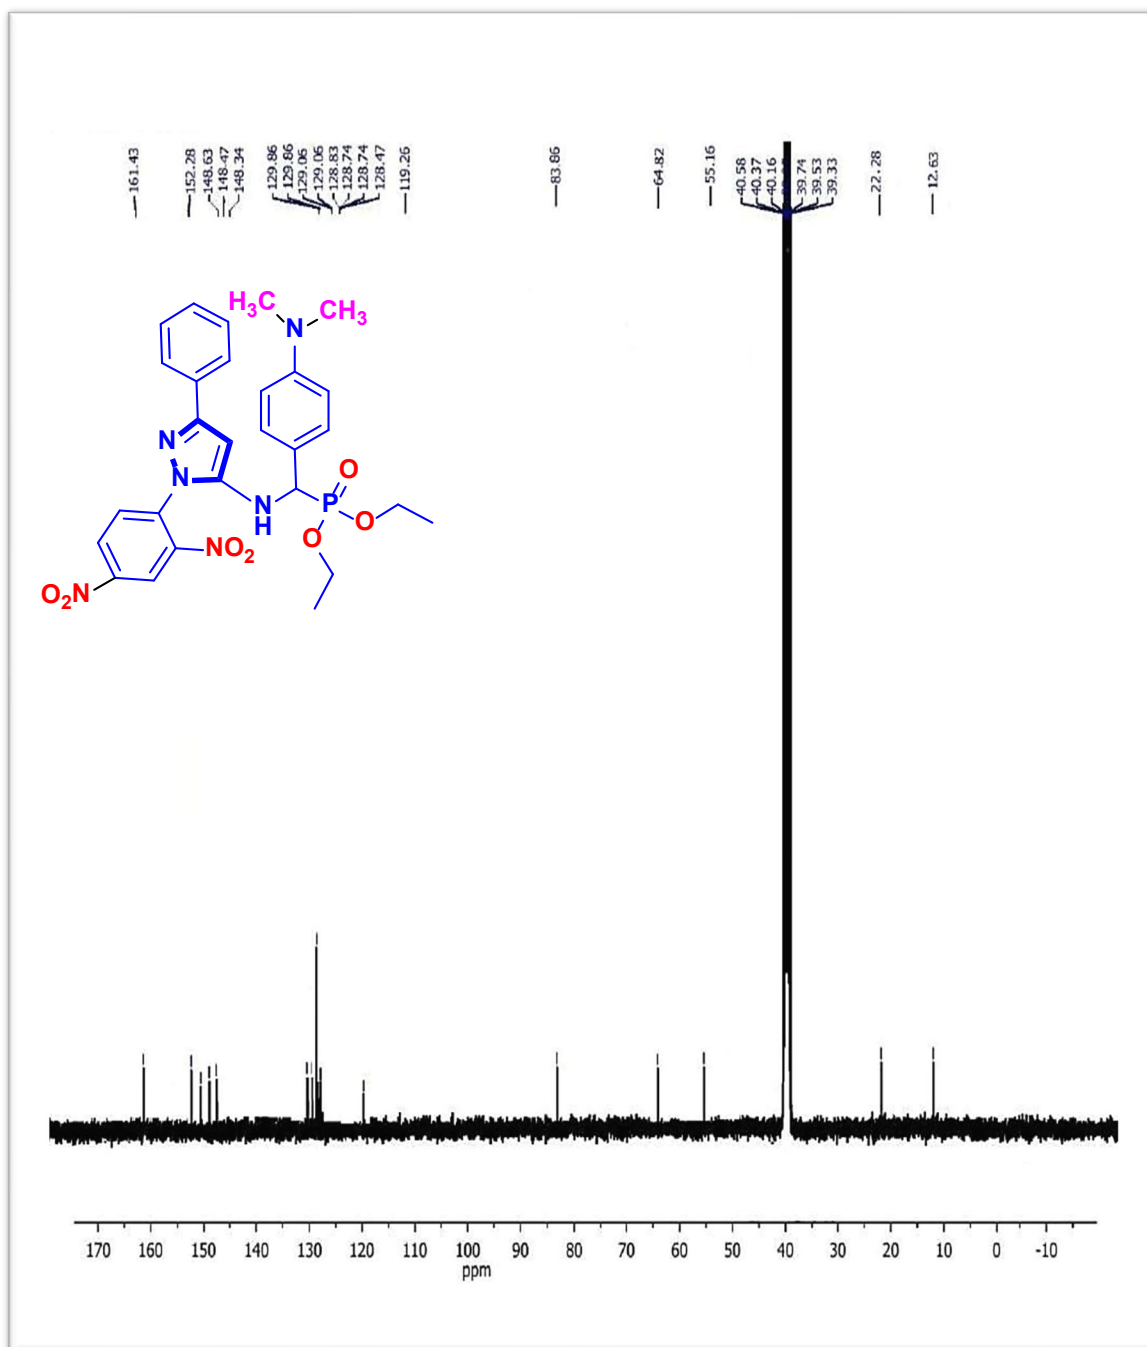

Fig. S17.  $^{13}\text{C}$ -NMR spectrum of  $\alpha$ -aminophosphonate **2f**.

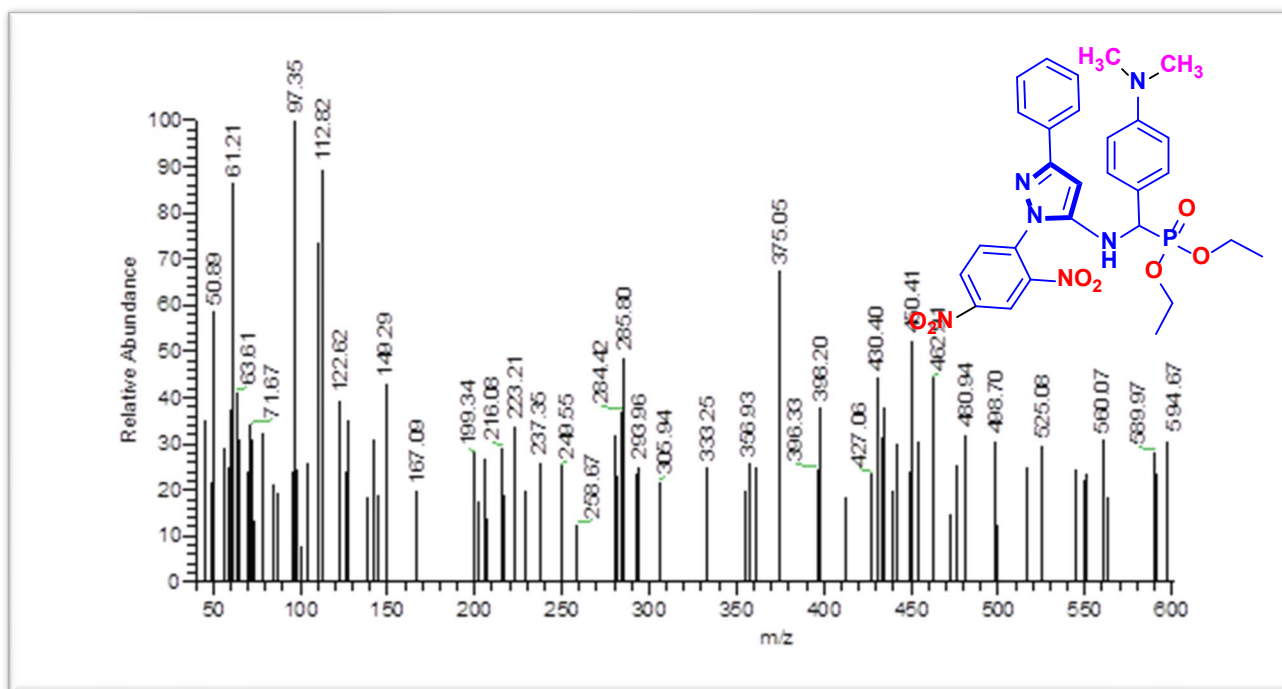

Fig. S18. Mass spectrum of  $\alpha$ -aminophosphonate **2f**

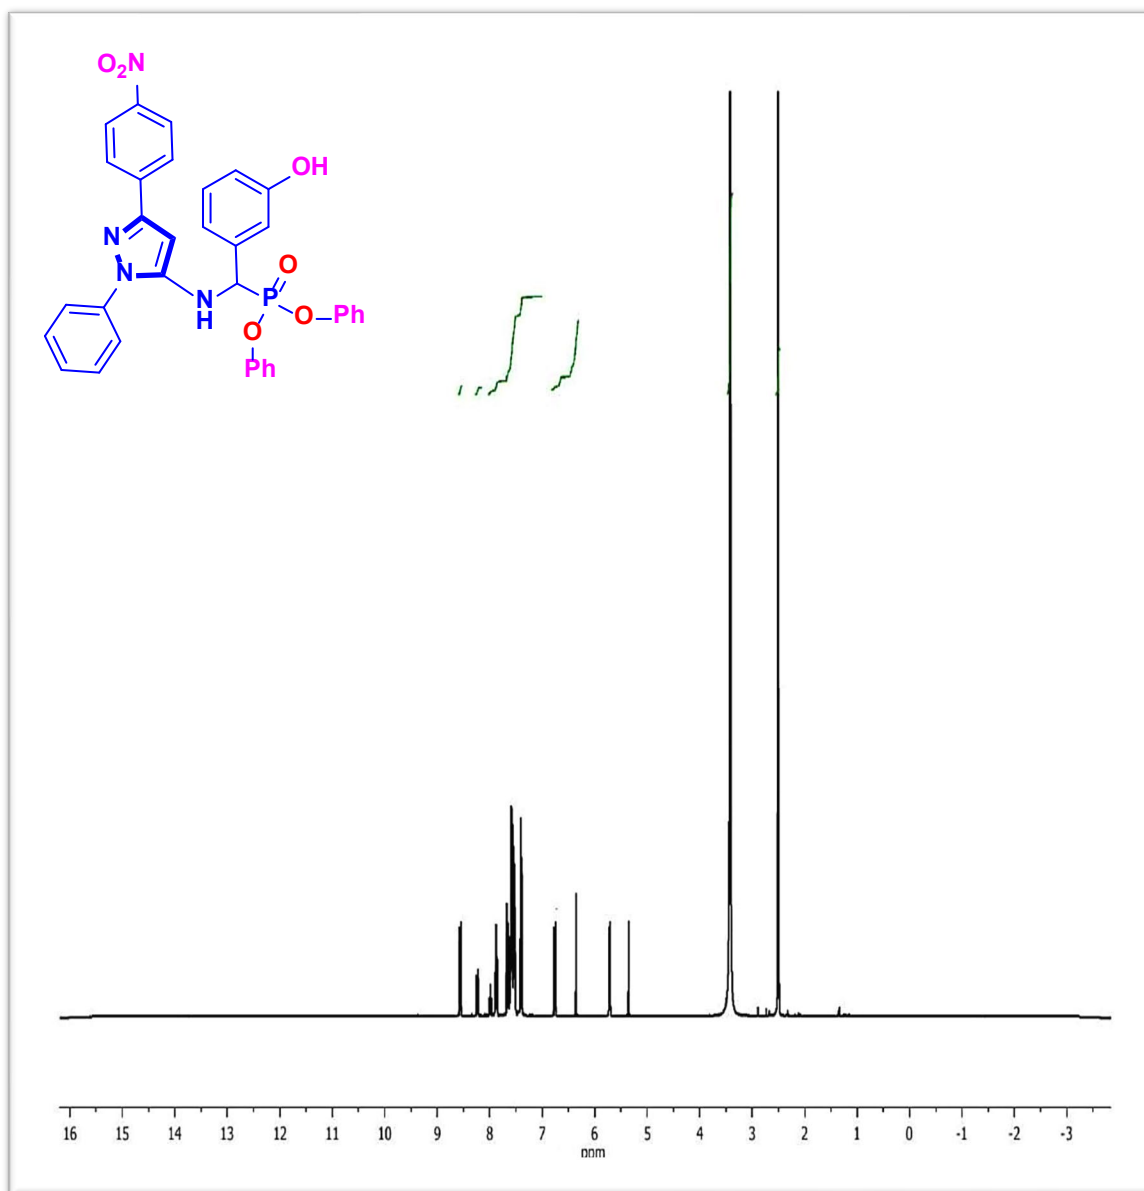

**Fig. S19.**  $^1\text{H-NMR}$  spectrum of  $\alpha$ -aminophosphonate **4a**.

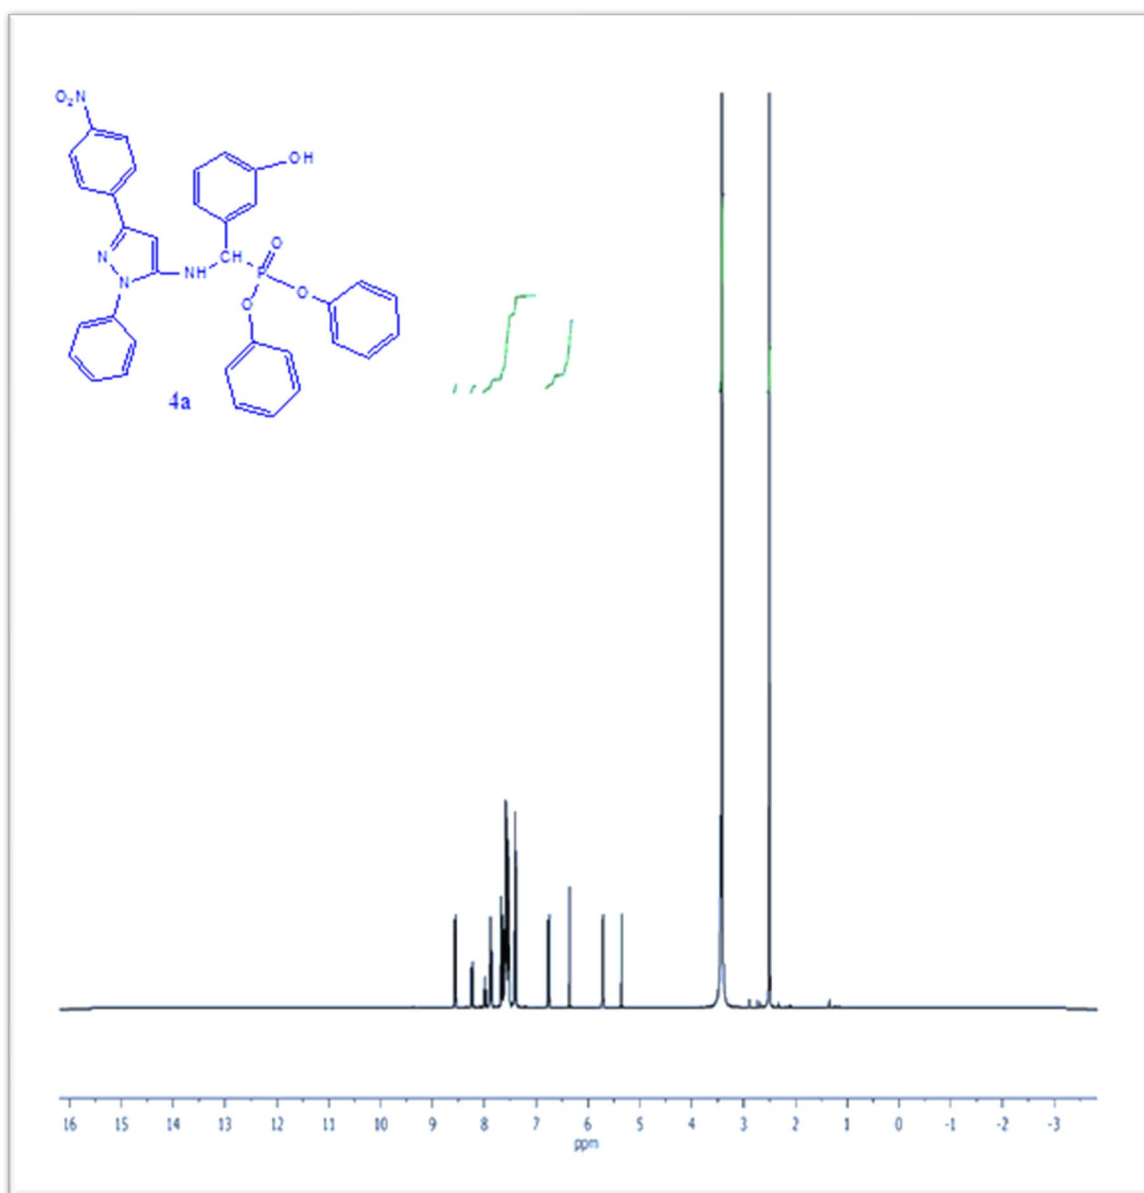

**Fig. S20**  $^{13}\text{C}$ -NMR spectrum of  $\alpha$ -aminophosphonate **4a**.

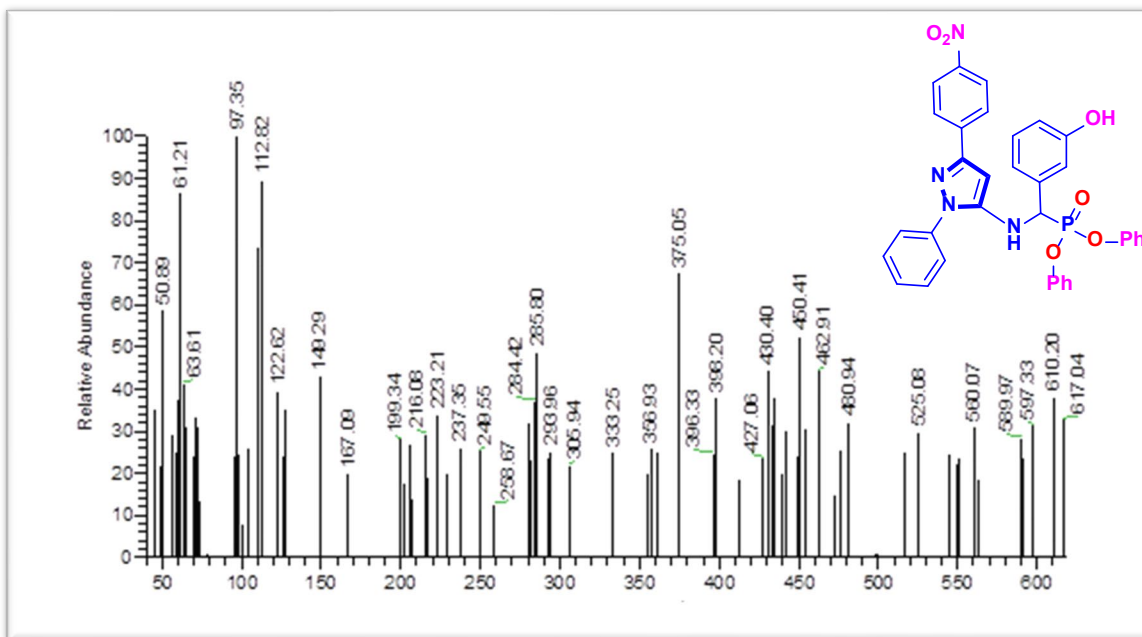

Fig. S21. Mass spectrum of  $\alpha$ -aminophosphonate 4a

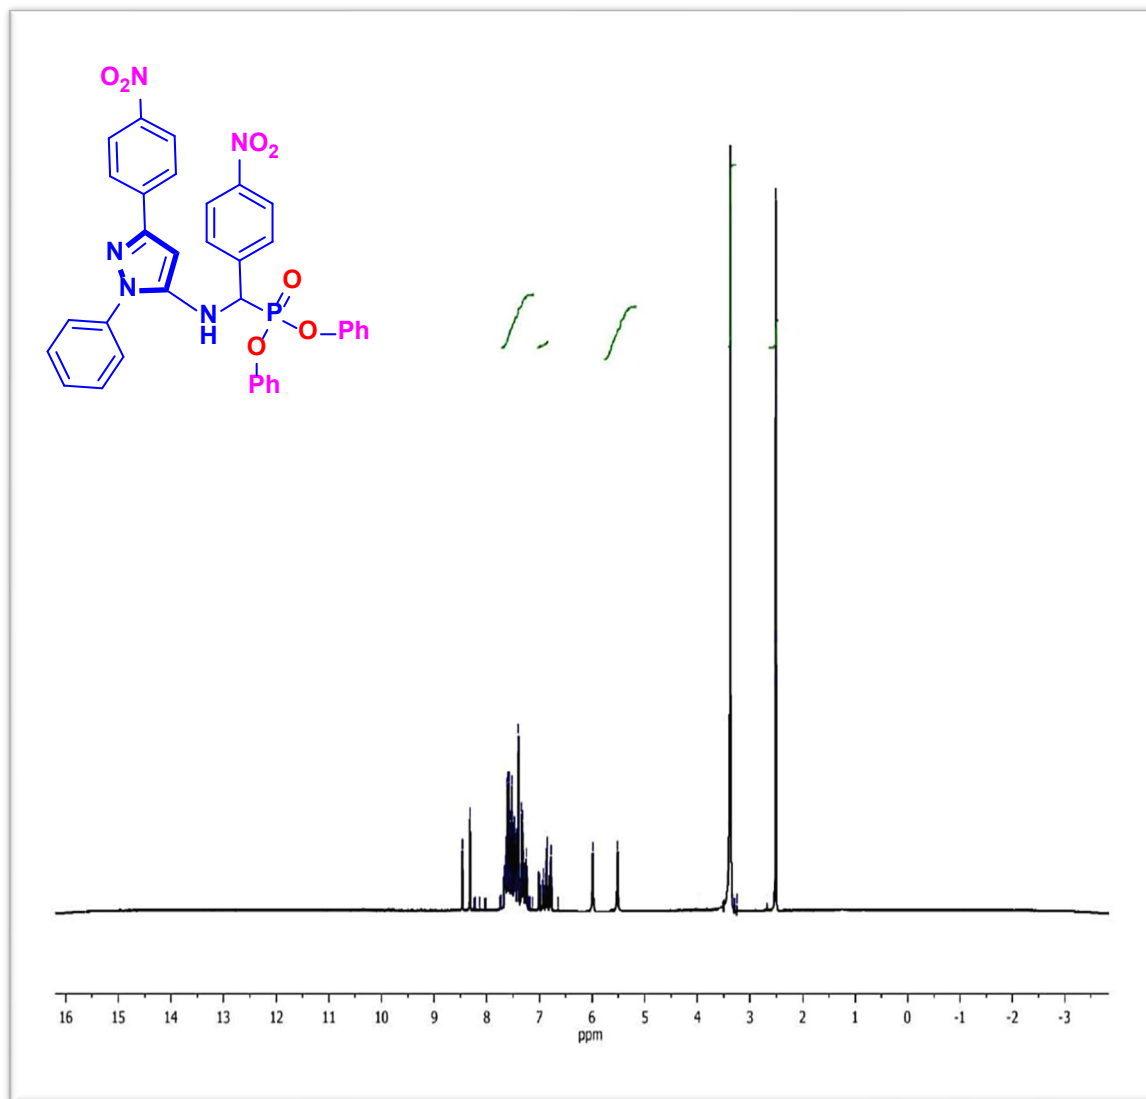

**Fig. S22.**  $^1\text{H-NMR}$  spectrum of  $\alpha$ -aminophosphonate **4b**.



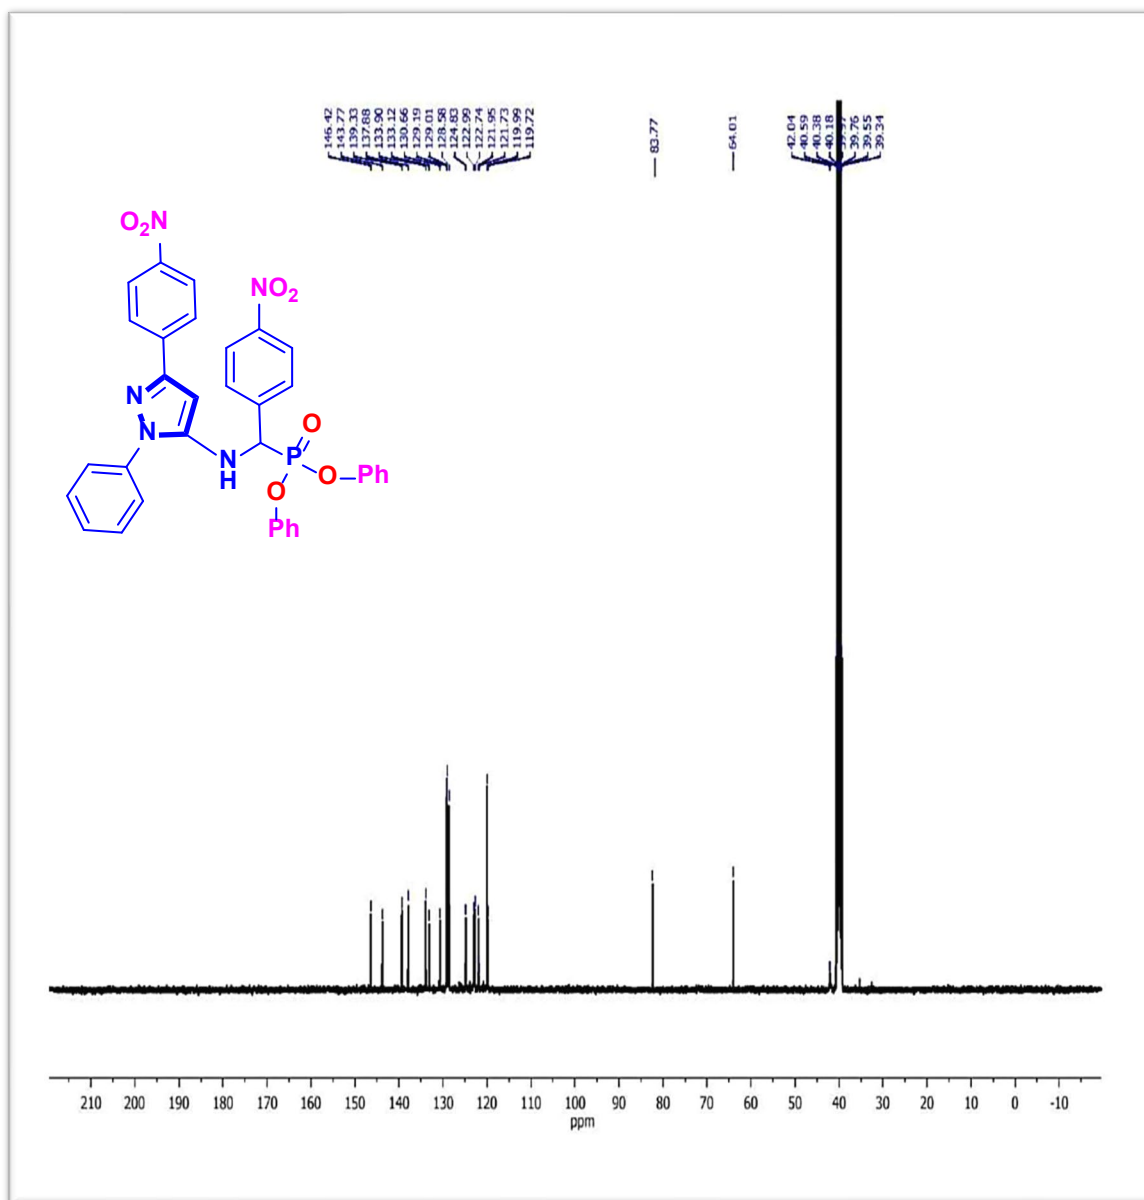

Fig. S23. <sup>13</sup>C-NMR spectrum of  $\alpha$ -aminophosphonate **4b**.

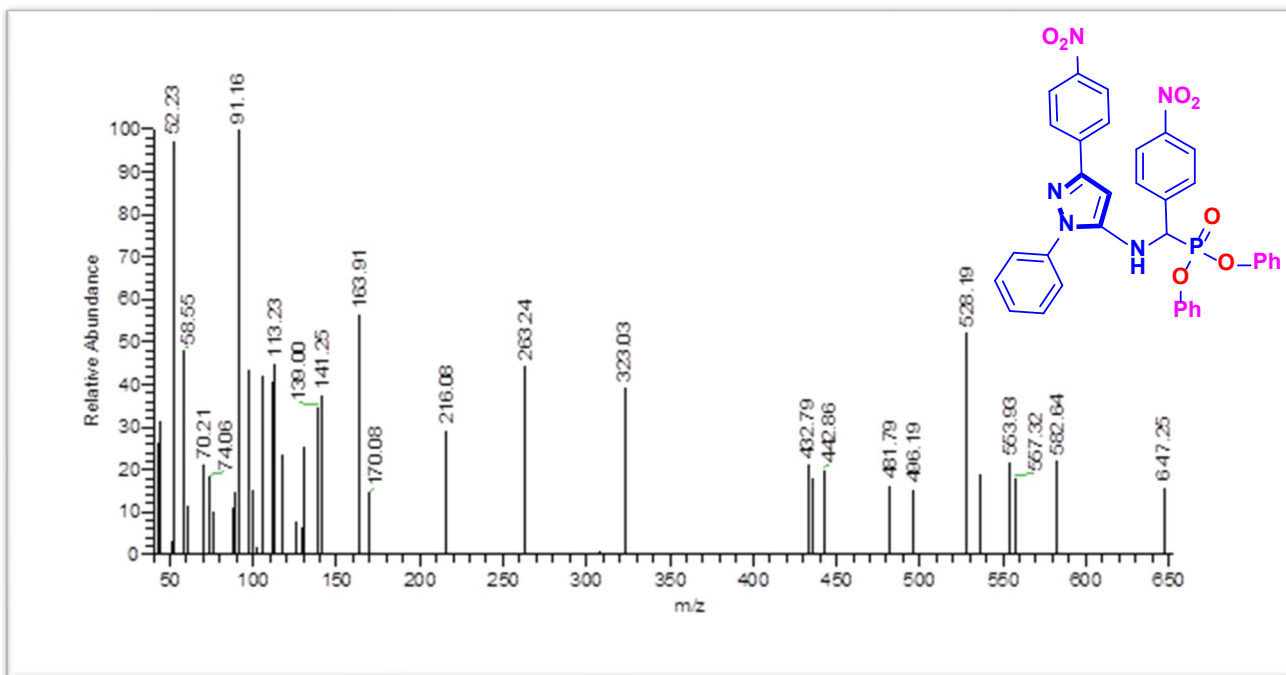

**Fig. S24.** Mass spectrum of  $\alpha$ -aminophosphonate **4b**

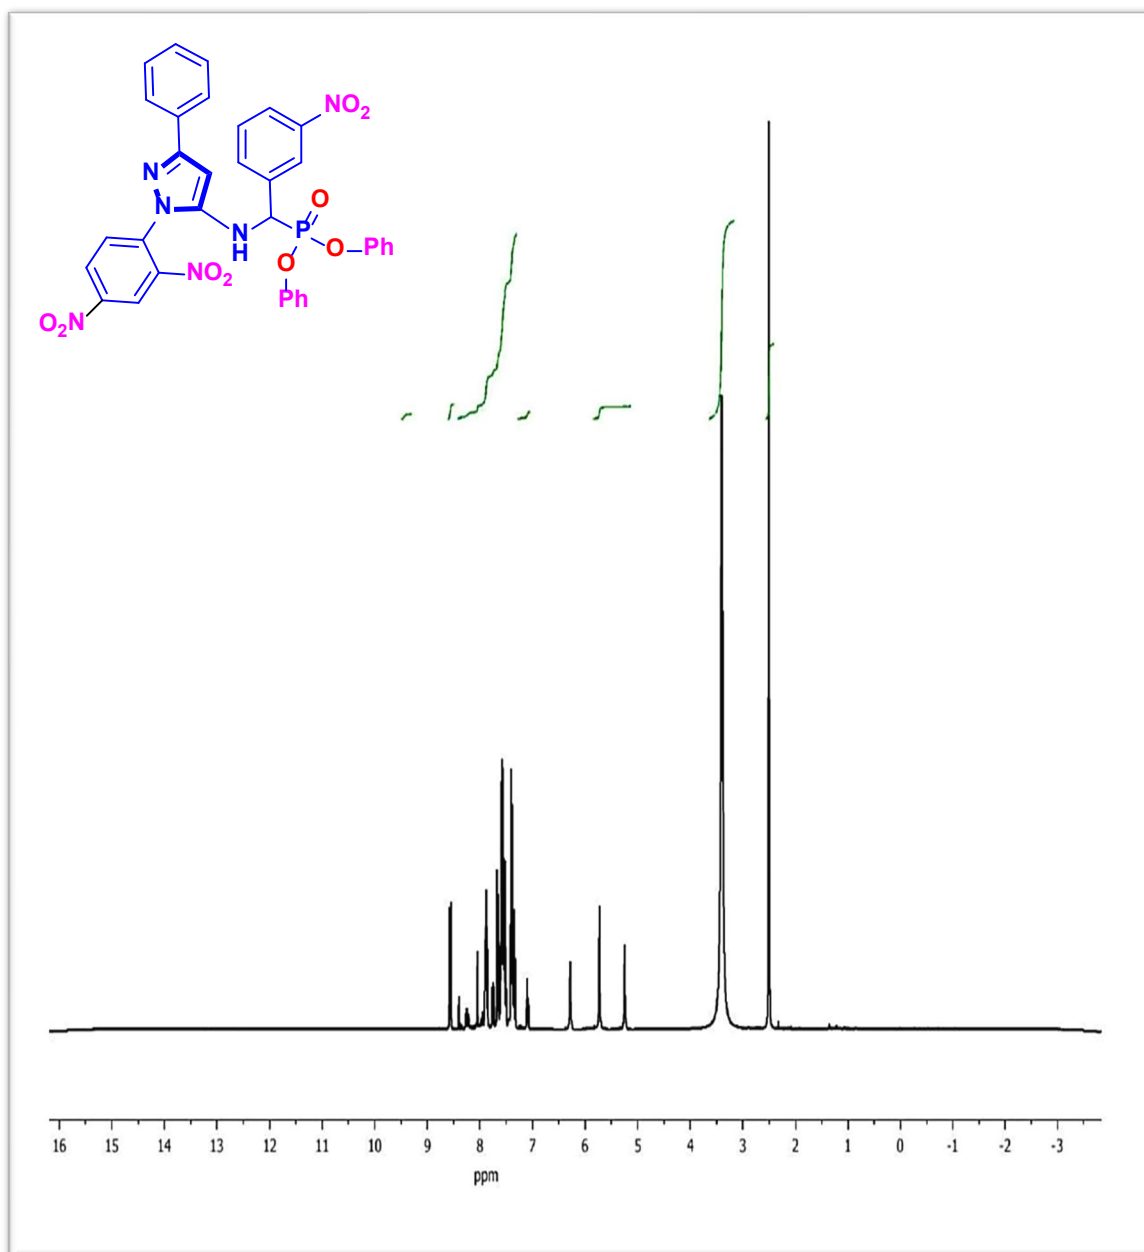

**Fig. S25.** <sup>1</sup>H-NMR spectrum of α-aminophosphonate **4c**.

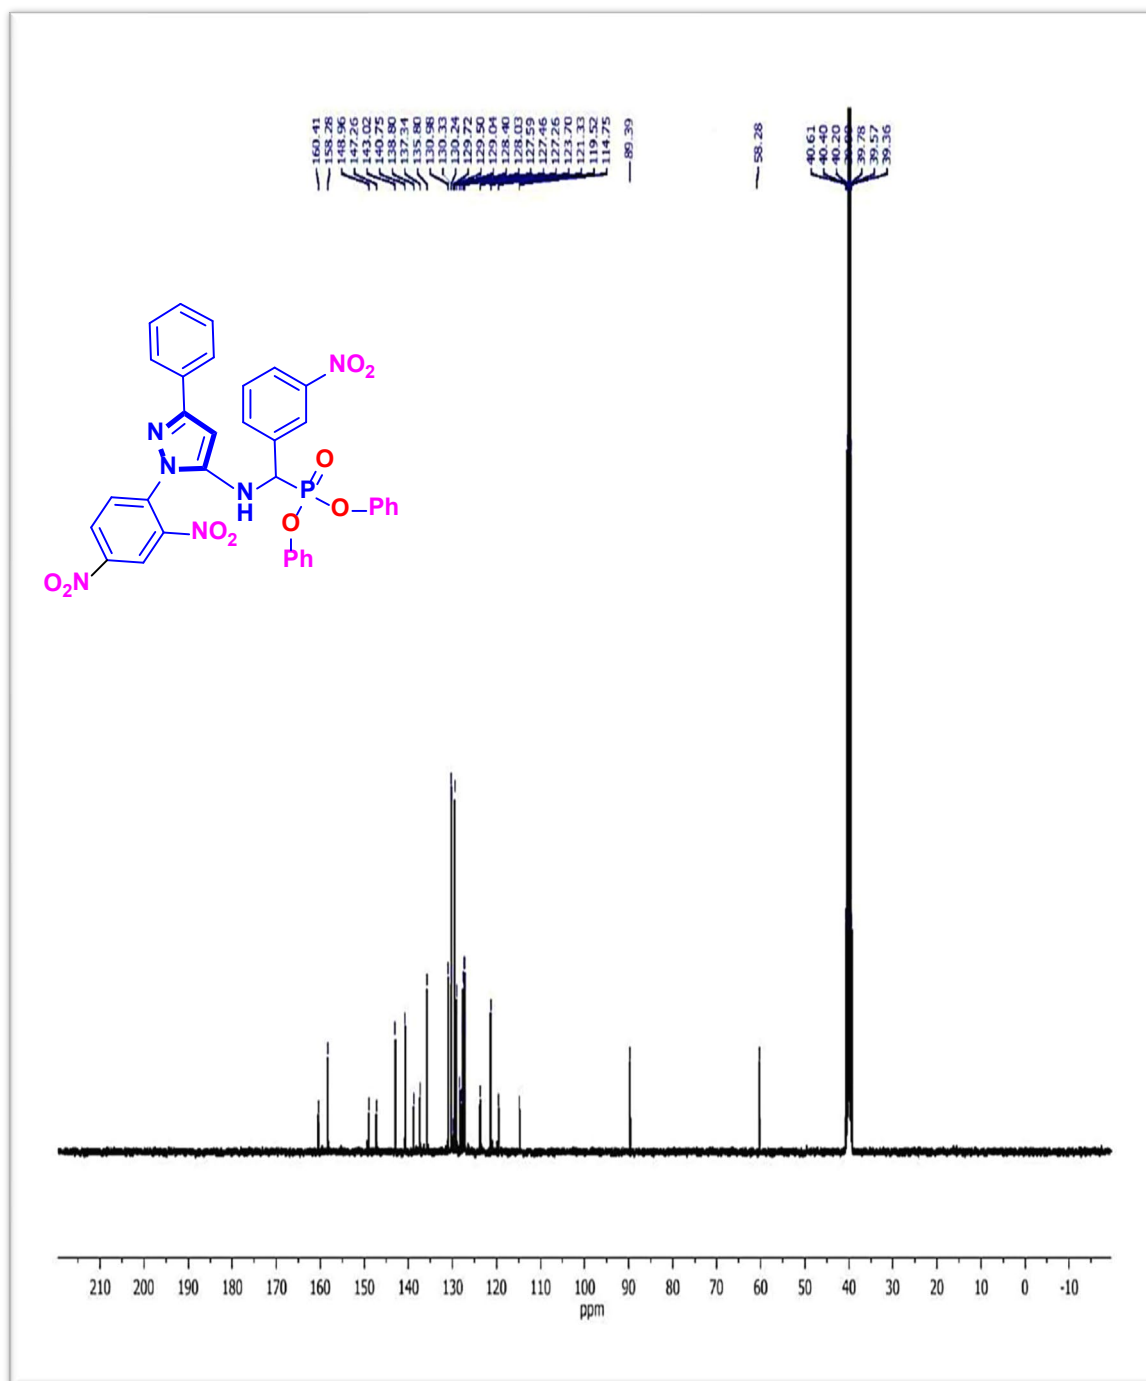

Fig. S26.  $^{13}\text{C}$ -NMR spectrum of  $\alpha$ -aminophosphonate **4c**.

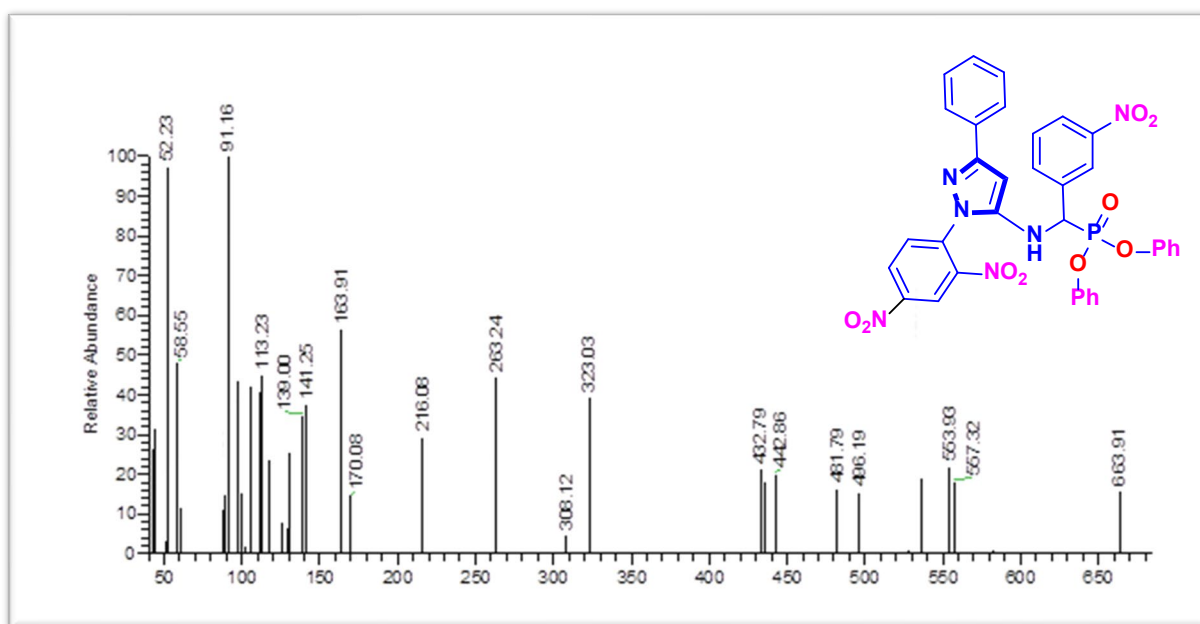

**Fig. S27.** Mass spectrum of  $\alpha$ -aminophosphonate **4c**

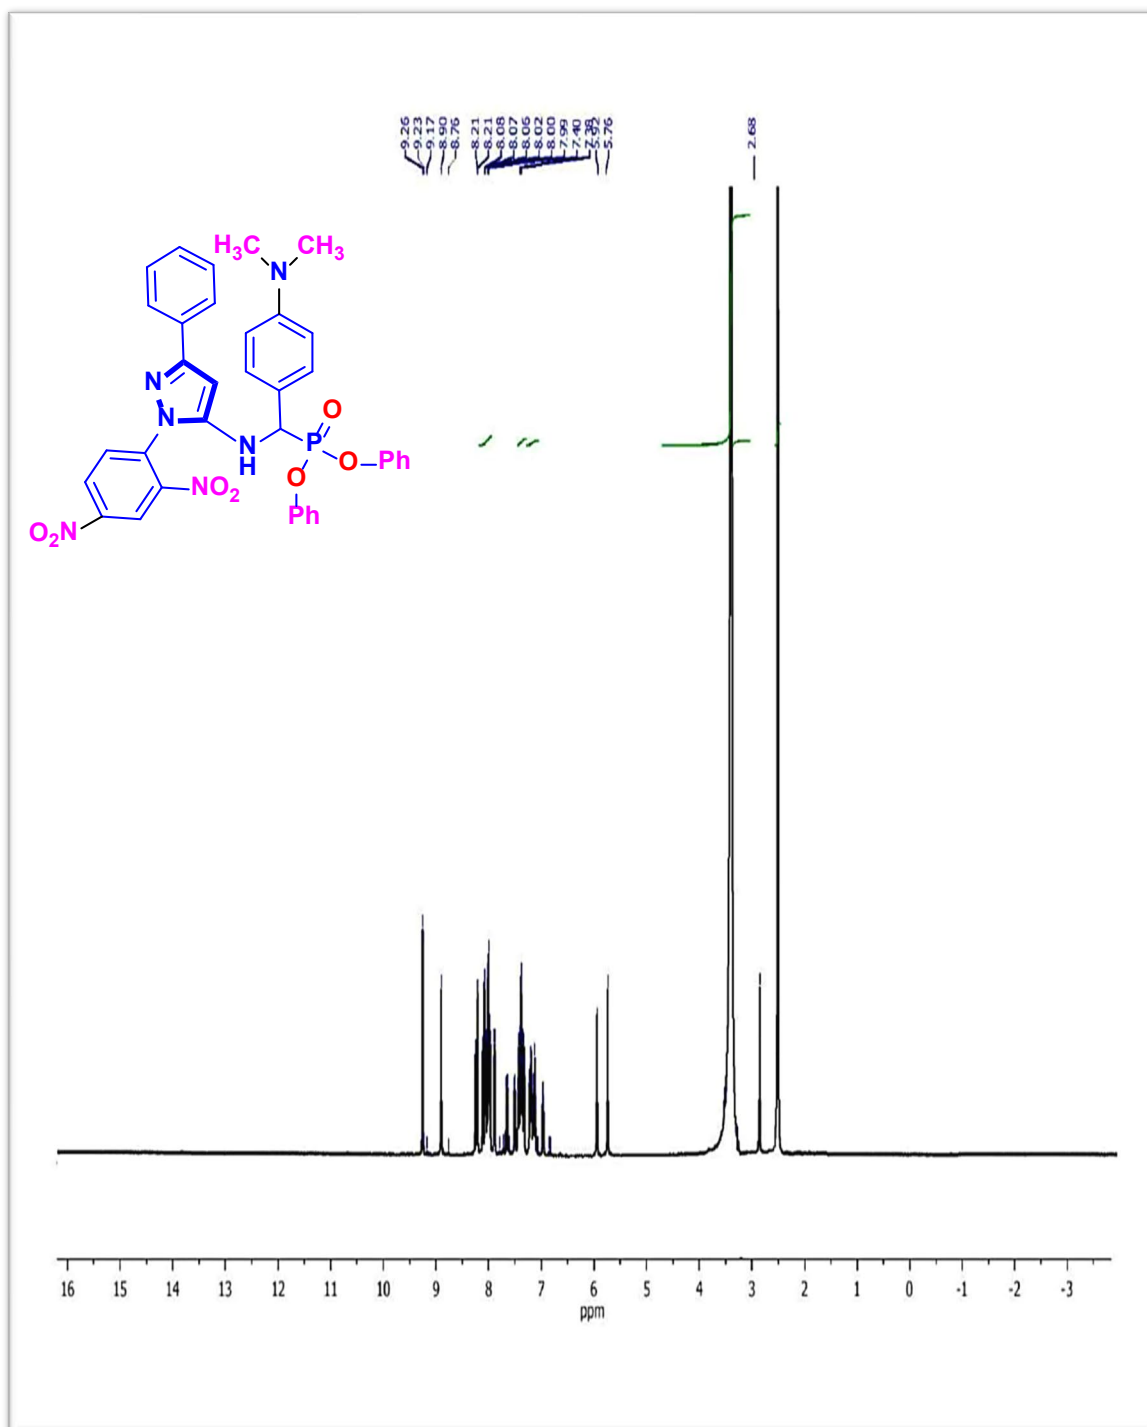

**Fig. S28.**  $^1\text{H-NMR}$  spectrum of  $\alpha$ -aminophosphonate **4d**.

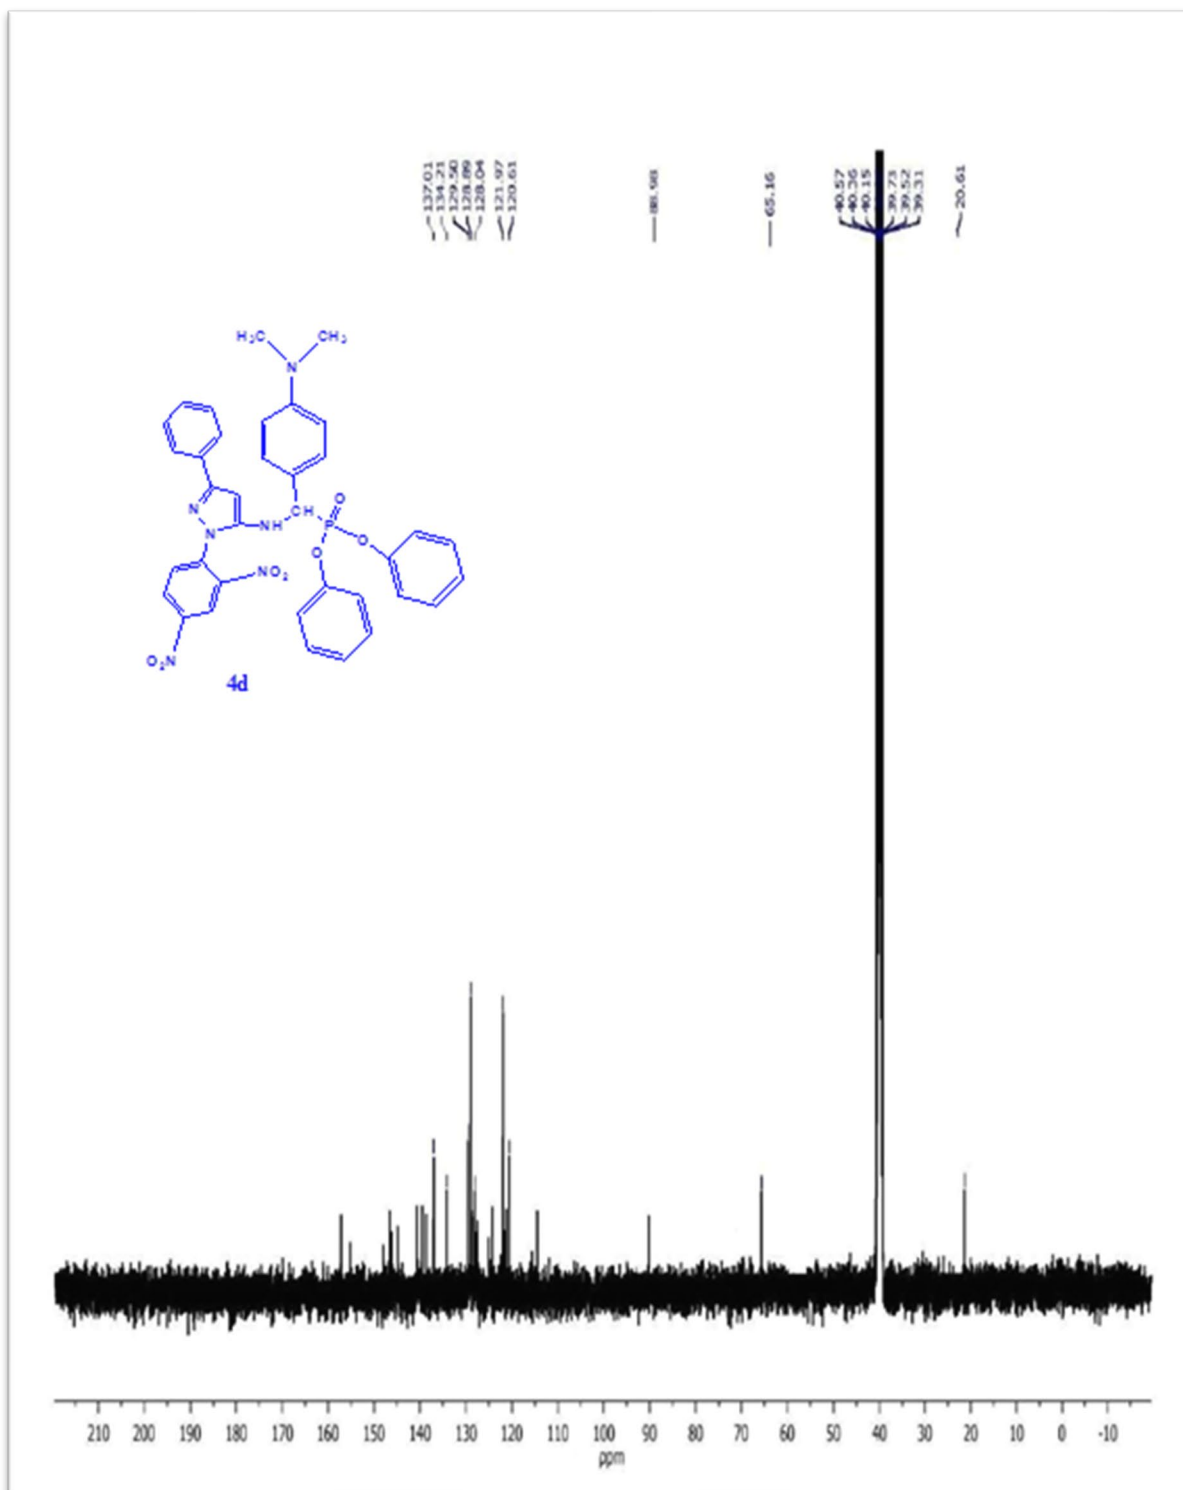

**Fig. S29.**  $^{13}\text{C}$ -NMR spectrum of  $\alpha$ -aminophosphonate **4d**.

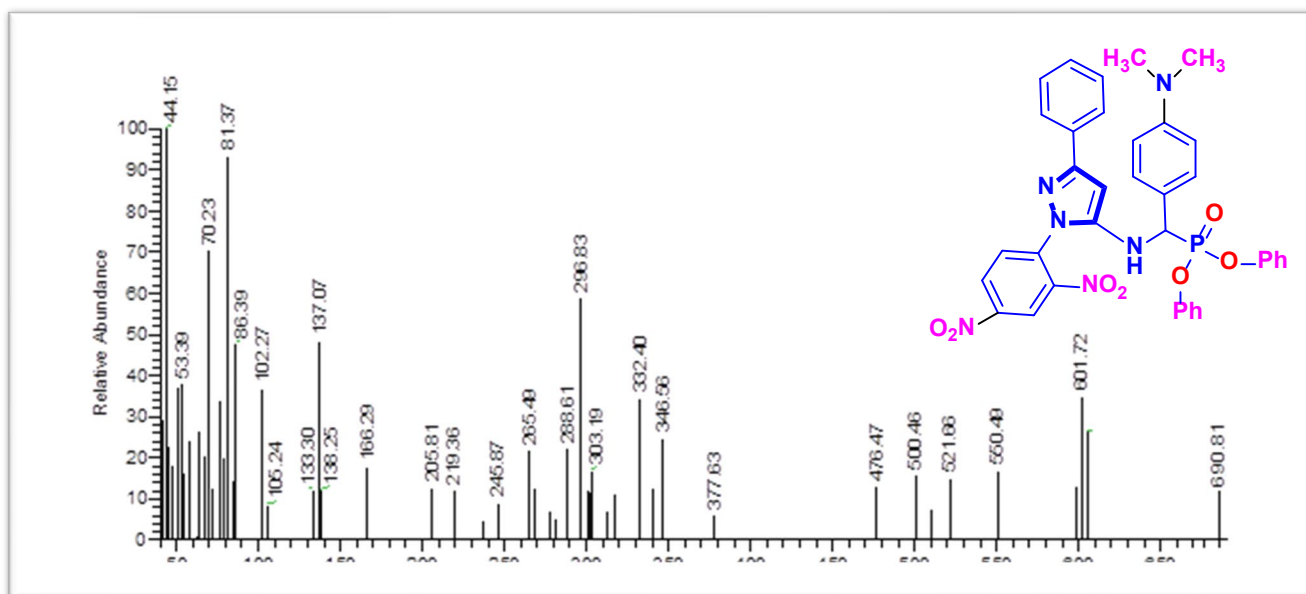

**Fig. S30.** Mass spectrum of  $\alpha$ -aminophosphonate **4d**



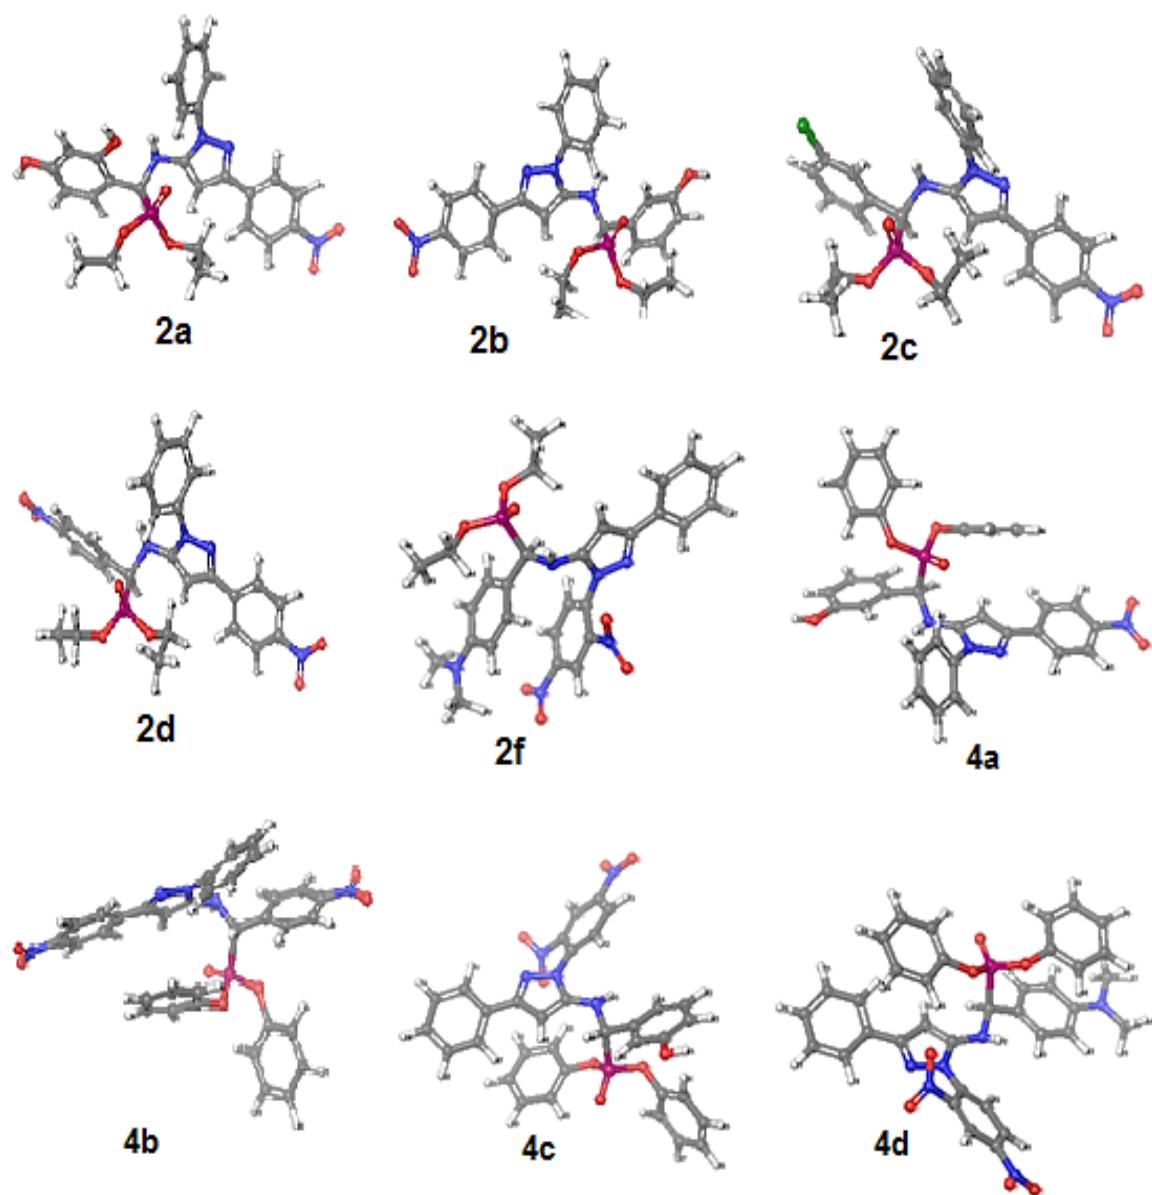

Fig.S31. Optimized molecular structure of  $\alpha$ -aminophosphonates.

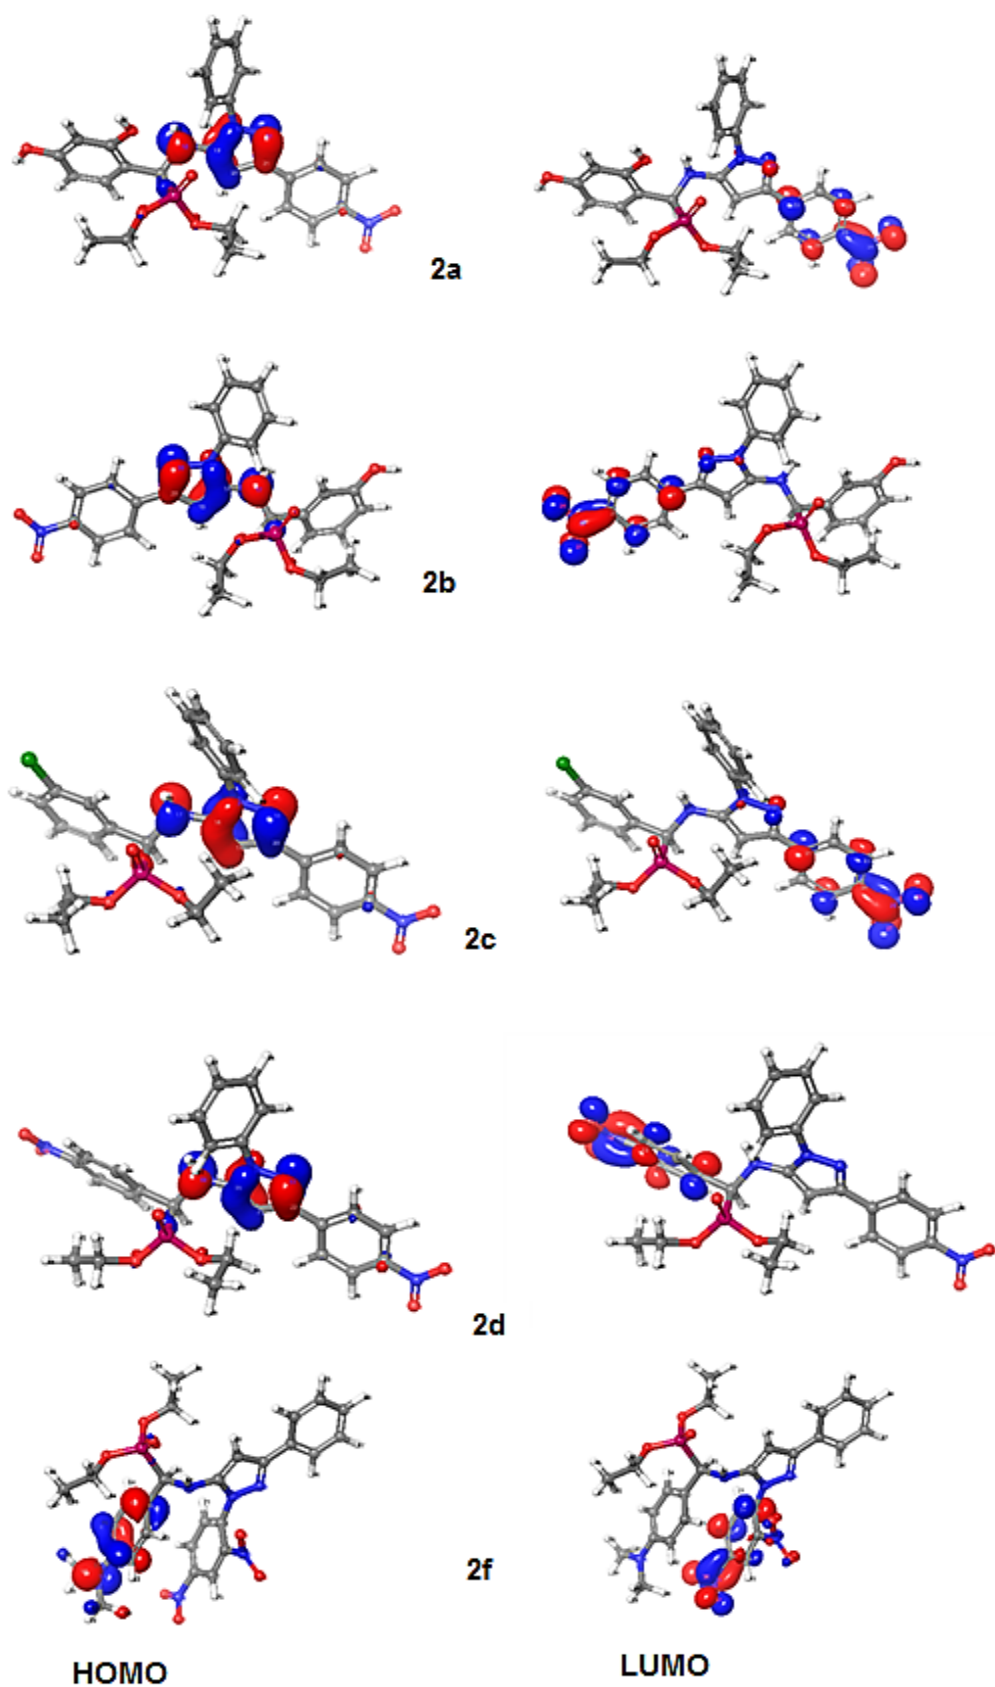

**Fig. S32.** 3D plots frontier orbital energies HOMO and LUMO using DFT method for  $\alpha$ -aminophosphonate **2a-2f**.

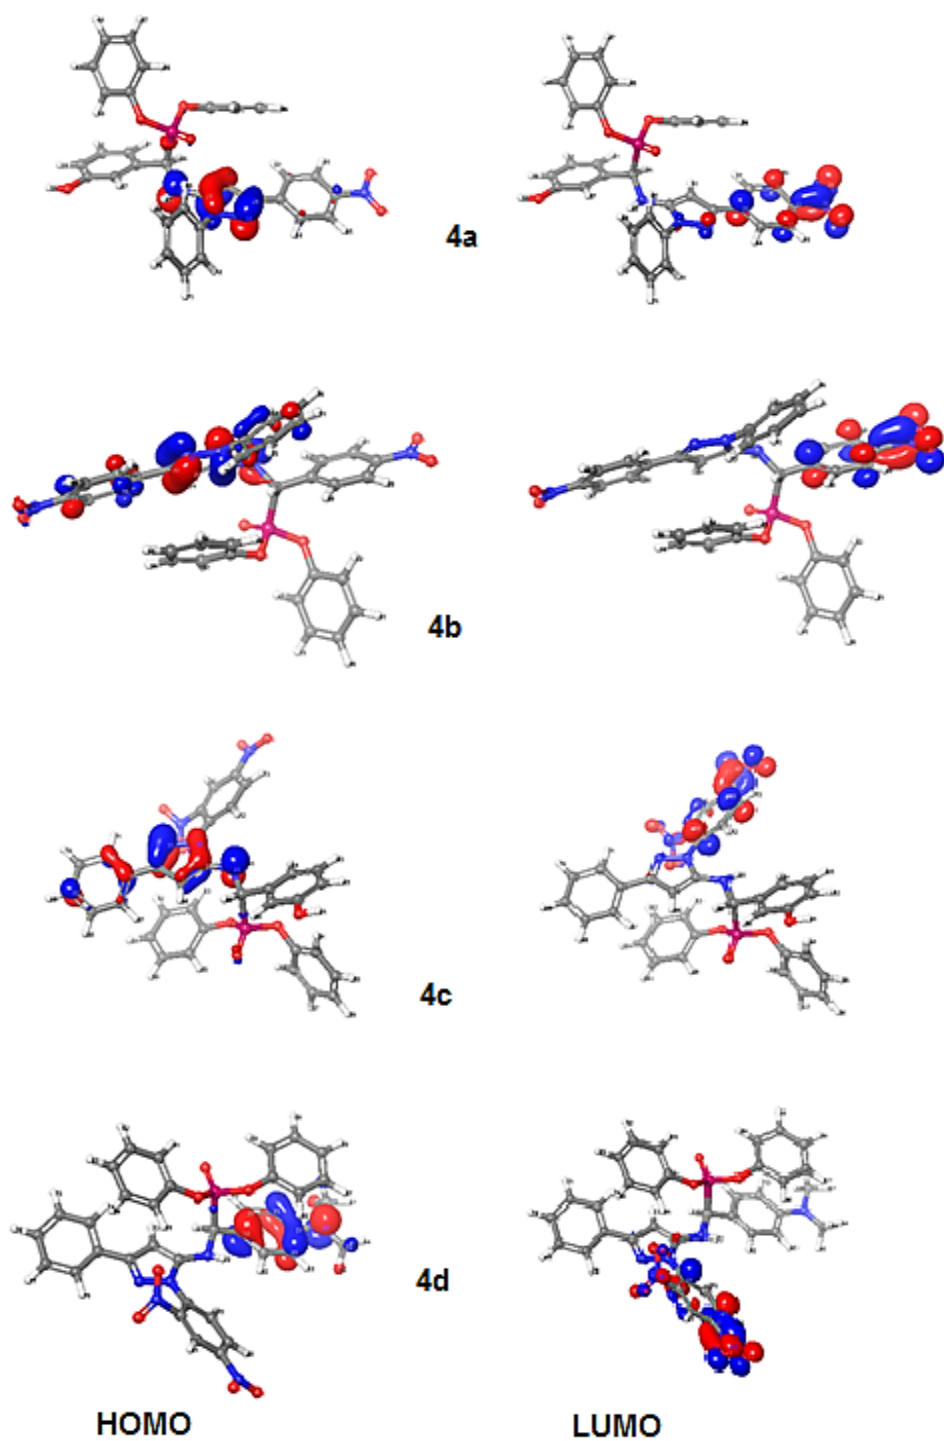

**Fig. S33.** 3D plots frontier orbital energies HOMO and LUMO using DFT method for  $\alpha$ -aminophosphonate **4a-4d**.

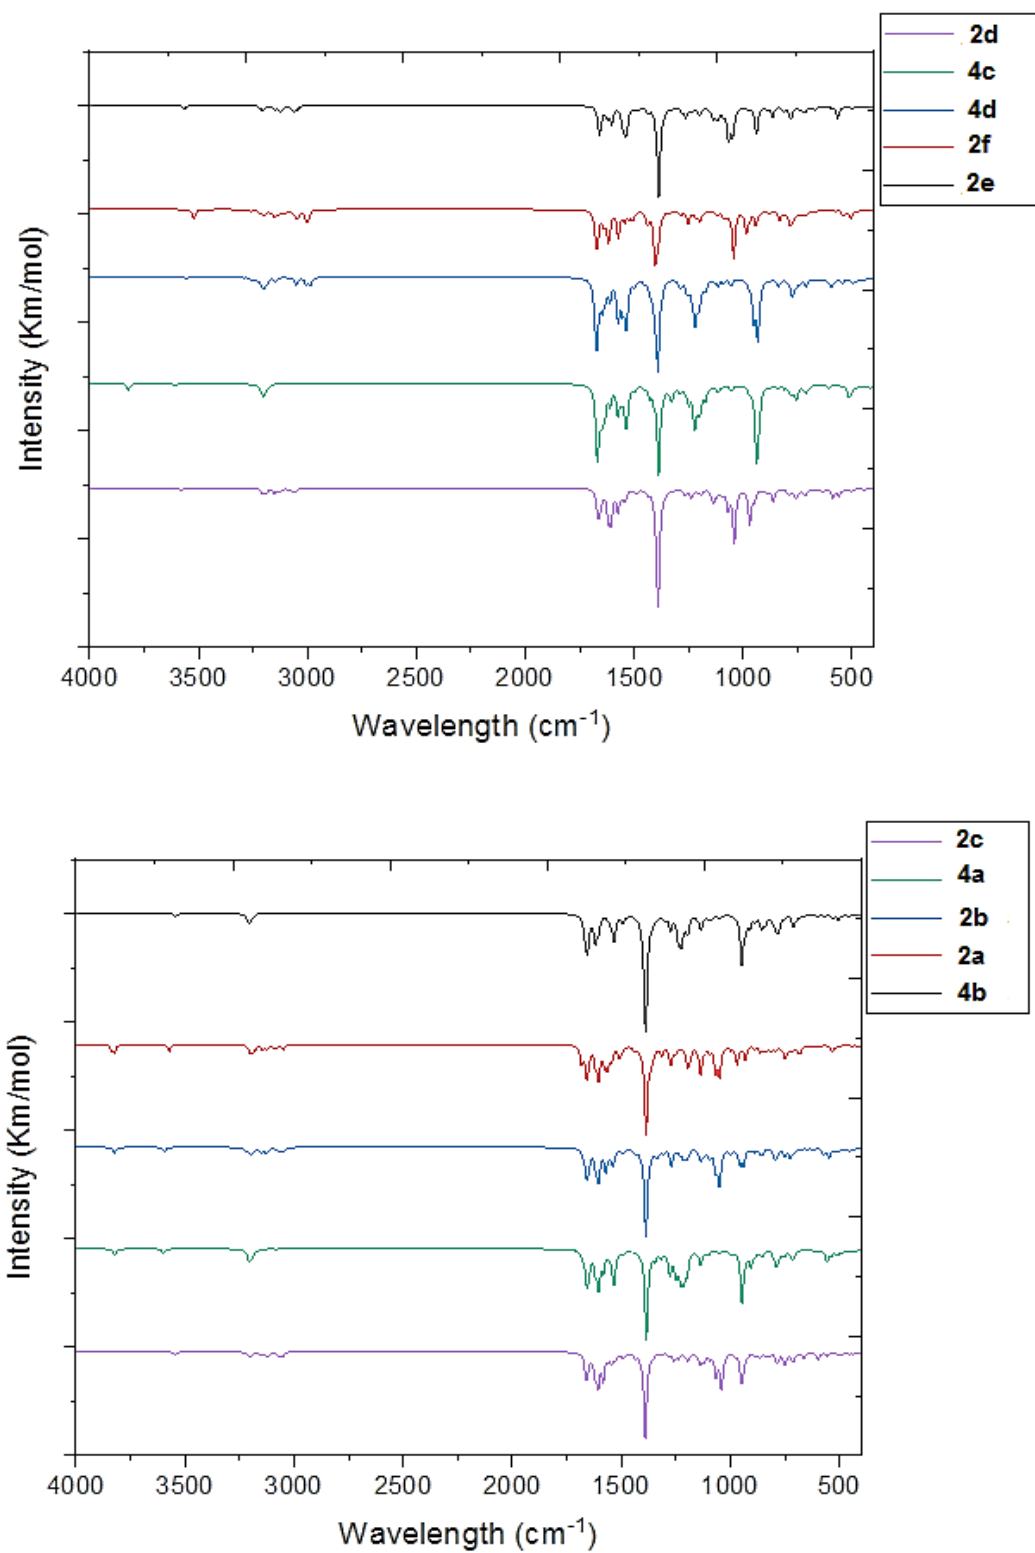

Fig. S34. the calculated IR spectra of  $\alpha$ -aminophosphonates **2a-2f** and **4a-4d**.

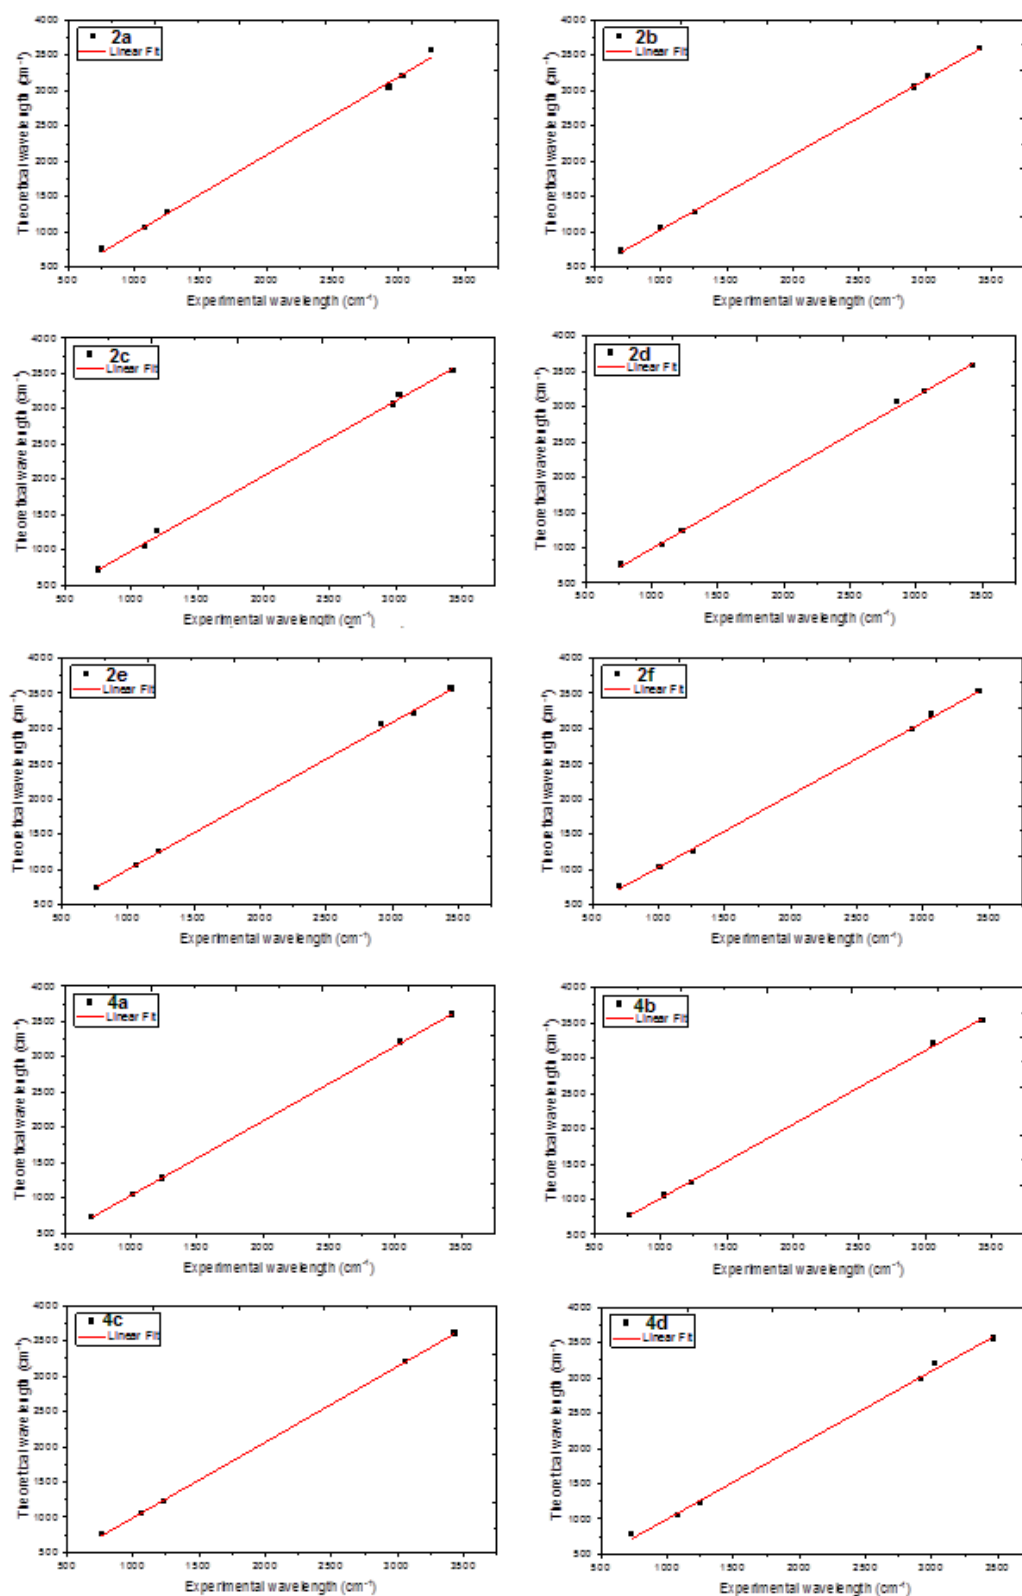

Fig. S35. The linear regression between the experimental and theoretical frequencies of  $\alpha$ -aminophosphonates **2a-2f** and **4a-4d**.

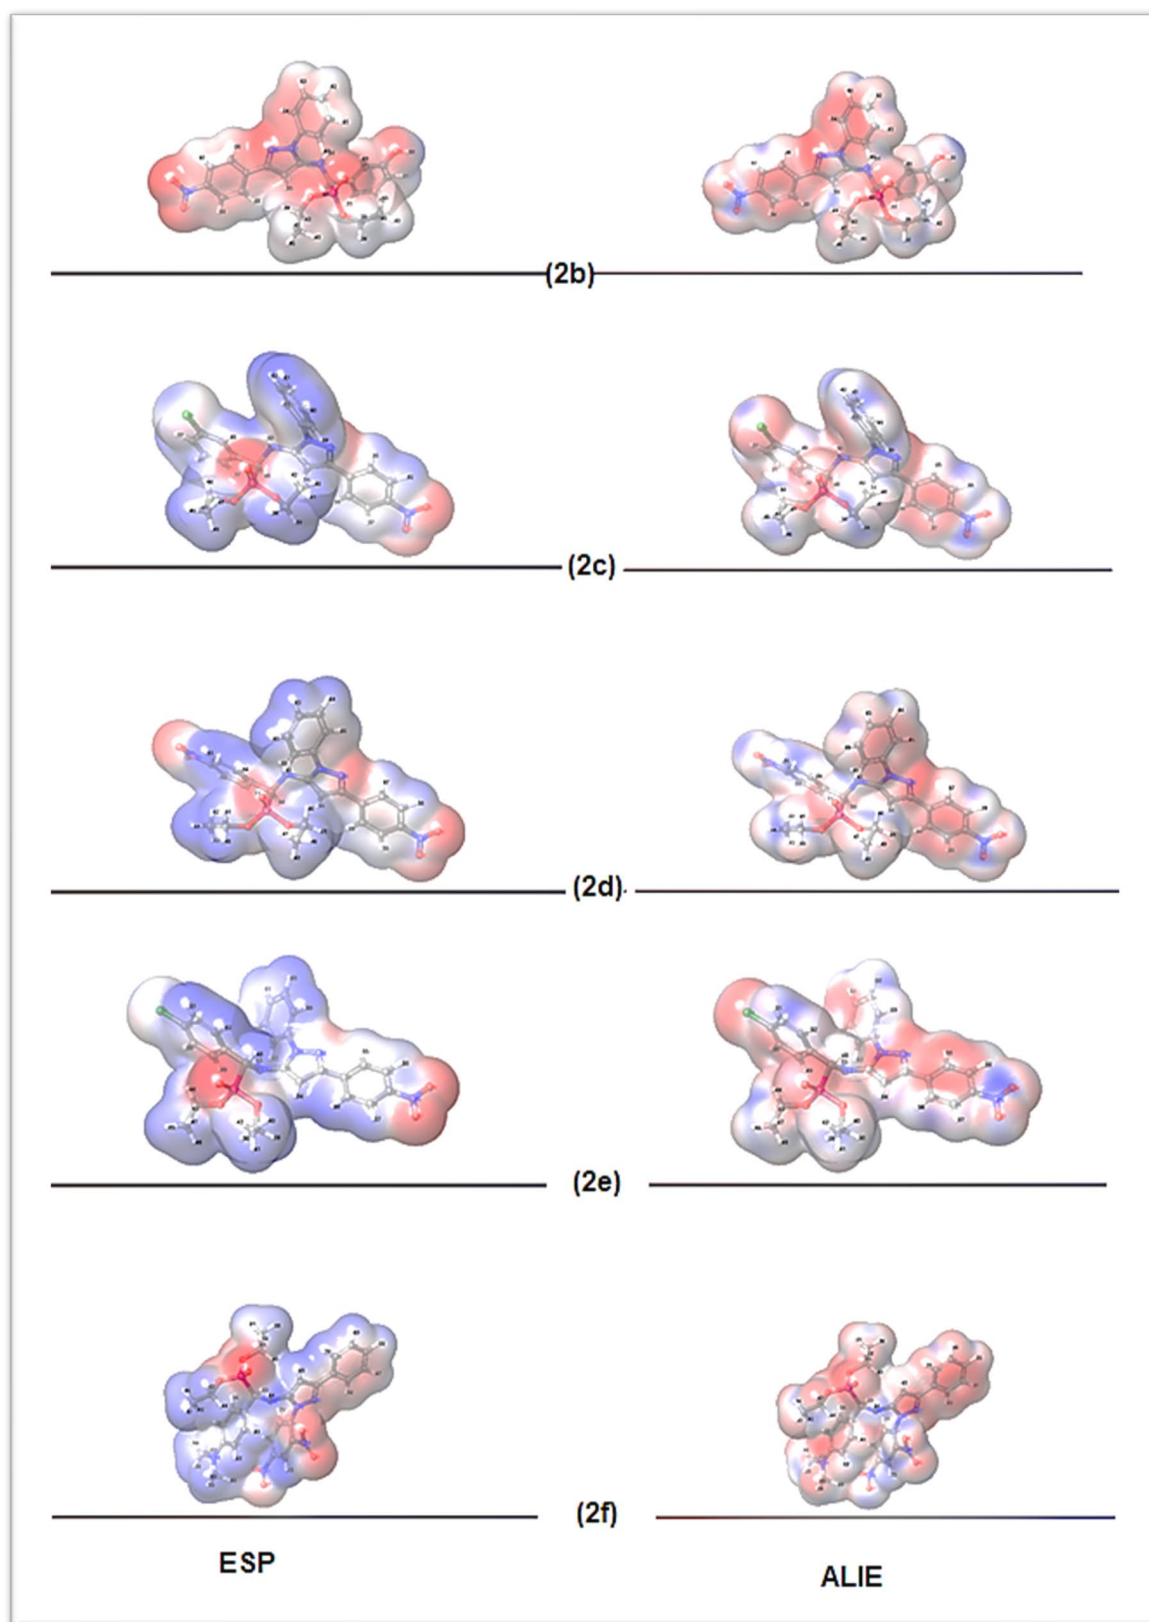

**Fig. S36.** Surface structure of ESP and ALIE using DFT method for  $\alpha$ -aminophosphonates **2b-2f**.

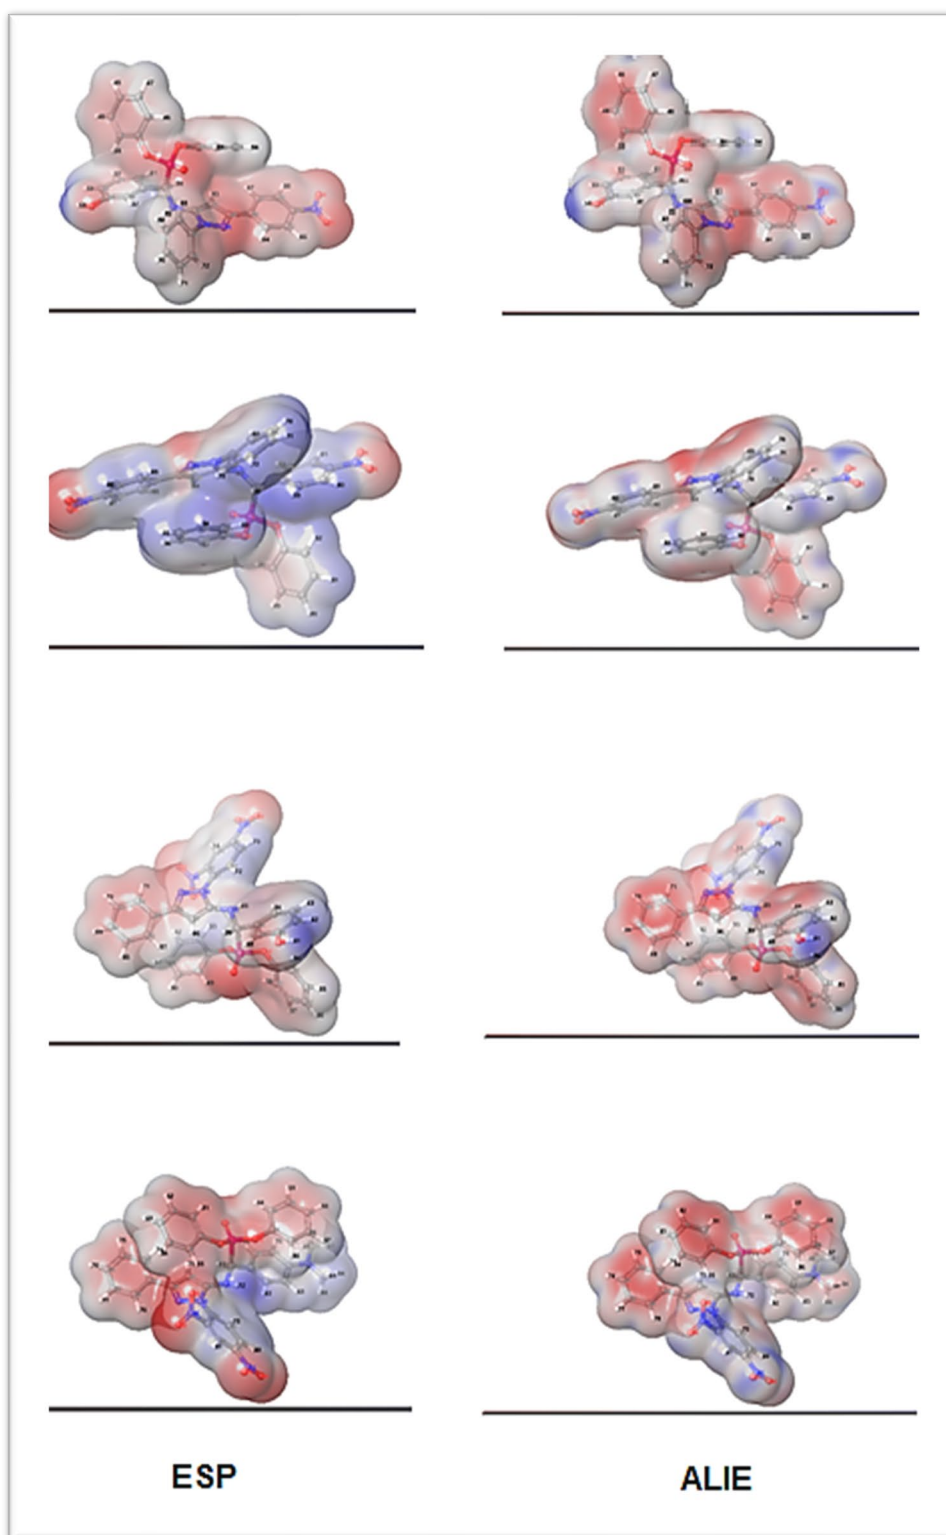

**Fig. S37.** Surface structure of ESP and ALIE using DFT method for  $\alpha$ -aminophosphonates **4a-4d**.

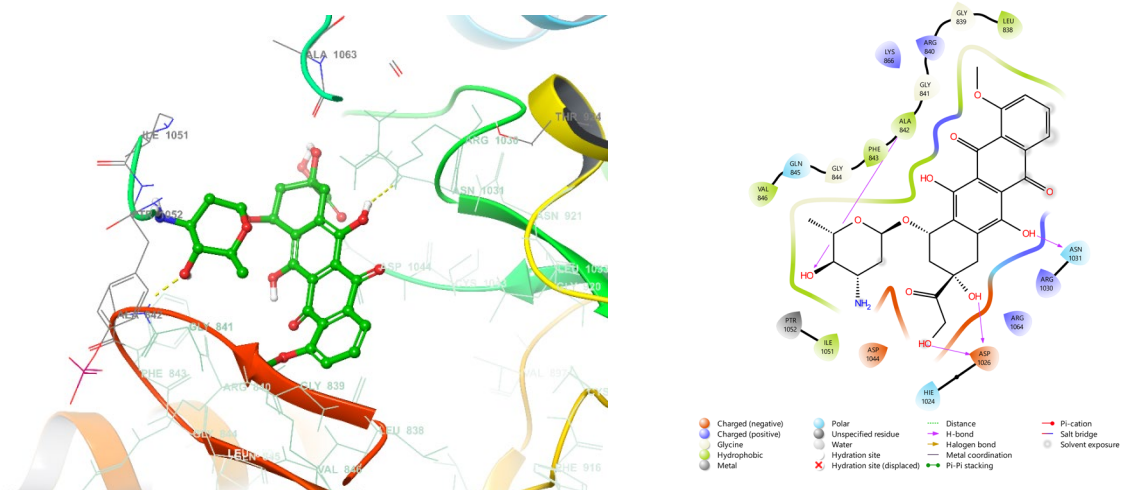

**Fig. S38.** 3D and 2D molecular interaction of **Doxorubicin** to inhibitory activity to the VEGFR-2 protein.

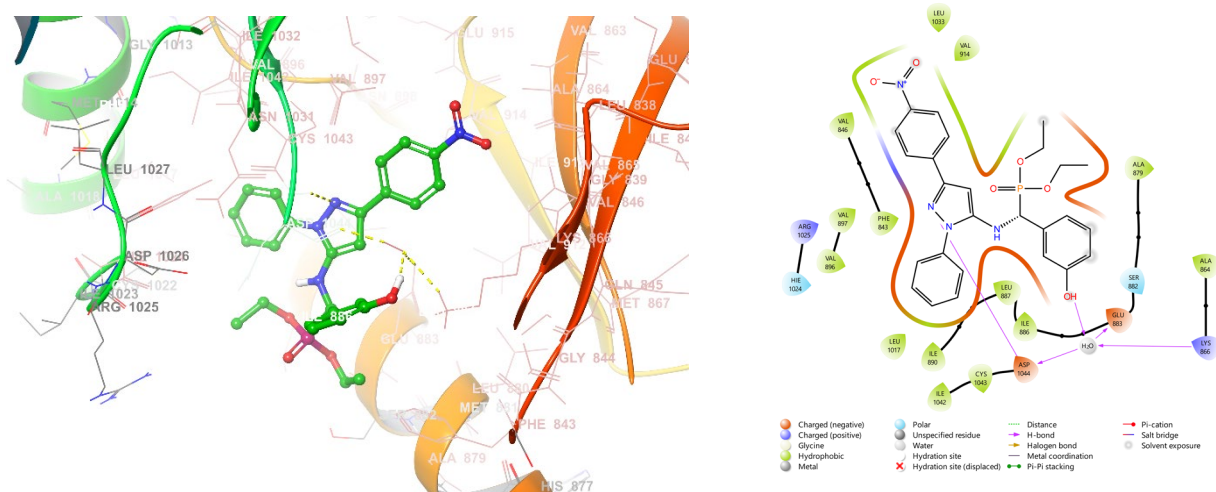

**Fig. S39.** 3D and 2D molecular interaction of **2b** to inhibitory activity to the VEGFR-2 protein.

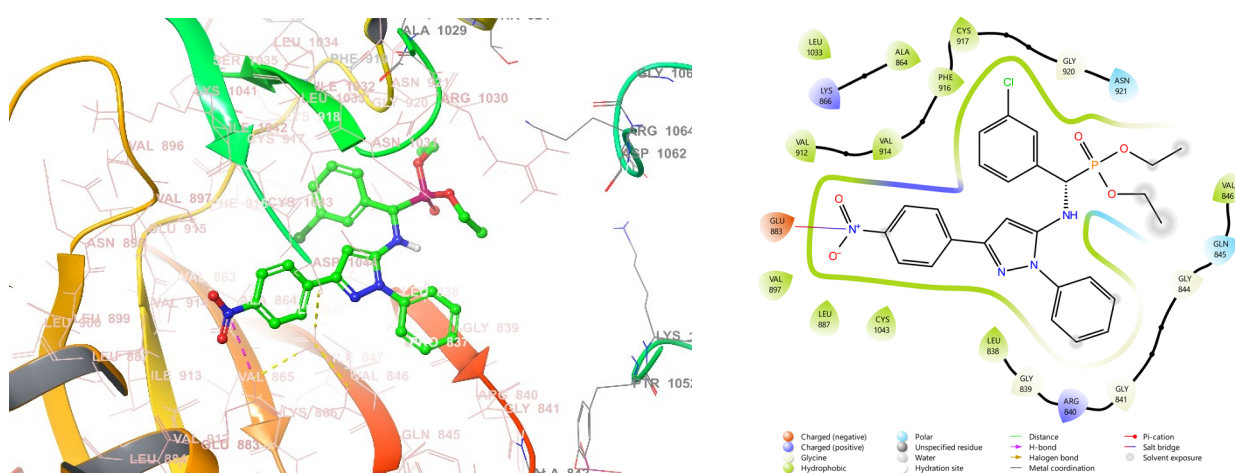

**Fig. S40.** 3D and 2D molecular interaction of **2c** to inhibitory activity to the VEGFR-2 protein.



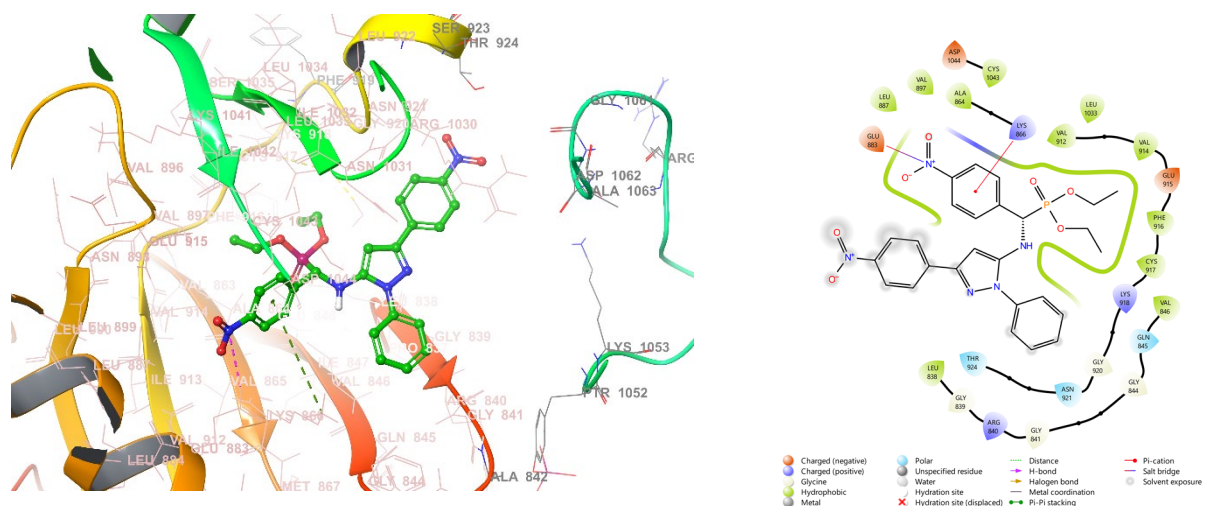

**Fig. S41.** 3D and 2D molecular interaction of **2d** to inhibitory activity to the VEGFR-2 protein.

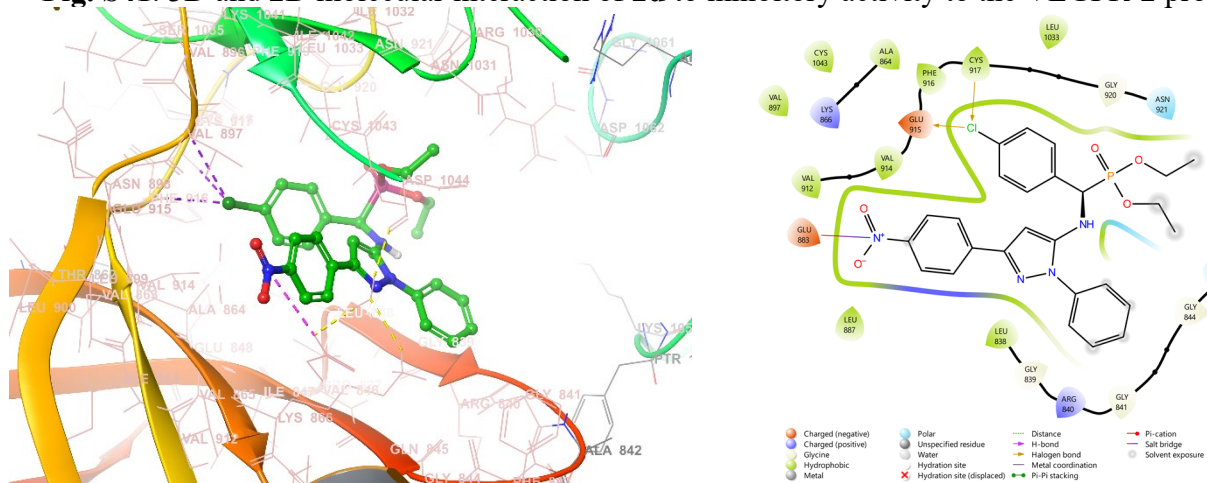

**Fig. S42.** 3D and 2D molecular interaction of **2e** to inhibitory activity to the VEGFR-2 protein.

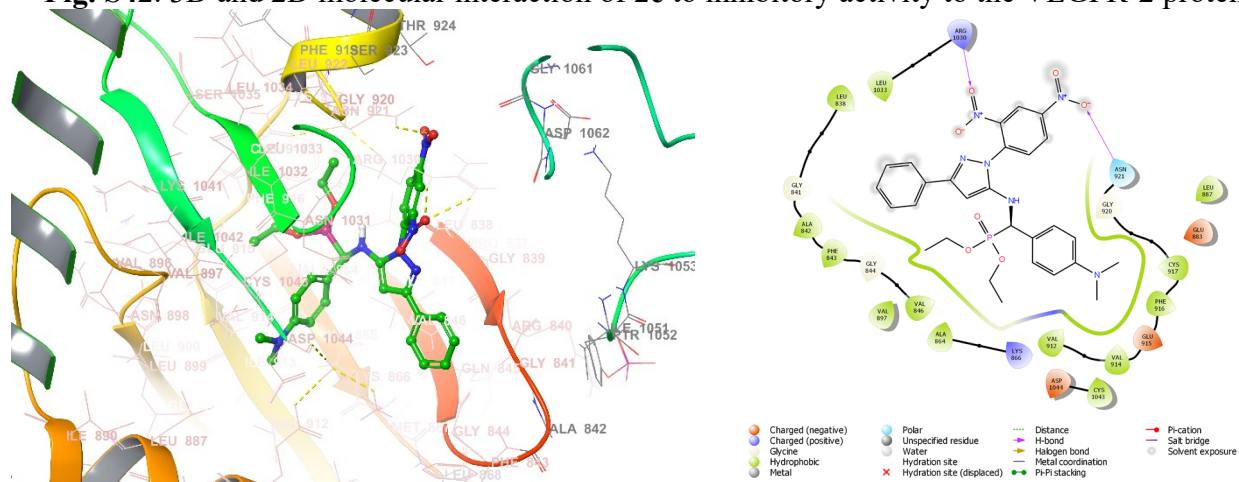

**Fig. 43.** 3D and 2D molecular interaction of **2f** to inhibitory activity to the VEGFR-2 protein.

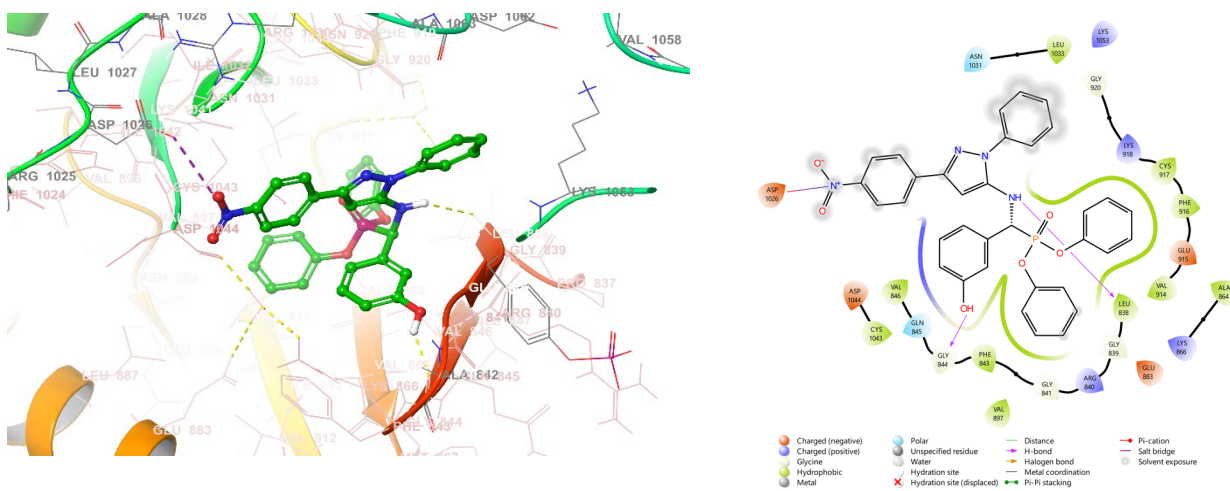

**Fig. S44.** 3D and 2D molecular interaction of **4a** to inhibitory activity to the VEGFR-2 protein.

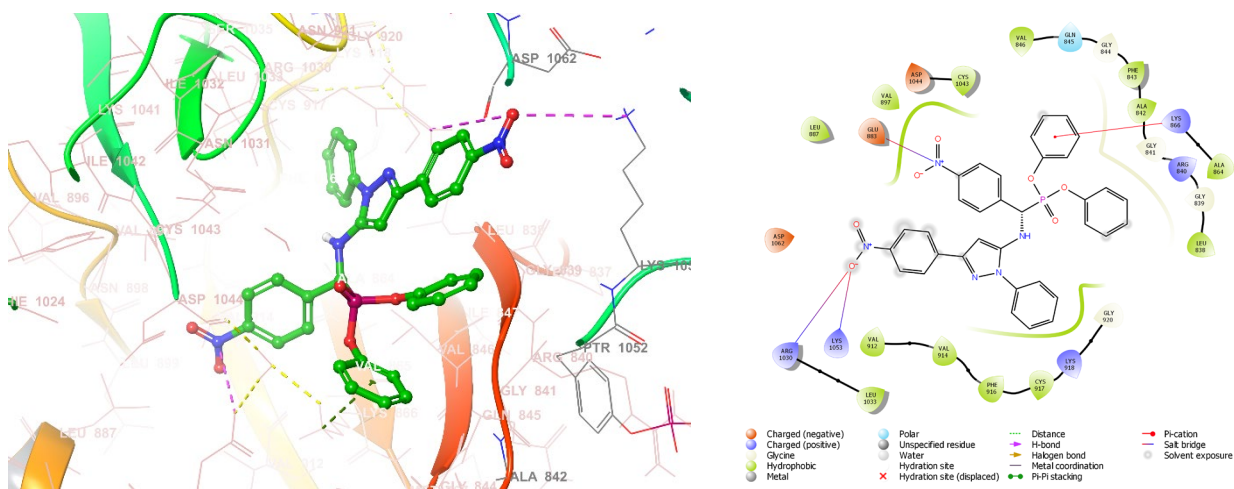

**Fig. S45.** 3D and 2D molecular interaction of **4b** to inhibitory activity to the VEGFR-2 protein

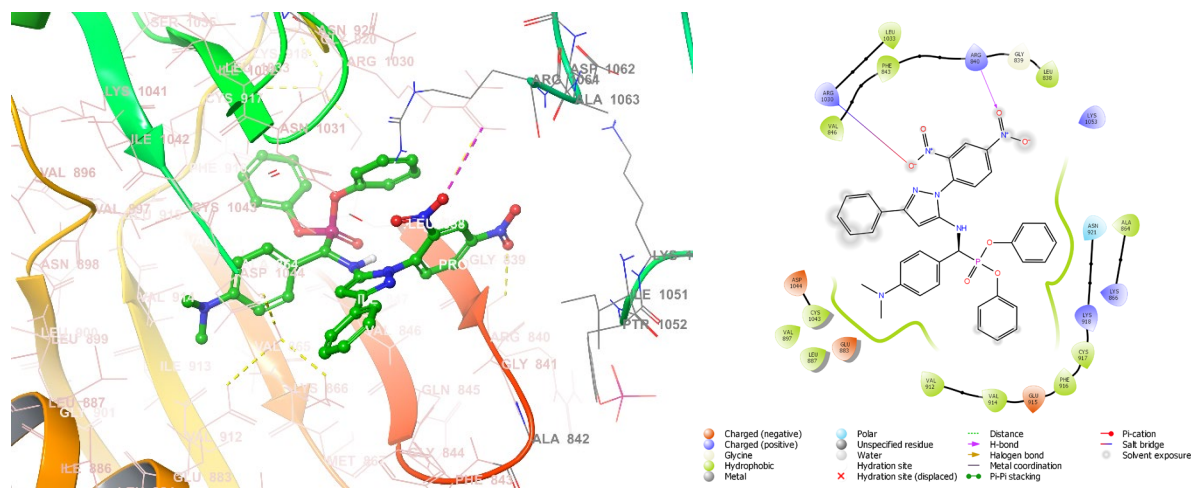

**Fig. S46.** 3D and 2D molecular interaction of **4d** to inhibitory activity to the VEGFR-2 protein.

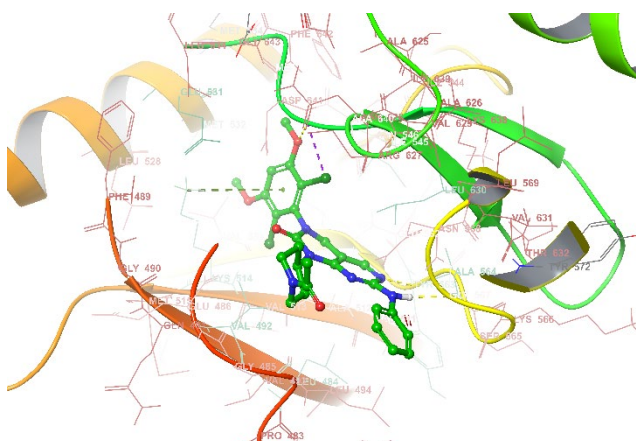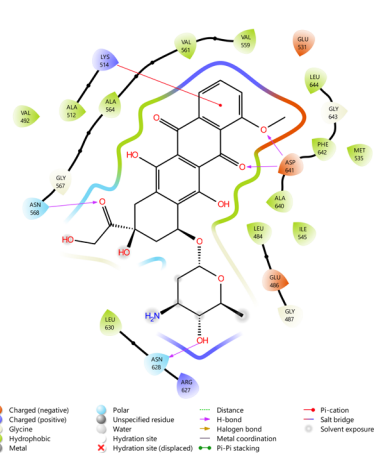

**Fig. S47.** 3D and 2D molecular interaction of **Doxorubicin** to inhibitory activity to the FGFR1 protein

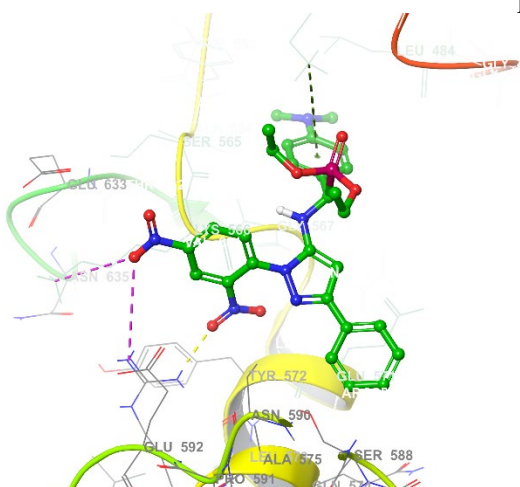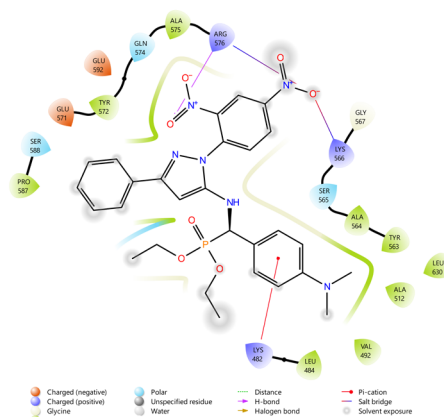

**Fig. S48.** 3D and 2D molecular interaction of **2f** to inhibitory activity to the FGFR1 protein

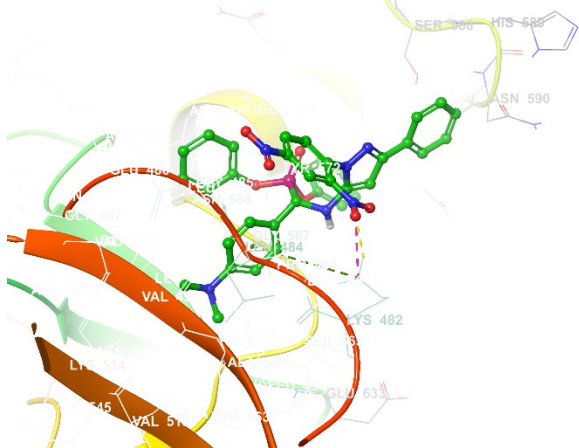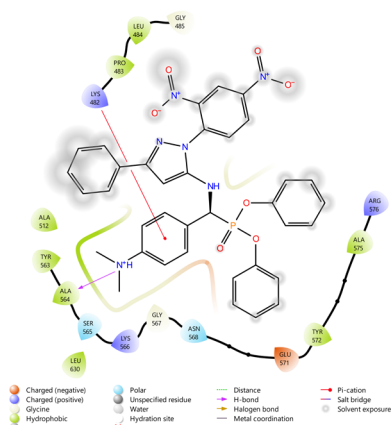

**Fig. S49.** 3D and 2D molecular interaction of **4d** to inhibitory activity to the FGFR1 protein

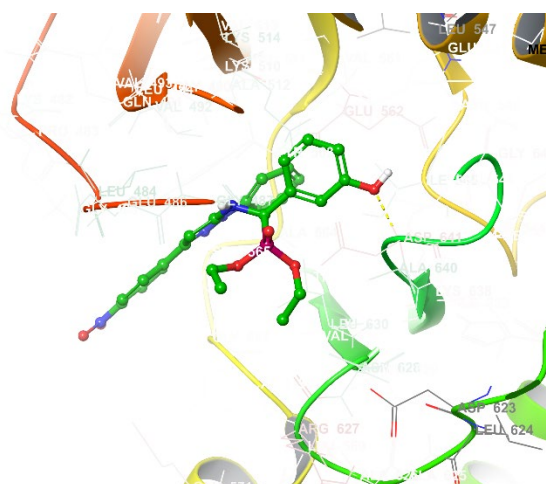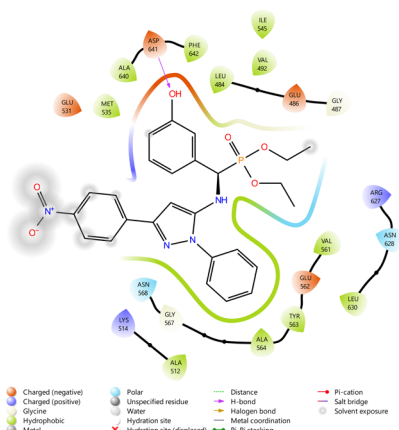

**Fig. S50.** 3D and 2D molecular interaction of **2b** to inhibitory activity to the FGFR1 protein

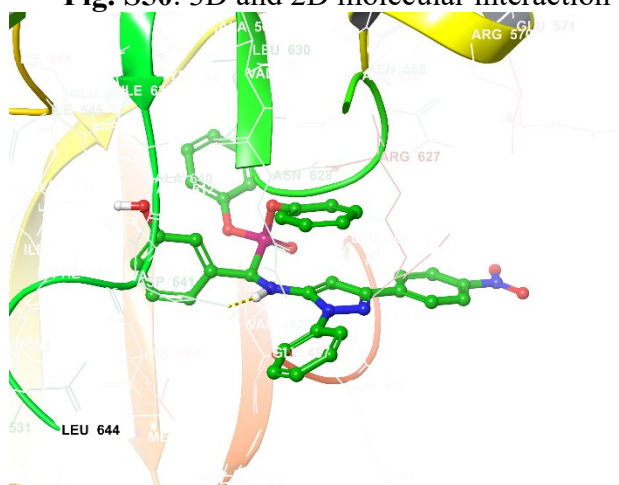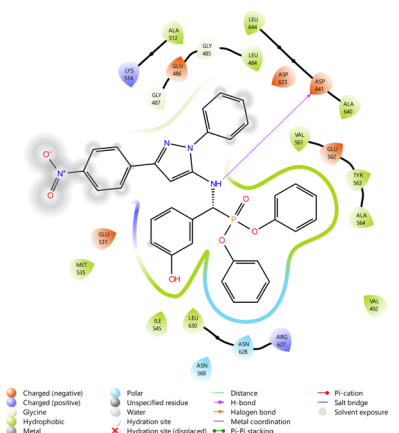

**Fig. S51.** 3D and 2D molecular interaction of **4a** to inhibitory activity to the FGFR1 protein

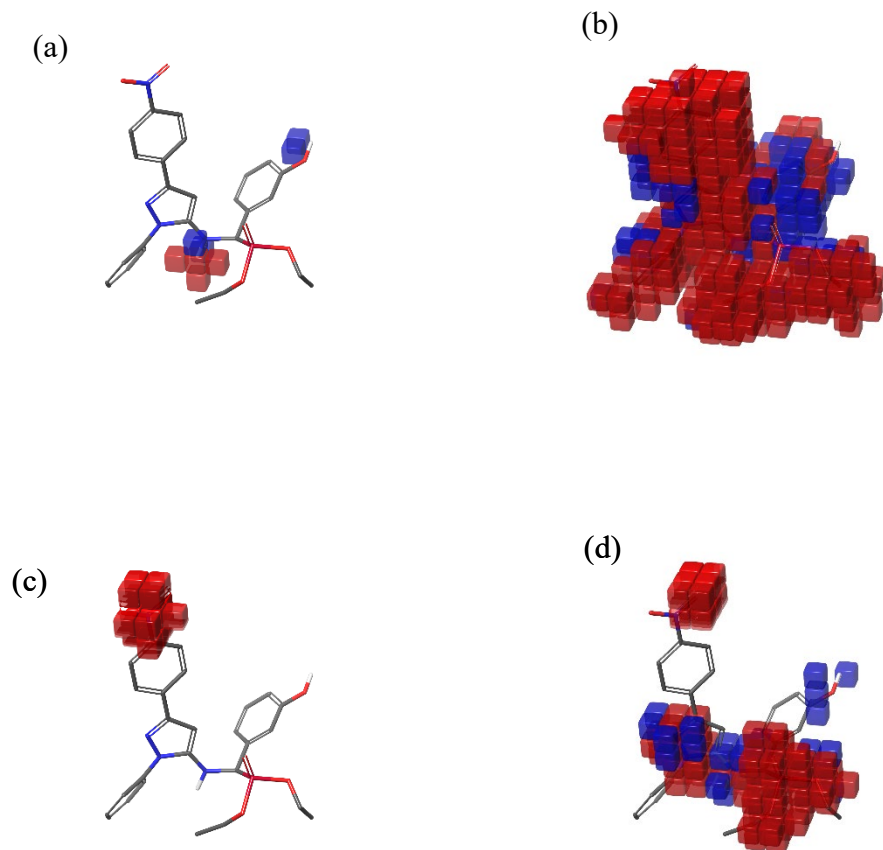

**Fig. S52.** QSAR models of compound 2b with VEGFR2 receptor inhibition for (a) hydrogen bond donor effect, (b) hydrophobic effect, (c) positive ionic effect, and (d) electron withdrawing effect.

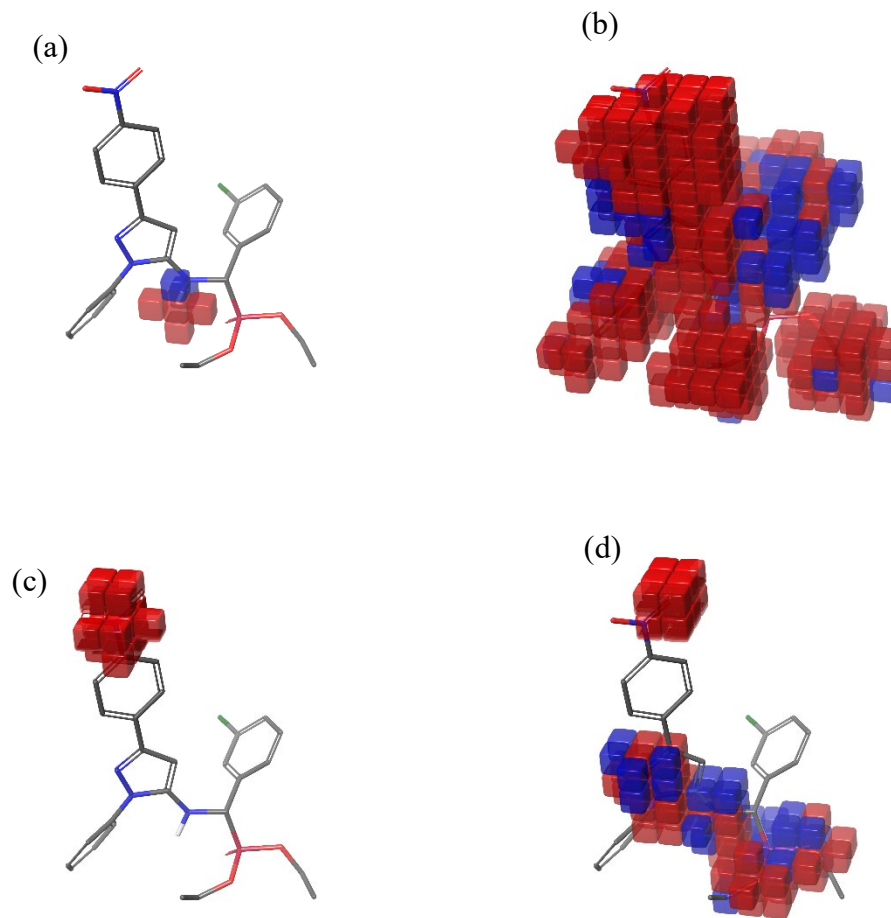

**Fig. S53.** QSAR models of compound 2c with VEGFR2 receptor inhibition for (a) hydrogen bond donor effect, (b) hydrophobic effect, (c) positive ionic effect, and (d) electron withdrawing effect.

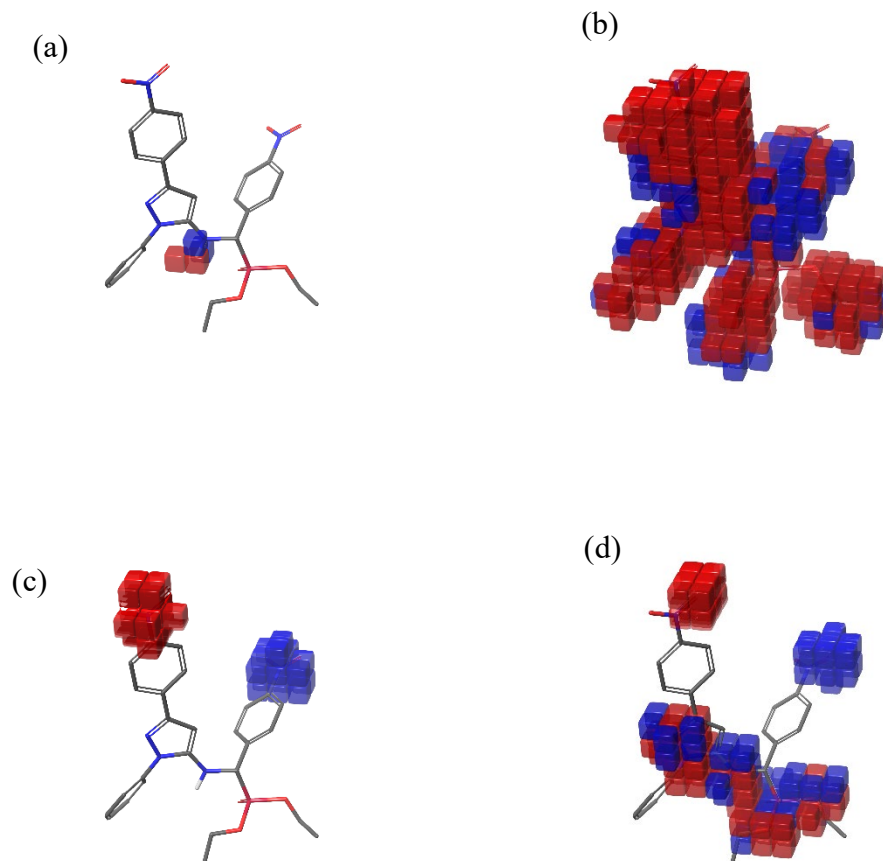

**Fig. S54.** QSAR models of compound 2d with VEGFR2 receptor inhibition for (a) hydrogen bond donor effect, (b) hydrophobic effect, (c) positive ionic effect, and (d) electron withdrawing effect.

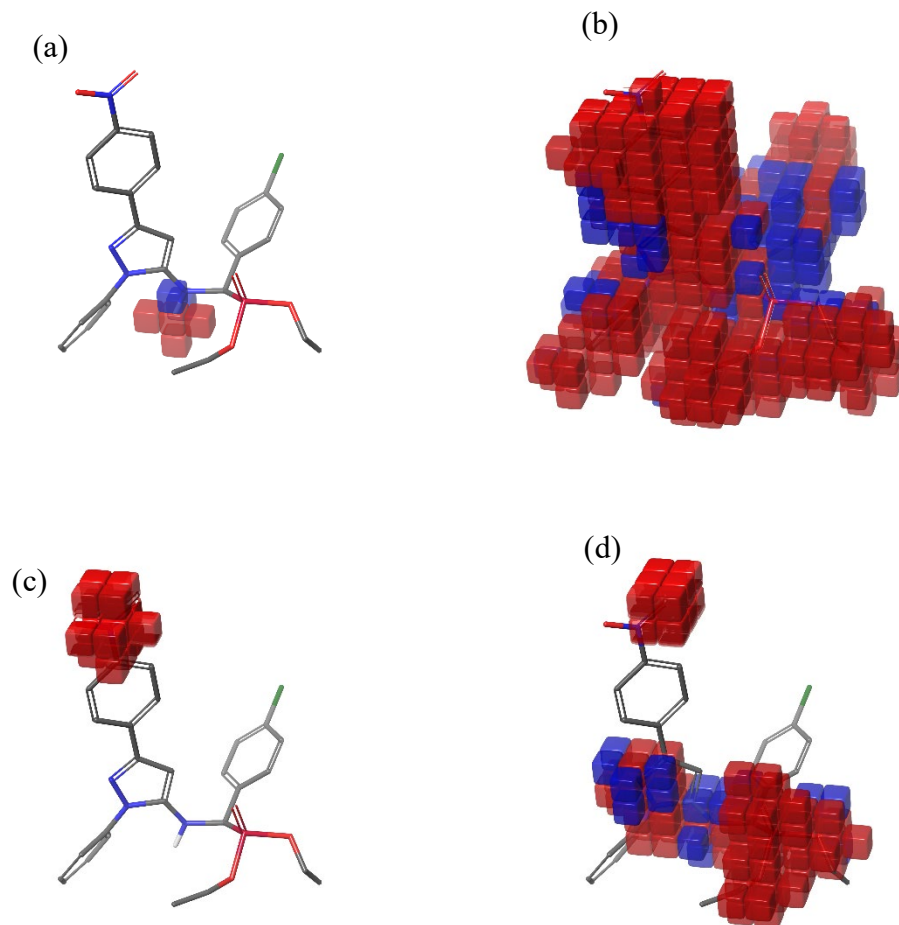

**Fig. S55.** QSAR models of compound 2e with VEGFR2 receptor inhibition for (a) hydrogen bond donor effect, (b) hydrophobic effect, (c) positive ionic effect, and (d) electron withdrawing effect.



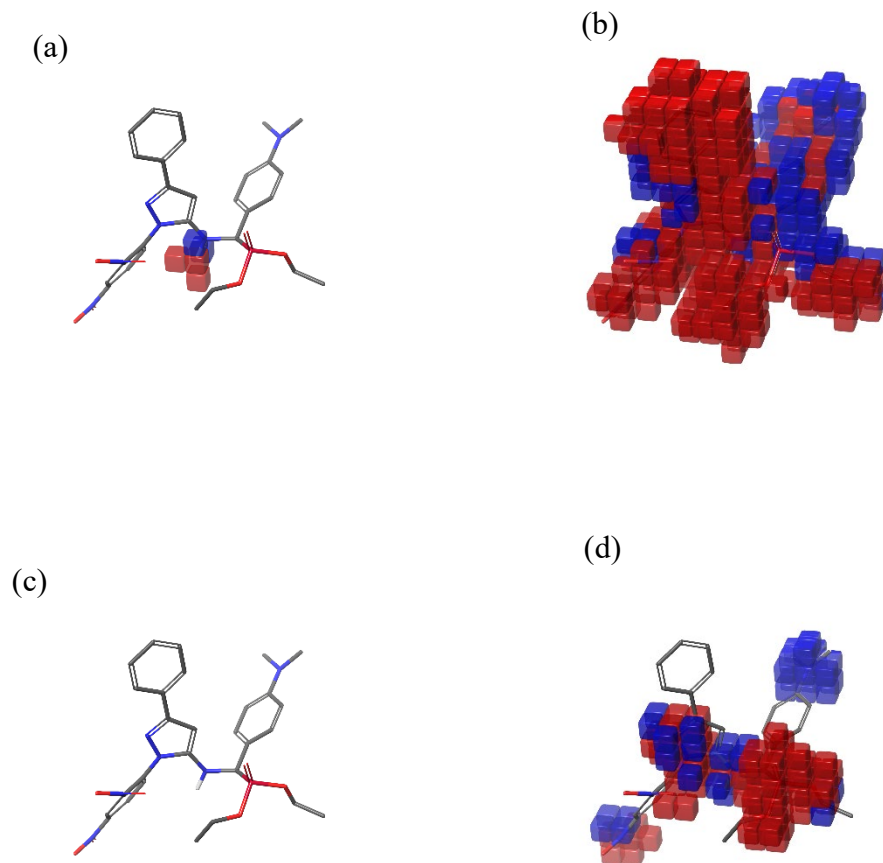

**Fig. S56.** QSAR models of compound 2f with VEGFR2 receptor inhibition for (a) hydrogen bond donor effect, (b) hydrophobic effect, (c) positive ionic effect, and (d) electron withdrawing effect.

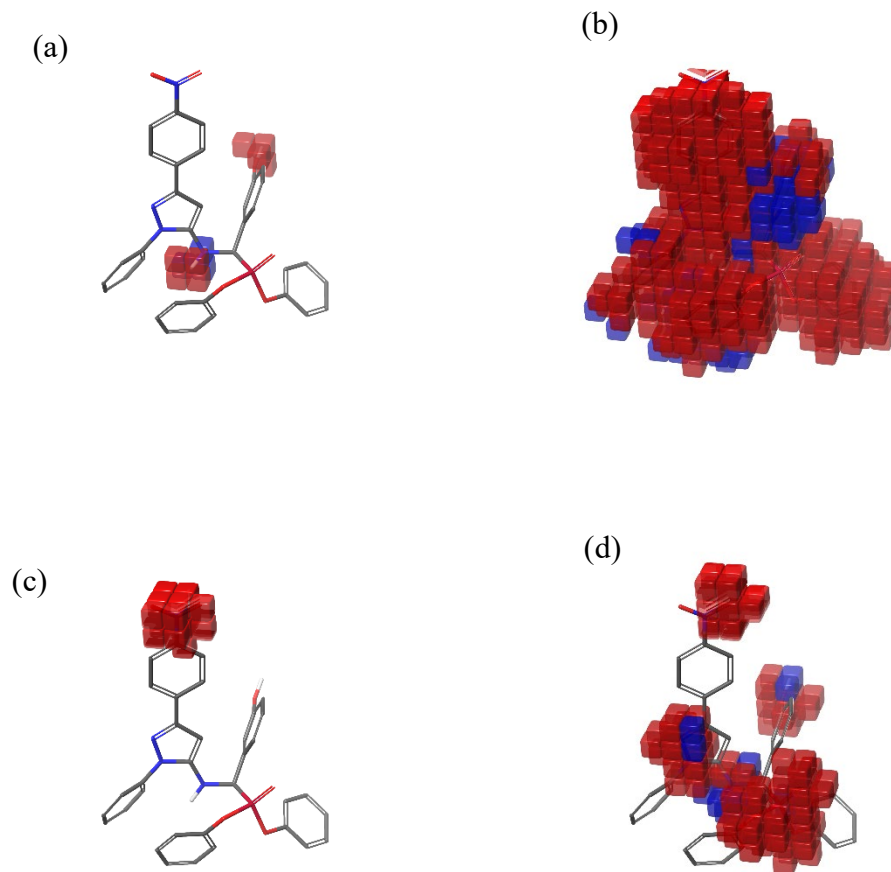

**Fig. S57.** QSAR models of compound 4a with VEGFR2 receptor inhibition for (a) hydrogen bond donor effect, (b) hydrophobic effect, (c) positive ionic effect, and (d) electron withdrawing effect.

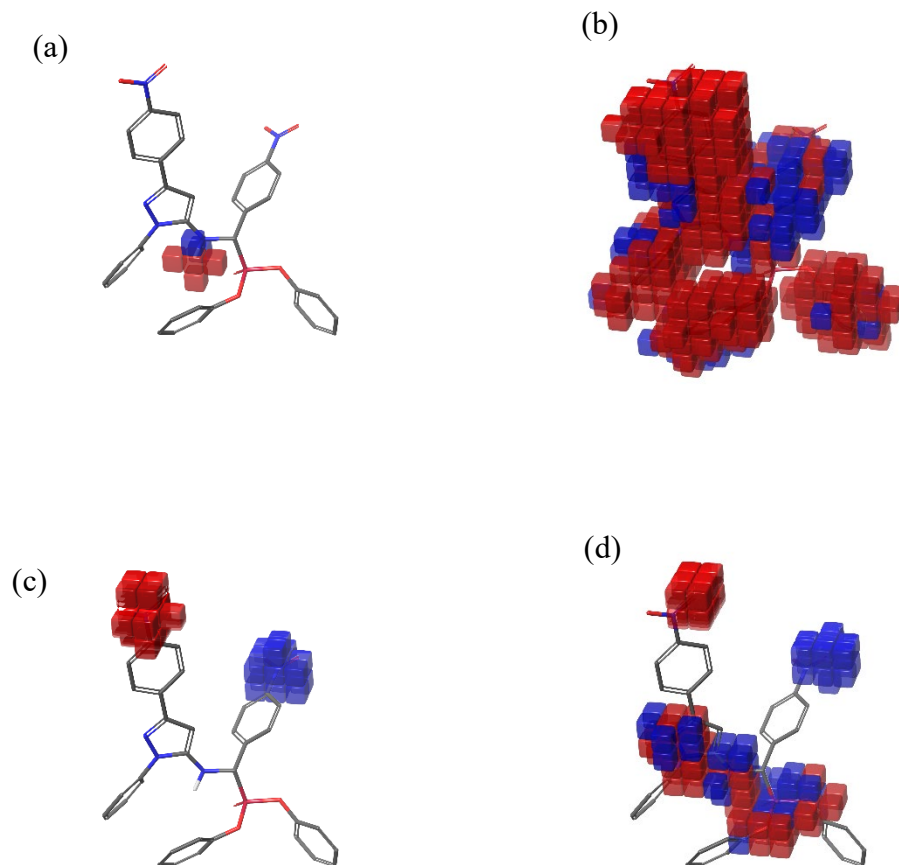

**Fig. S58.** QSAR models of compound 4b with VEGFR2 receptor inhibition for (a) hydrogen bond donor effect, (b) hydrophobic effect, (c) positive ionic effect, and (d) electron withdrawing effect.

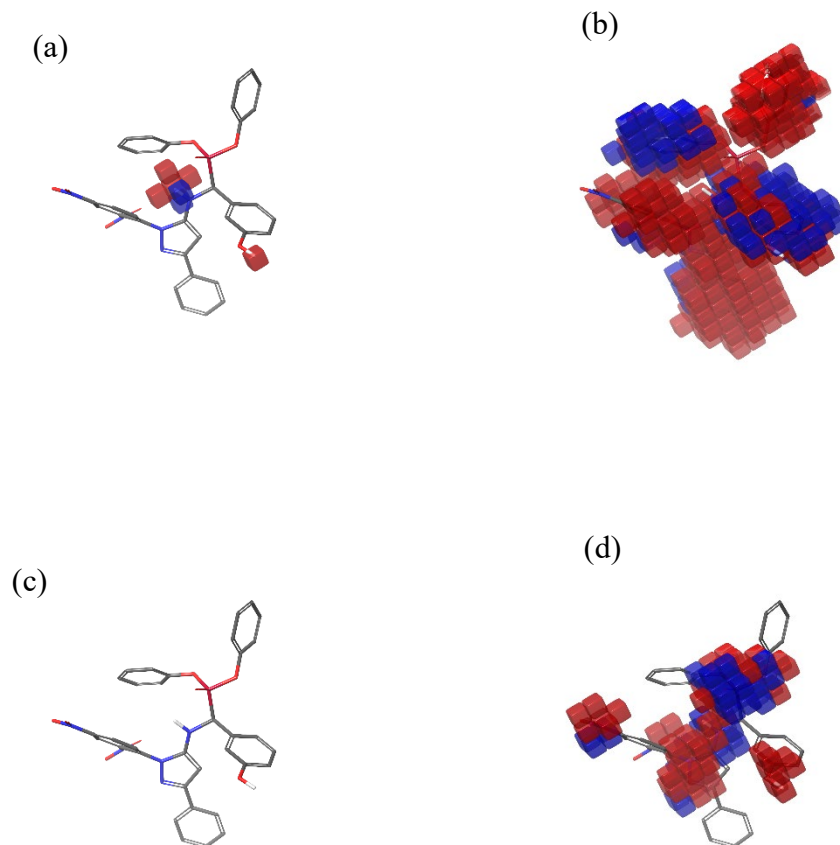

**Fig. S59.** QSAR models of compound 4c with VEGFR2 receptor inhibition for (a) hydrogen bond donor effect, (b) hydrophobic effect, (c) positive ionic effect, and (d) electron withdrawing effect.

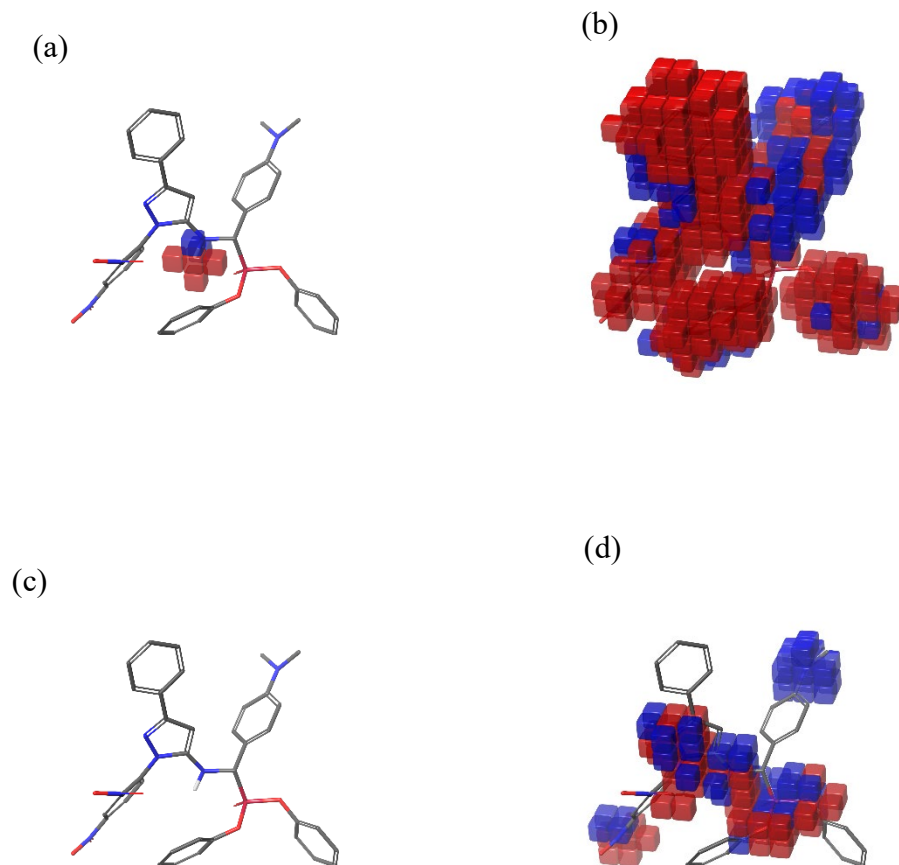

**Fig. S60.** QSAR models of compound 4d with VEGFR2 receptor inhibition for (a) hydrogen bond donor effect, (b) hydrophobic effect, (c) positive ionic effect, and (d) electron withdrawing effect.

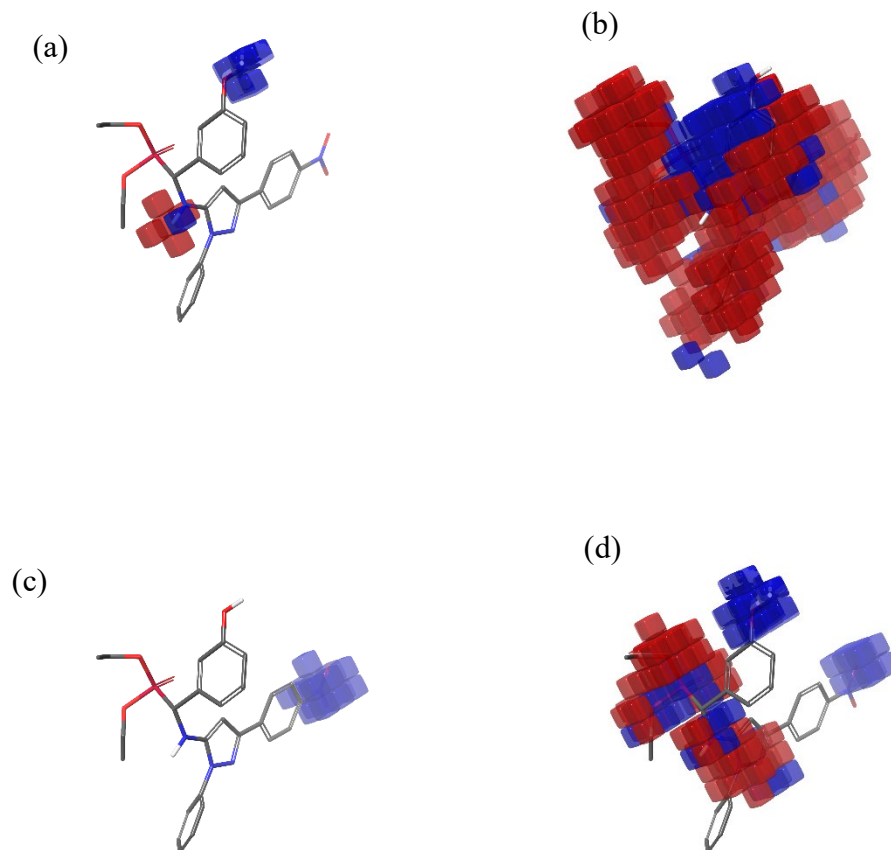

**Fig. S61.** QSAR models of compound 2b with FGFR1 receptor inhibition for (a) hydrogen bond donor effect, (b) hydrophobic effect, (c) positive ionic effect, and (d) electron withdrawing effect.

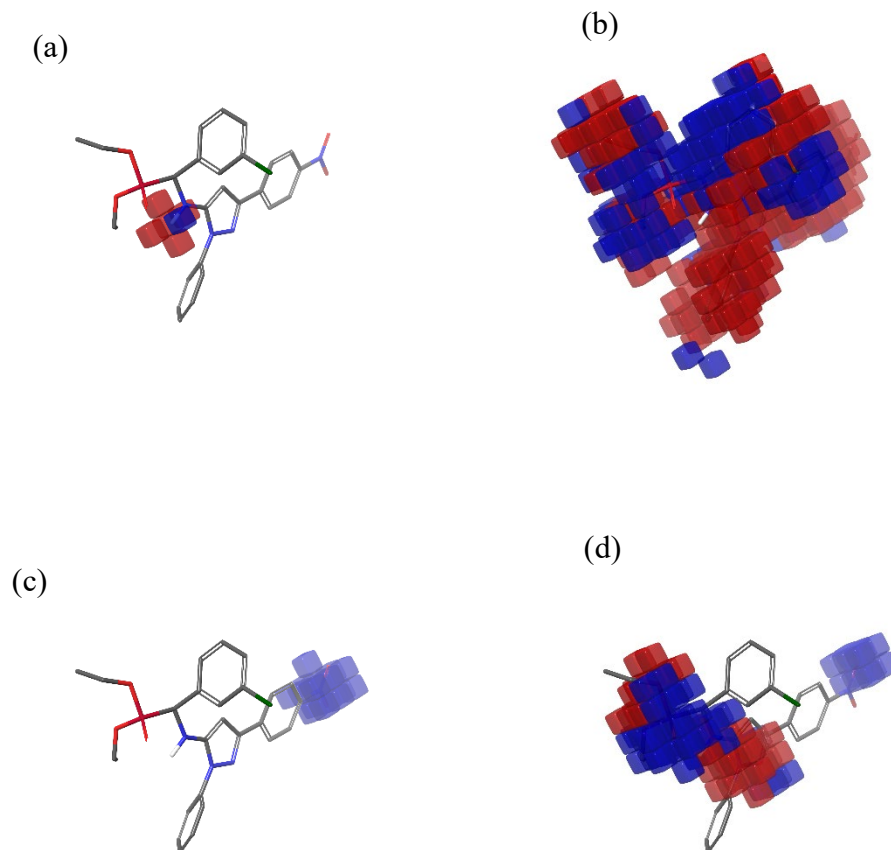

**Fig. S62.** QSAR models of compound 2c with FGFR1 receptor inhibition for (a) hydrogen bond donor effect, (b) hydrophobic effect, (c) positive ionic effect, and (d) electron withdrawing effect.

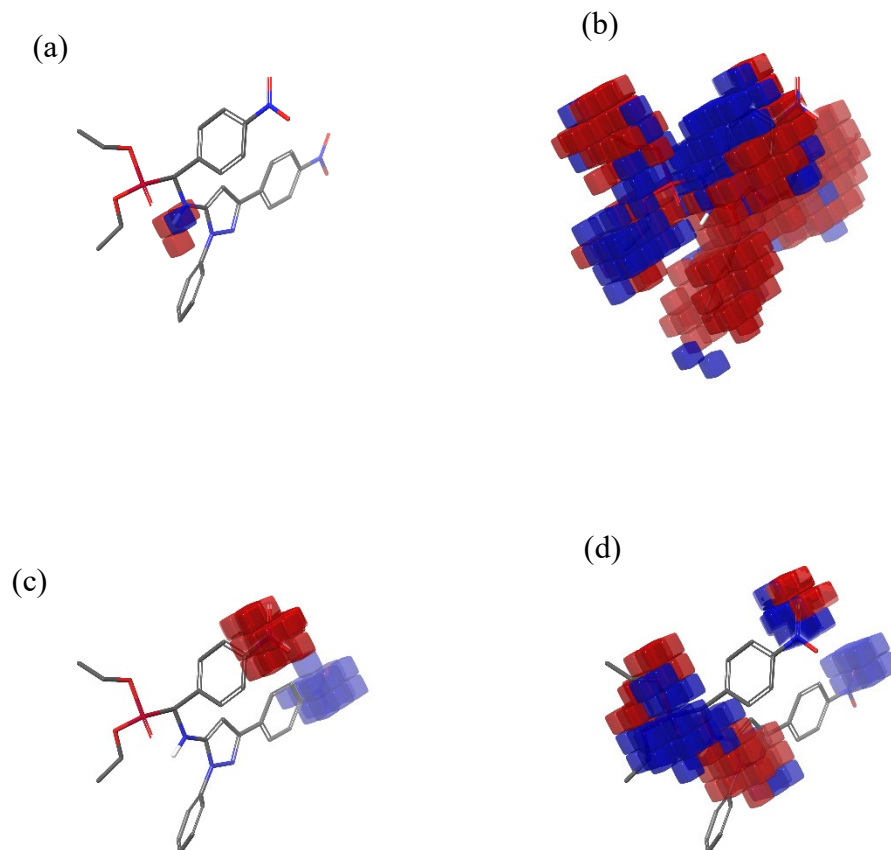

**Fig. S63.** QSAR models of compound 2d with FGFR1 receptor inhibition for (a) hydrogen bond donor effect, (b) hydrophobic effect, (c) positive ionic effect, and (d) electron withdrawing effect.



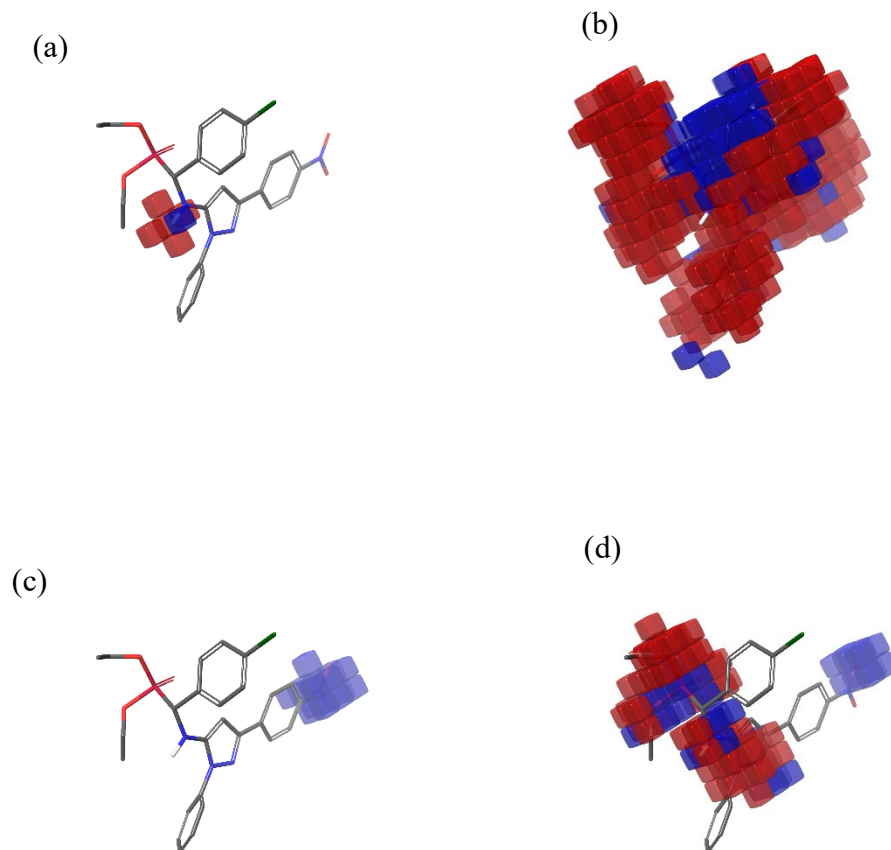

**Fig. S64.** QSAR models of compound 2e with FGFR1 receptor inhibition for (a) hydrogen bond donor effect, (b) hydrophobic effect, (c) positive ionic effect, and (d) electron withdrawing effect.

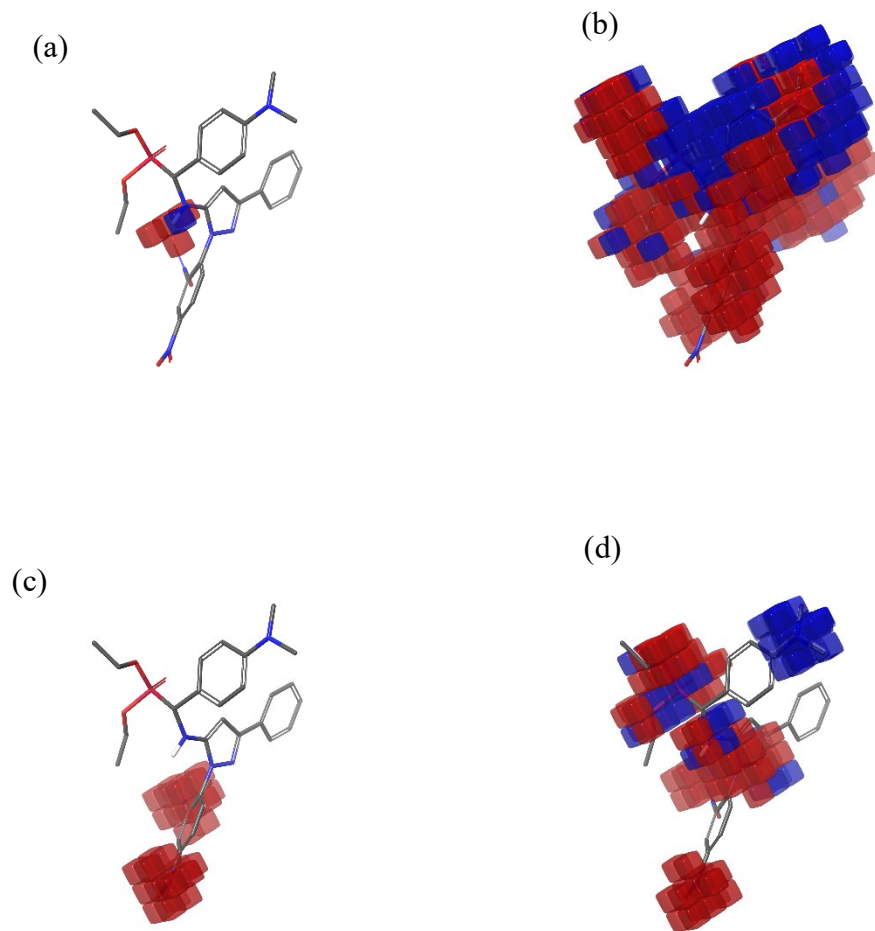

**Fig. S65.** QSAR models of compound 2f with FGFR1 receptor inhibition for (a) hydrogen bond donor effect, (b) hydrophobic effect, (c) positive ionic effect, and (d) electron withdrawing effect.

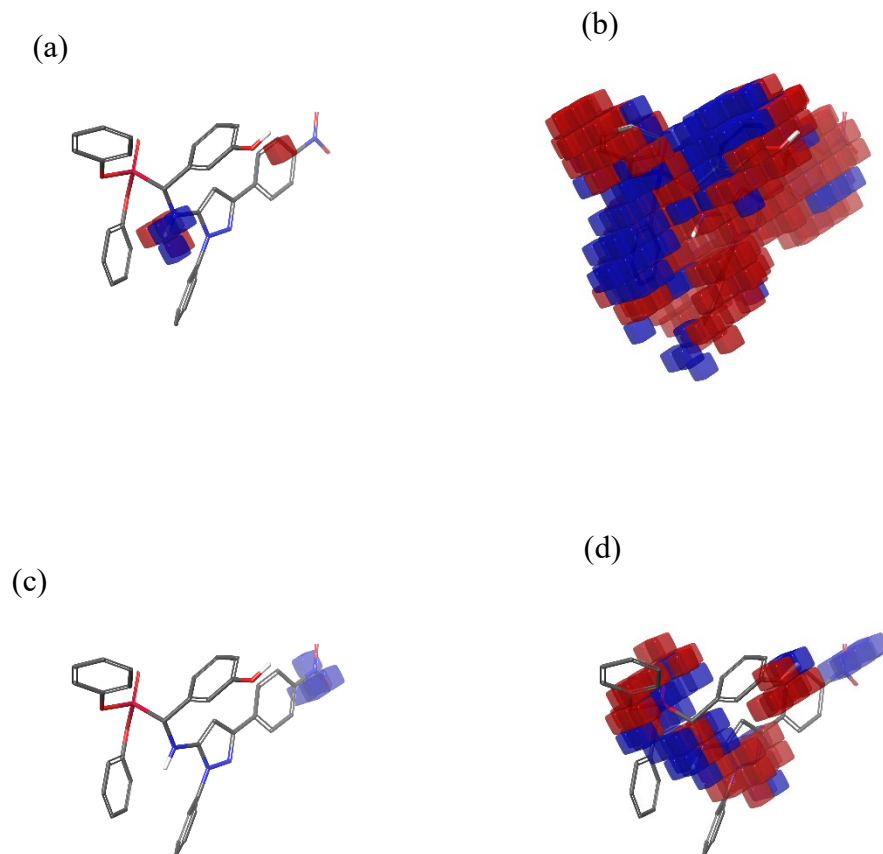

**Fig. S66.** QSAR models of compound 4a with FGFR1 receptor inhibition for (a) hydrogen bond donor effect, (b) hydrophobic effect, (c) positive ionic effect, and (d) electron withdrawing effect.

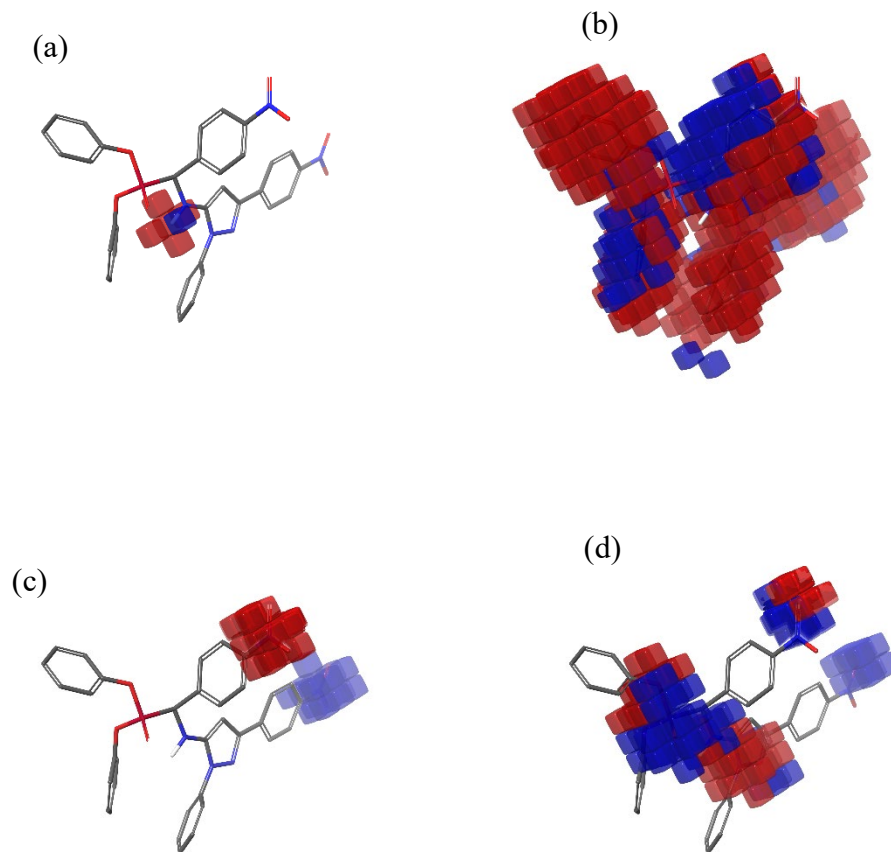

**Fig. S67.** QSAR models of compound 4b with FGFR1 receptor inhibition for (a) hydrogen bond donor effect, (b) hydrophobic effect, (c) positive ionic effect, and (d) electron withdrawing effect.

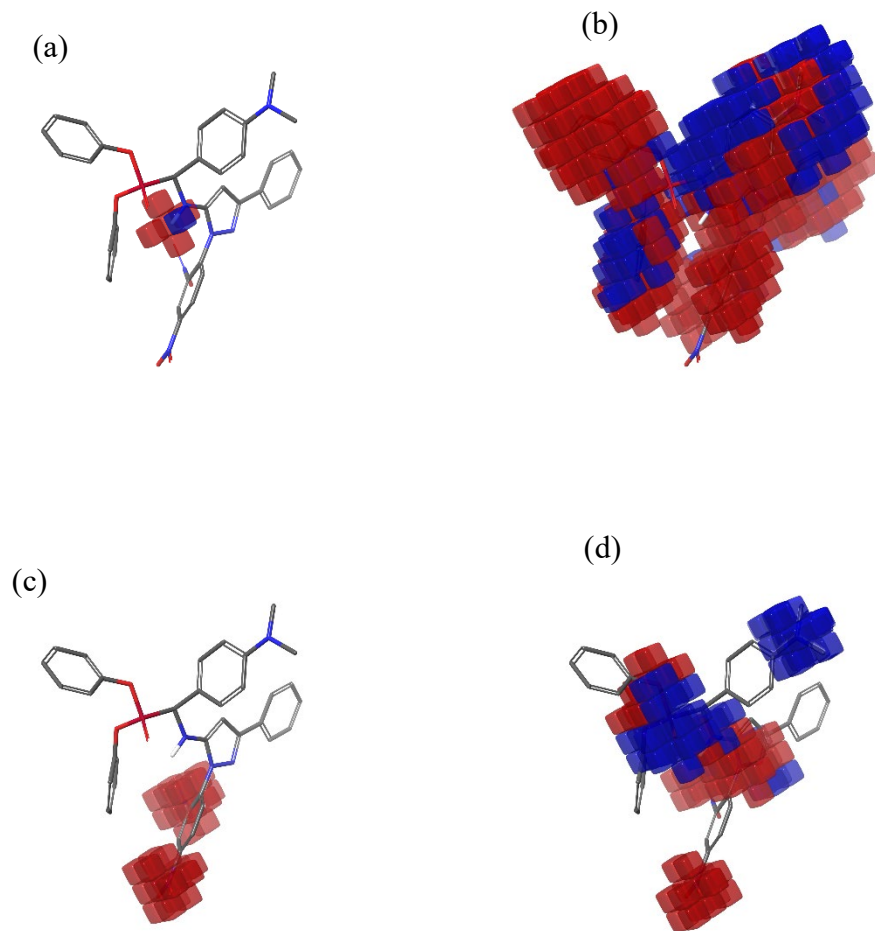

**Fig. S68.** QSAR models of compound 4d with FGFR1 receptor inhibition for (a) hydrogen bond donor effect, (b) hydrophobic effect, (c) positive ionic effect, and (d) electron withdrawing effect.

**Table S1:** Selected bond length (Å) of **2a**

| Bond        | Length(Å) | Bond        | Length(Å) | Bond        | Length(Å) |
|-------------|-----------|-------------|-----------|-------------|-----------|
| C(38)-H(60) | 1,084     | C(37)-H(64) | 1,086     | C(37)-C(38) | 1,393     |
| C(36)-H(63) | 1,086     | C(36)-C(37) | 1,397     | C(30)-H(62) | 1,086     |
| C(30)-C(36) | 1,390     | C(34)-H(61) | 1,087     | C(34)-C(30) | 1,396     |
| C(33)-C(34) | 1,398     | C(33)-C(38) | 1,396     | N(32)-C(33) | 1,424     |
| N(31)-N(32) | 1,362     | C(30)-H(60) | 1,080     | C(29)-H(09) | 1,083     |
| C(29)-C(30) | 1,389     | N(26)-O(28) | 1,234     | N(26)-O(27) | 1,232     |
| C(20)-C(29) | 1,394     | C(20)-N(26) | 1,466     | C(24)-H(08) | 1,082     |
| C(24)-C(20) | 1,390     | C(23)-H(07) | 1,083     | C(23)-C(24) | 1,386     |
| C(22)-C(23) | 1,408     | C(22)-C(30) | 1,406     | C(21)-N(31) | 1,336     |
| C(21)-C(22) | 1,467     | C(20)-H(06) | 1,077     | C(20)-C(21) | 1,420     |
| C(19)-C(20) | 1,384     | C(19)-N(32) | 1,373     | N(18)-H(00) | 1,014     |
| N(18)-C(19) | 1,386     | C(17)-H(04) | 1,087     | C(16)-H(03) | 1,086     |
| C(16)-C(17) | 1,390     | O(10)-H(02) | 0,966     | C(14)-C(16) | 1,398     |
| C(14)-O(10) | 1,363     | C(13)-H(01) | 1,086     | C(13)-C(14) | 1,398     |
| O(12)-H(00) | 0,960     | C(11)-C(13) | 1,391     | C(11)-O(12) | 1,366     |
| C(10)-C(11) | 1,409     | C(10)-C(17) | 1,394     | C(9)-H(49)  | 1,094     |
| C(9)-N(18)  | 1,464     | C(9)-C(10)  | 1,011     | C(8)-H(48)  | 1,090     |
| C(8)-H(47)  | 1,094     | C(8)-H(46)  | 1,093     | C(7)-H(40)  | 1,093     |
| C(7)-H(44)  | 1,093     | C(7)-C(8)   | 1,018     | O(6)-C(7)   | 1,408     |
| C(0)-H(43)  | 1,093     | C(0)-H(42)  | 1,093     | C(0)-H(41)  | 1,090     |
| C(4)-H(40)  | 1,090     | C(4)-H(39)  | 1,096     | C(4)-C(0)   | 1,010     |
| O(3)-C(4)   | 1,449     | P(2)-C(9)   | 1,890     | P(2)-O(6)   | 1,620     |
| P(2)-O(3)   | 1,614     | O(1)-P(2)   | 1,480     |             |           |

**Table S2:** Selected bond angle (°) of 2a.

| Angle             | (°) Degree | Angle             | (°) Degree | Angle             | (°) Degree |
|-------------------|------------|-------------------|------------|-------------------|------------|
| H(60)-C(38)-C(37) | 121,023    | H(60)-C(38)-C(33) | 119,180    | C(37)-C(38)-C(33) | 119,290    |
| H(64)-C(37)-C(38) | 119,668    | H(64)-C(37)-C(36) | 120,097    | C(38)-C(37)-C(36) | 120,233    |
| H(63)-C(36)-C(37) | 119,990    | H(63)-C(36)-C(30) | 120,100    | C(37)-C(36)-C(30) | 119,908    |
| H(62)-C(30)-C(36) | 120,130    | H(62)-C(30)-C(34) | 119,290    | C(36)-C(30)-C(34) | 120,062    |
| H(61)-C(34)-C(30) | 121,246    | H(61)-C(34)-C(33) | 119,827    | C(30)-C(34)-C(33) | 118,807    |
| C(34)-C(33)-C(38) | 121,171    | C(34)-C(33)-N(32) | 119,091    | C(38)-C(33)-N(32) | 119,233    |
| C(33)-N(32)-N(31) | 120,117    | C(33)-N(32)-C(19) | 127,600    | N(31)-N(32)-C(19) | 112,217    |
| N(32)-N(31)-C(21) | 104,868    | H(60)-C(30)-C(29) | 119,040    | H(60)-C(30)-C(22) | 119,899    |
| C(29)-C(30)-C(22) | 121,060    | H(09)-C(29)-C(30) | 121,689    | H(09)-C(29)-C(20) | 119,440    |
| C(30)-C(29)-C(20) | 118,866    | O(28)-N(26)-O(27) | 124,242    | O(28)-N(26)-C(20) | 117,802    |
| O(27)-N(26)-C(20) | 117,806    | C(29)-C(20)-N(26) | 119,213    | C(29)-C(20)-C(24) | 121,018    |
| N(26)-C(20)-C(24) | 119,268    | H(08)-C(24)-C(20) | 119,407    | H(08)-C(24)-C(23) | 121,050    |
| C(20)-C(24)-C(23) | 119,023    | H(07)-C(23)-C(24) | 120,229    | H(07)-C(23)-C(22) | 118,697    |
| C(24)-C(23)-C(22) | 120,974    | C(23)-C(22)-C(30) | 118,009    | C(23)-C(22)-C(21) | 120,221    |
| C(30)-C(22)-C(21) | 121,111    | N(31)-C(21)-C(22) | 120,149    | N(31)-C(21)-C(20) | 111,050    |
| C(22)-C(21)-C(20) | 128,200    | H(06)-C(20)-C(21) | 128,496    | H(06)-C(20)-C(19) | 126,044    |
| C(21)-C(20)-C(19) | 104,906    | C(20)-C(19)-N(32) | 106,268    | C(20)-C(19)-N(18) | 130,906    |
| N(32)-C(19)-N(18) | 122,609    | H(00)-N(18)-C(19) | 113,192    | H(00)-N(18)-C(9)  | 111,267    |
| C(19)-N(18)-C(9)  | 117,491    | H(04)-C(17)-C(16) | 118,964    | H(04)-C(17)-C(10) | 118,900    |
| C(16)-C(17)-C(10) | 122,136    | H(03)-C(16)-C(17) | 120,498    | H(03)-C(16)-C(14) | 120,230    |
| C(17)-C(16)-C(14) | 119,171    | H(02)-O(10)-C(14) | 109,413    | C(16)-C(14)-O(10) | 123,168    |
| C(16)-C(14)-C(13) | 120,142    | O(10)-C(14)-C(13) | 116,689    | H(01)-C(13)-C(14) | 119,193    |
| H(01)-C(13)-C(11) | 121,270    | C(14)-C(13)-C(11) | 119,031    | H(00)-O(12)-C(11) | 110,897    |
| C(13)-C(11)-O(12) | 122,161    | C(13)-C(11)-C(10) | 121,611    | O(12)-C(11)-C(10) | 116,227    |
| C(11)-C(10)-C(17) | 117,406    | C(11)-C(10)-C(9)  | 121,139    | C(17)-C(10)-C(9)  | 121,423    |
| H(49)-C(9)-N(18)  | 108,096    | H(49)-C(9)-C(10)  | 108,034    | H(49)-C(9)-P(2)   | 100,207    |
| N(18)-C(9)-C(10)  | 111,916    | N(18)-C(9)-P(2)   | 110,204    | C(10)-C(9)-P(2)   | 112,973    |
| H(48)-C(8)-H(47)  | 108,493    | H(48)-C(8)-H(46)  | 108,212    | H(48)-C(8)-C(7)   | 109,873    |
| H(47)-C(8)-H(46)  | 109,030    | H(47)-C(8)-C(7)   | 110,812    | H(46)-C(8)-C(7)   | 110,207    |
| H(40)-C(7)-H(44)  | 108,267    | H(40)-C(7)-C(8)   | 111,494    | H(40)-C(7)-O(6)   | 108,973    |
| H(44)-C(7)-C(8)   | 111,893    | H(44)-C(7)-O(6)   | 104,707    | C(8)-C(7)-O(6)    | 111,134    |
| C(7)-O(6)-P(2)    | 119,411    | H(43)-C(0)-H(42)  | 108,708    | H(43)-C(0)-H(41)  | 108,790    |
| H(43)-C(0)-C(4)   | 110,040    | H(42)-C(0)-H(41)  | 108,614    | H(42)-C(0)-C(4)   | 110,299    |
| H(41)-C(0)-C(4)   | 110,186    | H(40)-C(4)-H(39)  | 107,874    | H(40)-C(4)-C(0)   | 112,301    |
| H(40)-C(4)-O(3)   | 108,187    | H(39)-C(4)-C(0)   | 110,627    | H(39)-C(4)-O(3)   | 110,218    |
| C(0)-C(4)-O(3)    | 107,403    | C(4)-O(3)-P(2)    | 121,773    | C(9)-P(2)-O(6)    | 102,174    |
| C(9)-P(2)-O(3)    | 106,216    | C(9)-P(2)-O(1)    | 114,979    | O(6)-P(2)-O(3)    | 104,180    |
| O(6)-P(2)-O(1)    | 110,033    | O(3)-P(2)-O(1)    | 112,940    |                   |            |

**Table S3:** Selected bond length (Å) of **2b**.

| Bond        | Length(Å) | Bond        | Length(Å) | Bond        | Length(Å) |
|-------------|-----------|-------------|-----------|-------------|-----------|
| C(37)-H(74) | 1,084     | C(36)-H(73) | 1,086     | C(36)-C(37) | 1,392     |
| C(35)-H(72) | 1,087     | C(35)-C(36) | 1,398     | C(34)-H(71) | 1,086     |
| C(34)-C(35) | 1,396     | C(33)-H(70) | 1,080     | C(33)-C(34) | 1,396     |
| C(32)-C(33) | 1,398     | C(32)-C(37) | 1,396     | N(31)-C(32) | 1,423     |
| N(30)-N(31) | 1,370     | C(29)-H(59) | 1,080     | C(28)-H(58) | 1,083     |
| C(28)-C(29) | 1,390     | N(25)-O(27) | 1,232     | N(25)-O(26) | 1,233     |
| C(24)-C(28) | 1,394     | C(24)-N(25) | 1,476     | C(23)-H(57) | 1,083     |
| C(23)-C(24) | 1,390     | C(22)-H(56) | 1,083     | C(22)-C(23) | 1,386     |
| C(21)-C(22) | 1,408     | C(21)-C(29) | 1,407     | C(20)-N(30) | 1,336     |
| C(20)-C(21) | 1,477     | C(19)-H(55) | 1,079     | C(19)-C(20) | 1,421     |
| C(18)-C(19) | 1,384     | C(18)-N(31) | 1,370     | N(17)-H(54) | 1,012     |
| N(17)-C(18) | 1,380     | C(16)-H(53) | 1,086     | C(15)-H(52) | 1,086     |
| C(15)-C(16) | 1,394     | C(14)-H(51) | 1,088     | C(14)-C(15) | 1,394     |
| O(13)-H(50) | 0,966     | C(12)-C(14) | 1,399     | C(12)-O(13) | 1,370     |
| C(11)-H(49) | 1,080     | C(11)-C(12) | 1,397     | C(10)-C(11) | 1,398     |
| C(10)-C(11) | 1,399     | C(9)-H(48)  | 1,094     | C(9)-N(17)  | 1,470     |
| C(9)-C(10)  | 1,016     | C(8)-H(47)  | 1,093     | C(8)-H(46)  | 1,090     |
| C(8)-H(45)  | 1,093     | C(7)-H(44)  | 1,092     | C(7)-H(43)  | 1,096     |
| C(7)-C(8)   | 1,017     | O(6)-C(7)   | 1,400     | C(5)-H(42)  | 1,090     |
| C(5)-H(41)  | 1,094     | C(5)-H(40)  | 1,092     | C(4)-H(39)  | 1,094     |
| C(4)-H(38)  | 1,093     | C(4)-C(5)   | 1,019     | O(3)-C(4)   | 1,408     |
| P(2)-C(9)   | 1,872     | P(2)-O(6)   | 1,711     | P(2)-O(3)   | 1,717     |
| O(1)-P(2)   | 1,487     |             |           |             |           |



**Table S4:** Selected bond angle (°) of 2b.

| Angle             | (°) Degree | Angle             | (°) Degree | Angle             | (°) Degree |
|-------------------|------------|-------------------|------------|-------------------|------------|
| H(74)-C(37)-C(36) | 121,403    | H(74)-C(37)-C(32) | 119,103    | C(36)-C(37)-C(32) | 119,443    |
| H(73)-C(36)-C(37) | 119,683    | H(73)-C(36)-C(30) | 120,067    | C(37)-C(36)-C(30) | 120,240    |
| H(72)-C(30)-C(36) | 120,042    | H(72)-C(30)-C(34) | 120,142    | C(36)-C(30)-C(34) | 119,816    |
| H(71)-C(34)-C(30) | 120,331    | H(71)-C(34)-C(33) | 119,166    | C(30)-C(34)-C(33) | 120,496    |
| H(70)-C(33)-C(34) | 119,779    | H(70)-C(33)-C(32) | 121,109    | C(34)-C(33)-C(32) | 119,006    |
| C(33)-C(32)-C(37) | 120,914    | C(33)-C(32)-N(31) | 120,229    | C(37)-C(32)-N(31) | 118,807    |
| C(32)-N(31)-N(30) | 120,207    | C(32)-N(31)-C(18) | 127,016    | N(30)-N(31)-C(18) | 112,142    |
| N(31)-N(30)-C(20) | 104,907    | H(09)-C(29)-C(28) | 119,140    | H(09)-C(29)-C(21) | 119,870    |
| C(28)-C(29)-C(21) | 120,984    | H(08)-C(28)-C(29) | 121,683    | H(08)-C(28)-C(24) | 119,474    |
| C(29)-C(28)-C(24) | 118,802    | O(27)-N(20)-O(26) | 124,319    | O(27)-N(20)-C(24) | 117,898    |
| O(26)-N(20)-C(24) | 117,783    | C(28)-C(24)-N(20) | 119,123    | C(28)-C(24)-C(23) | 121,600    |
| N(20)-C(24)-C(23) | 119,270    | H(07)-C(23)-C(24) | 119,436    | H(07)-C(23)-C(22) | 121,088    |
| C(24)-C(23)-C(22) | 118,976    | H(06)-C(22)-C(23) | 120,377    | H(06)-C(22)-C(21) | 118,682    |
| C(23)-C(22)-C(21) | 120,941    | C(22)-C(21)-C(29) | 118,641    | C(22)-C(21)-C(20) | 120,186    |
| C(29)-C(21)-C(20) | 121,169    | N(30)-C(20)-C(21) | 119,987    | N(30)-C(20)-C(19) | 111,060    |
| C(21)-C(20)-C(19) | 128,443    | H(00)-C(19)-C(20) | 128,487    | H(00)-C(19)-C(18) | 126,087    |
| C(20)-C(19)-C(18) | 104,879    | C(19)-C(18)-N(31) | 106,423    | C(19)-C(18)-N(17) | 130,912    |
| N(31)-C(18)-N(17) | 122,004    | H(04)-N(17)-C(18) | 113,833    | H(04)-N(17)-C(9)  | 113,101    |
| C(18)-N(17)-C(9)  | 120,169    | H(03)-C(16)-C(10) | 120,160    | H(03)-C(16)-C(10) | 119,992    |
| C(10)-C(16)-C(10) | 119,847    | H(02)-C(10)-C(16) | 119,920    | H(02)-C(10)-C(14) | 119,438    |
| C(16)-C(10)-C(14) | 120,641    | H(01)-C(14)-C(10) | 120,030    | H(01)-C(14)-C(12) | 120,020    |
| C(10)-C(14)-C(12) | 119,440    | H(00)-O(13)-C(12) | 109,409    | C(14)-C(12)-O(13) | 122,787    |
| C(14)-C(12)-C(11) | 120,244    | O(13)-C(12)-C(11) | 116,966    | H(49)-C(11)-C(12) | 118,416    |
| H(49)-C(11)-C(10) | 121,040    | C(12)-C(11)-C(10) | 119,984    | C(11)-C(10)-C(16) | 119,831    |
| C(11)-C(10)-C(9)  | 119,916    | C(16)-C(10)-C(9)  | 120,244    | H(48)-C(9)-N(17)  | 108,207    |
| H(48)-C(9)-C(10)  | 109,078    | H(48)-C(9)-P(2)   | 107,673    | N(17)-C(9)-C(10)  | 110,711    |
| N(17)-C(9)-P(2)   | 111,292    | C(10)-C(9)-P(2)   | 109,742    | H(47)-C(8)-H(46)  | 108,610    |
| H(47)-C(8)-H(40)  | 108,726    | H(47)-C(8)-C(7)   | 110,209    | H(46)-C(8)-H(40)  | 108,700    |
| H(46)-C(8)-C(7)   | 110,183    | H(40)-C(8)-C(7)   | 110,316    | H(44)-C(7)-H(43)  | 108,071    |
| H(44)-C(7)-C(8)   | 112,116    | H(44)-C(7)-O(6)   | 100,397    | H(43)-C(7)-C(8)   | 110,899    |
| H(43)-C(7)-O(6)   | 110,394    | C(8)-C(7)-O(6)    | 109,819    | C(7)-O(6)-P(2)    | 123,132    |
| H(42)-C(0)-H(41)  | 108,829    | H(42)-C(0)-H(40)  | 108,619    | H(42)-C(0)-C(4)   | 109,642    |
| H(41)-C(0)-H(40)  | 108,022    | H(41)-C(0)-C(4)   | 110,682    | H(40)-C(0)-C(4)   | 110,498    |
| H(39)-C(4)-H(38)  | 108,727    | H(39)-C(4)-C(0)   | 111,244    | H(39)-C(4)-O(3)   | 109,278    |
| H(38)-C(4)-C(0)   | 111,748    | H(38)-C(4)-O(3)   | 104,474    | C(0)-C(4)-O(3)    | 111,122    |
| C(4)-O(3)-P(2)    | 120,633    | C(9)-P(2)-O(6)    | 106,000    | C(9)-P(2)-O(3)    | 102,430    |
| C(9)-P(2)-O(1)    | 113,678    | O(6)-P(2)-O(3)    | 100,439    | O(6)-P(2)-O(1)    | 111,419    |
| O(3)-P(2)-O(1)    | 116,840    |                   |            |                   |            |

**Table S5:** Selected bond length (Å) of **2c**.

| Bond        | Length(Å) | Bond         | Length(Å) | Bond        | Length(Å) |
|-------------|-----------|--------------|-----------|-------------|-----------|
| C(37)-H(73) | 1,080     | C(36)-H(72)  | 1,087     | C(36)-C(37) | 1,390     |
| C(35)-H(71) | 1,087     | C(35)-C(36)  | 1,393     | C(34)-H(70) | 1,087     |
| C(34)-C(35) | 1,397     | C(33)-H(69)  | 1,083     | C(33)-C(34) | 1,391     |
| C(32)-C(33) | 1,398     | C(32)-C(37)  | 1,399     | N(31)-C(32) | 1,420     |
| N(30)-N(31) | 1,362     | C(29)-H(68)  | 1,080     | C(28)-H(67) | 1,083     |
| C(28)-C(29) | 1,389     | N(20)-O(27)  | 1,233     | N(20)-O(26) | 1,232     |
| C(24)-C(28) | 1,393     | C(24)-N(20)  | 1,477     | C(23)-H(66) | 1,083     |
| C(23)-C(24) | 1,390     | C(22)-H(65)  | 1,084     | C(22)-C(23) | 1,387     |
| C(21)-C(22) | 1,407     | C(21)-C(29)  | 1,400     | C(20)-N(30) | 1,337     |
| C(20)-C(21) | 1,478     | C(19)-H(64)  | 1,077     | C(19)-C(20) | 1,419     |
| C(18)-C(19) | 1,382     | C(18)-N(31)  | 1,377     | N(17)-H(63) | 1,010     |
| N(17)-C(18) | 1,390     | C(16)-H(62)  | 1,087     | C(15)-H(61) | 1,087     |
| C(15)-C(16) | 1,390     | C(14)-H(60)  | 1,084     | C(14)-C(15) | 1,393     |
| C(12)-C(14) | 1,394     | C(12)-Cl(13) | 1,709     | C(11)-H(59) | 1,080     |
| C(11)-C(12) | 1,391     | C(10)-C(11)  | 1,403     | C(10)-C(16) | 1,397     |
| C(9)-H(58)  | 1,092     | C(9)-N(17)   | 1,478     | C(9)-C(10)  | 1,017     |
| C(8)-H(57)  | 1,093     | C(8)-H(56)   | 1,094     | C(8)-H(55)  | 1,097     |
| C(7)-H(54)  | 1,094     | C(7)-H(53)   | 1,093     | C(7)-C(8)   | 1,018     |
| O(6)-C(7)   | 1,407     | C(5)-H(52)   | 1,093     | C(5)-H(51)  | 1,097     |
| C(5)-H(50)  | 1,093     | C(4)-H(39)   | 1,093     | C(4)-H(38)  | 1,090     |
| C(4)-C(5)   | 1,019     | O(3)-C(4)    | 1,409     | P(2)-C(9)   | 1,807     |
| P(2)-O(6)   | 1,717     | P(2)-O(3)    | 1,700     | O(1)-P(2)   | 1,491     |

**Table S6:** Selected bond angle (°) of 2c.

| Angle              | (°) Degree | Angle              | (°) Degree | Angle             | Degree (°) |
|--------------------|------------|--------------------|------------|-------------------|------------|
| H(63)-C(37)-C(36)  | 120,097    | H(63)-C(37)-C(32)  | 119,944    | C(36)-C(37)-C(32) | 119,447    |
| H(62)-C(36)-C(37)  | 119,492    | H(62)-C(36)-C(30)  | 120,203    | C(37)-C(36)-C(30) | 120,300    |
| H(61)-C(30)-C(36)  | 120,114    | H(61)-C(30)-C(34)  | 120,047    | C(36)-C(30)-C(34) | 119,838    |
| H(60)-C(34)-C(30)  | 120,006    | H(60)-C(34)-C(33)  | 119,492    | C(30)-C(34)-C(33) | 120,446    |
| H(09)-C(33)-C(34)  | 121,633    | H(09)-C(33)-C(32)  | 118,974    | C(34)-C(33)-C(32) | 119,393    |
| C(33)-C(32)-C(37)  | 120,049    | C(33)-C(32)-N(31)  | 119,006    | C(37)-C(32)-N(31) | 120,390    |
| C(32)-N(31)-N(30)  | 120,000    | C(32)-N(31)-C(18)  | 127,020    | N(30)-N(31)-C(18) | 112,040    |
| N(31)-N(30)-C(20)  | 104,898    | H(08)-C(29)-C(28)  | 119,073    | H(08)-C(29)-C(21) | 119,948    |
| C(28)-C(29)-C(21)  | 120,982    | H(07)-C(28)-C(29)  | 121,638    | H(07)-C(28)-C(24) | 119,428    |
| C(29)-C(28)-C(24)  | 118,932    | O(27)-N(20)-O(26)  | 124,236    | O(27)-N(20)-C(24) | 117,877    |
| O(26)-N(20)-C(24)  | 117,887    | C(28)-C(24)-N(20)  | 119,218    | C(28)-C(24)-C(23) | 121,013    |
| N(20)-C(24)-C(23)  | 119,267    | H(06)-C(23)-C(24)  | 119,443    | H(06)-C(23)-C(22) | 121,096    |
| C(24)-C(23)-C(22)  | 118,960    | H(00)-C(22)-C(23)  | 120,278    | H(00)-C(22)-C(21) | 118,736    |
| C(23)-C(22)-C(21)  | 120,980    | C(22)-C(21)-C(29)  | 118,627    | C(22)-C(21)-C(20) | 120,160    |
| C(29)-C(21)-C(20)  | 121,193    | N(30)-C(20)-C(21)  | 119,880    | N(30)-C(20)-C(19) | 111,628    |
| C(21)-C(20)-C(19)  | 128,486    | H(04)-C(19)-C(20)  | 128,343    | H(04)-C(19)-C(18) | 126,610    |
| C(20)-C(19)-C(18)  | 104,996    | C(19)-C(18)-N(31)  | 107,419    | C(19)-C(18)-N(17) | 131,809    |
| N(31)-C(18)-N(17)  | 121,720    | H(03)-N(17)-C(18)  | 111,684    | H(03)-N(17)-C(9)  | 110,742    |
| C(18)-N(17)-C(9)   | 119,233    | H(02)-C(17)-C(10)  | 119,969    | H(02)-C(17)-C(10) | 119,700    |
| C(10)-C(17)-C(10)  | 120,326    | H(01)-C(10)-C(17)  | 119,896    | H(01)-C(10)-C(14) | 119,473    |
| C(17)-C(10)-C(14)  | 120,631    | H(00)-C(14)-C(10)  | 121,222    | H(00)-C(14)-C(12) | 120,124    |
| C(10)-C(14)-C(12)  | 118,603    | C(14)-C(12)-Cl(13) | 119,366    | C(14)-C(12)-C(11) | 121,038    |
| Cl(13)-C(12)-C(11) | 119,090    | H(49)-C(11)-C(12)  | 119,601    | H(49)-C(11)-C(10) | 120,906    |
| C(12)-C(11)-C(10)  | 119,429    | C(11)-C(10)-C(17)  | 119,420    | C(11)-C(10)-C(9)  | 119,803    |

|                  |         |                  |         |                  |         |
|------------------|---------|------------------|---------|------------------|---------|
| C(17)-C(10)-C(9) | 120,741 | H(48)-C(9)-N(17) | 109,104 | H(48)-C(9)-C(10) | 109,774 |
| H(48)-C(9)-P(2)  | 108,489 | N(17)-C(9)-C(10) | 110,724 | N(17)-C(9)-P(2)  | 110,243 |
| C(10)-C(9)-P(2)  | 108,783 | H(47)-C(8)-H(46) | 109,170 | H(47)-C(8)-H(40) | 108,083 |
| H(47)-C(8)-C(7)  | 109,937 | H(46)-C(8)-H(40) | 108,040 | H(46)-C(8)-C(7)  | 110,047 |
| H(40)-C(8)-C(7)  | 110,024 | H(44)-C(7)-H(43) | 108,341 | H(44)-C(7)-C(8)  | 111,190 |
| H(44)-C(7)-O(6)  | 109,803 | H(43)-C(7)-C(8)  | 111,987 | H(43)-C(7)-O(6)  | 104,741 |
| C(8)-C(7)-O(6)   | 110,703 | C(7)-O(6)-P(2)   | 120,034 | H(42)-C(0)-H(41) | 108,793 |
| H(42)-C(0)-H(40) | 108,971 | H(42)-C(0)-C(4)  | 110,179 | H(41)-C(0)-H(40) | 108,080 |
| H(41)-C(0)-C(4)  | 109,798 | H(40)-C(0)-C(4)  | 110,777 | H(39)-C(4)-H(38) | 108,203 |
| H(39)-C(4)-C(0)  | 111,803 | H(39)-C(4)-O(3)  | 104,031 | H(38)-C(4)-C(0)  | 111,474 |
| H(38)-C(4)-O(3)  | 109,083 | C(0)-C(4)-O(3)   | 110,937 | C(4)-O(3)-P(2)   | 119,990 |
| C(9)-P(2)-O(6)   | 100,778 | C(9)-P(2)-O(3)   | 102,021 | C(9)-P(2)-O(1)   | 112,127 |
| O(6)-P(2)-O(3)   | 102,931 | O(6)-P(2)-O(1)   | 110,470 | O(3)-P(2)-O(1)   | 117,079 |

**Table S7:** Selected bond length (Å) of **2d**.

| Bond        | Length(Å) | Bond        | Length(Å) | Bond        | Length(Å) |
|-------------|-----------|-------------|-----------|-------------|-----------|
| C(39)-H(60) | 1,084     | C(38)-H(64) | 1,087     | C(38)-C(39) | 1,392     |
| C(37)-H(63) | 1,087     | C(37)-C(38) | 1,397     | C(36)-H(62) | 1,087     |
| C(36)-C(37) | 1,390     | C(30)-H(61) | 1,087     | C(30)-C(36) | 1,397     |
| C(34)-C(30) | 1,399     | C(34)-C(39) | 1,397     | N(33)-C(34) | 1,420     |
| N(32)-N(33) | 1,372     | C(31)-H(60) | 1,084     | C(30)-H(09) | 1,082     |
| C(30)-C(31) | 1,389     | N(27)-O(29) | 1,232     | N(27)-O(28) | 1,233     |
| C(26)-C(30) | 1,393     | C(26)-N(27) | 1,477     | C(20)-H(08) | 1,083     |
| C(20)-C(26) | 1,390     | C(24)-H(07) | 1,084     | C(24)-C(20) | 1,387     |
| C(23)-C(24) | 1,408     | C(23)-C(31) | 1,400     | C(22)-N(32) | 1,337     |
| C(22)-C(23) | 1,477     | C(21)-H(06) | 1,077     | C(21)-C(22) | 1,418     |
| C(20)-C(21) | 1,382     | C(20)-N(32) | 1,370     | N(19)-H(00) | 1,013     |
| N(19)-C(20) | 1,388     | C(18)-H(04) | 1,087     | C(17)-H(03) | 1,083     |
| C(17)-C(18) | 1,391     | N(14)-O(16) | 1,229     | N(14)-O(10) | 1,231     |
| C(13)-C(17) | 1,393     | C(13)-N(14) | 1,474     | C(12)-H(02) | 1,083     |
| C(12)-C(13) | 1,392     | C(11)-H(01) | 1,080     | C(11)-C(12) | 1,392     |
| C(10)-C(11) | 1,399     | C(10)-C(18) | 1,404     | C(9)-H(00)  | 1,093     |
| C(9)-N(19)  | 1,477     | C(9)-C(10)  | 1,017     | C(8)-H(49)  | 1,090     |
| C(8)-H(48)  | 1,094     | C(8)-H(47)  | 1,093     | C(7)-H(46)  | 1,093     |
| C(7)-H(40)  | 1,091     | C(7)-C(8)   | 1,017     | O(6)-C(7)   | 1,471     |
| C(0)-H(44)  | 1,090     | C(0)-H(43)  | 1,093     | C(0)-H(42)  | 1,092     |
| C(4)-H(41)  | 1,093     | C(4)-H(40)  | 1,094     | C(4)-C(0)   | 1,017     |
| O(3)-C(4)   | 1,408     | P(2)-C(9)   | 1,870     | P(2)-O(6)   | 1,704     |
| P(2)-O(3)   | 1,708     | O(1)-P(2)   | 1,494     |             |           |

**Table S8:** Selected bond angle (°) of 2d.

| Angle             | (°) Degree | Angle             | (°) Degree | Angle             | (°) Degree |
|-------------------|------------|-------------------|------------|-------------------|------------|
| H(70)-C(39)-C(38) | 121,000    | H(70)-C(39)-C(34) | 119,141    | C(38)-C(39)-C(34) | 119,302    |
| H(74)-C(38)-C(39) | 119,717    | H(74)-C(38)-C(37) | 120,104    | C(39)-C(38)-C(37) | 120,278    |
| H(73)-C(37)-C(38) | 119,989    | H(73)-C(37)-C(36) | 120,089    | C(38)-C(37)-C(36) | 119,920    |
| H(72)-C(36)-C(37) | 120,241    | H(72)-C(36)-C(30) | 119,239    | C(37)-C(36)-C(30) | 120,009    |
| H(71)-C(30)-C(36) | 120,420    | H(71)-C(30)-C(34) | 120,734    | C(36)-C(30)-C(34) | 118,933    |
| C(30)-C(34)-C(39) | 121,041    | C(30)-C(34)-N(33) | 120,030    | C(39)-C(34)-N(33) | 118,918    |
| C(34)-N(33)-N(32) | 119,844    | C(34)-N(33)-C(20) | 128,120    | N(32)-N(33)-C(20) | 111,996    |
| N(33)-N(32)-C(22) | 104,910    | H(70)-C(31)-C(30) | 119,084    | H(70)-C(31)-C(23) | 119,911    |
| C(30)-C(31)-C(23) | 120,999    | H(09)-C(30)-C(31) | 121,797    | H(09)-C(30)-C(26) | 119,491    |
| C(31)-C(30)-C(26) | 118,812    | O(29)-N(27)-O(28) | 124,382    | O(29)-N(27)-C(26) | 117,808    |
| O(28)-N(27)-C(26) | 117,709    | C(30)-C(26)-N(27) | 119,097    | C(30)-C(26)-C(20) | 121,707    |
| N(27)-C(26)-C(20) | 119,248    | H(08)-C(20)-C(26) | 119,441    | H(08)-C(20)-C(24) | 121,723    |
| C(26)-C(20)-C(24) | 118,930    | H(07)-C(24)-C(20) | 120,302    | H(07)-C(24)-C(23) | 118,802    |
| C(20)-C(24)-C(23) | 120,840    | C(24)-C(23)-C(31) | 118,702    | C(24)-C(23)-C(22) | 120,237    |
| C(31)-C(23)-C(22) | 121,001    | N(32)-C(22)-C(23) | 119,972    | N(32)-C(22)-C(21) | 111,707    |
| C(23)-C(22)-C(21) | 128,400    | H(06)-C(21)-C(22) | 128,494    | H(06)-C(21)-C(20) | 127,071    |
| C(22)-C(21)-C(20) | 104,944    | C(21)-C(20)-N(33) | 107,011    | C(21)-C(20)-N(19) | 131,070    |
| N(33)-C(20)-N(19) | 122,300    | H(00)-N(19)-C(20) | 113,270    | H(00)-N(19)-C(9)  | 112,733    |
| C(20)-N(19)-C(9)  | 119,418    | H(04)-C(18)-C(17) | 119,722    | H(04)-C(18)-C(10) | 119,772    |
| C(17)-C(18)-C(10) | 120,070    | H(03)-C(17)-C(18) | 121,777    | H(03)-C(17)-C(13) | 119,079    |
| C(18)-C(17)-C(13) | 118,702    | O(16)-N(14)-O(10) | 124,872    | O(16)-N(14)-C(13) | 117,790    |
| O(10)-N(14)-C(13) | 117,438    | C(17)-C(13)-N(14) | 119,009    | C(17)-C(13)-C(12) | 121,979    |
| N(14)-C(13)-C(12) | 118,972    | H(02)-C(12)-C(13) | 119,080    | H(02)-C(12)-C(11) | 121,810    |
| C(13)-C(12)-C(11) | 118,710    | H(01)-C(11)-C(12) | 119,424    | H(01)-C(11)-C(10) | 119,740    |
| C(12)-C(11)-C(10) | 120,837    | C(11)-C(10)-C(18) | 119,204    | C(11)-C(10)-C(9)  | 120,394    |
| C(18)-C(10)-C(9)  | 120,300    | H(00)-C(9)-N(19)  | 108,079    | H(00)-C(9)-C(10)  | 109,411    |
| H(00)-C(9)-P(2)   | 107,182    | N(19)-C(9)-C(10)  | 109,033    | N(19)-C(9)-P(2)   | 111,337    |
| C(10)-C(9)-P(2)   | 110,743    | H(49)-C(8)-H(48)  | 108,073    | H(49)-C(8)-H(47)  | 108,439    |
| H(49)-C(8)-C(7)   | 109,779    | H(48)-C(8)-H(47)  | 109,132    | H(48)-C(8)-C(7)   | 110,742    |
| H(47)-C(8)-C(7)   | 110,330    | H(47)-C(7)-H(40)  | 107,970    | H(47)-C(7)-C(8)   | 111,032    |
| H(46)-C(7)-O(6)   | 109,477    | H(40)-C(7)-C(8)   | 112,348    | H(40)-C(7)-O(6)   | 104,199    |
| C(8)-C(7)-O(6)    | 111,019    | C(7)-O(6)-P(2)    | 121,130    | H(44)-C(0)-H(43)  | 108,470    |
| H(44)-C(0)-H(42)  | 108,040    | H(44)-C(0)-C(4)   | 109,789    | H(43)-C(0)-H(42)  | 108,717    |
| H(43)-C(0)-C(4)   | 110,797    | H(42)-C(0)-C(4)   | 110,772    | H(41)-C(4)-H(40)  | 108,170    |
| H(41)-C(4)-C(0)   | 112,030    | H(41)-C(4)-O(3)   | 109,372    | H(40)-C(4)-C(0)   | 111,727    |
| H(40)-C(4)-O(3)   | 107,707    | C(0)-C(4)-O(3)    | 108,781    | C(4)-O(3)-P(2)    | 121,338    |
| C(9)-P(2)-O(6)    | 103,971    | C(9)-P(2)-O(3)    | 104,380    | C(9)-P(2)-O(1)    | 112,000    |
| O(6)-P(2)-O(3)    | 102,377    | O(6)-P(2)-O(1)    | 117,209    | O(3)-P(2)-O(1)    | 117,300    |
| H(03)-C(9)-C(4)   | 119,043    | C(8)-C(9)-C(4)    | 119,242    | H(02)-C(8)-C(9)   | 118,908    |
| H(02)-C(8)-C(7)   | 121,073    | C(9)-C(8)-C(7)    | 120,008    | H(01)-C(7)-C(8)   | 120,100    |
| H(01)-C(7)-C(6)   | 120,077    | C(8)-C(7)-C(6)    | 119,817    | H(00)-C(6)-C(7)   | 120,040    |
| H(00)-C(6)-C(0)   | 119,008    | C(7)-C(6)-C(0)    | 120,902    | H(49)-C(0)-C(6)   | 121,708    |
| H(49)-C(0)-C(4)   | 120,242    | C(6)-C(0)-C(4)    | 118,043    | C(0)-C(4)-C(9)    | 121,971    |
| C(0)-C(4)-O(3)    | 108,781    | C(9)-C(4)-O(3)    | 110,407    | C(4)-O(3)-P(2)    | 121,338    |
| C(17)-P(2)-O(10)  | 101,748    | C(17)-P(2)-O(3)   | 107,721    | C(17)-P(2)-O(1)   | 112,093    |
| O(10)-P(2)-O(3)   | 97,040     | O(10)-P(2)-O(1)   | 117,870    | O(3)-P(2)-O(1)    | 117,300    |

|                  |         |                 |         |                 |         |
|------------------|---------|-----------------|---------|-----------------|---------|
| H(04)-C(8)-C(7)  | 120,870 | C(9)-C(8)-C(7)  | 120,008 | H(03)-C(7)-C(8) | 120,144 |
| H(03)-C(7)-C(6)  | 120,100 | C(8)-C(7)-C(6)  | 119,816 | H(02)-C(6)-C(7) | 120,070 |
| H(02)-C(6)-C(5)  | 118,987 | C(7)-C(6)-C(5)  | 120,902 | H(01)-C(5)-C(6) | 121,478 |
| H(01)-C(5)-C(4)  | 120,443 | C(6)-C(5)-C(4)  | 118,043 | C(5)-C(4)-C(9)  | 121,971 |
| C(5)-C(4)-O(3)   | 108,781 | C(9)-C(4)-O(3)  | 110,407 | C(4)-O(3)-P(2)  | 121,338 |
| C(17)-P(2)-O(10) | 101,748 | C(17)-P(2)-O(3) | 107,721 | C(17)-P(2)-O(1) | 112,093 |
| O(10)-P(2)-O(3)  | 97,040  | O(10)-P(2)-O(1) | 117,870 | O(3)-P(2)-O(1)  | 117,300 |

**Table S9:** Selected bond length (Å) of **2e**

| Bond        | Length(Å) | Bond        | Length(Å) | Bond         | Length(Å) |
|-------------|-----------|-------------|-----------|--------------|-----------|
| C(37)-H(63) | 1,087     | C(36)-H(62) | 1,087     | C(36)-C(37)  | 1,390     |
| C(35)-H(61) | 1,087     | C(35)-C(36) | 1,394     | C(34)-H(60)  | 1,087     |
| C(34)-C(35) | 1,397     | C(33)-H(59) | 1,084     | C(33)-C(34)  | 1,392     |
| C(32)-C(33) | 1,397     | C(32)-C(37) | 1,398     | N(31)-C(32)  | 1,420     |
| N(30)-N(31) | 1,304     | C(29)-H(58) | 1,080     | C(28)-H(57)  | 1,083     |
| C(28)-C(29) | 1,389     | N(25)-O(27) | 1,233     | N(25)-O(26)  | 1,233     |
| C(24)-C(28) | 1,393     | C(24)-N(25) | 1,477     | C(23)-H(56)  | 1,083     |
| C(23)-C(24) | 1,390     | C(22)-H(55) | 1,084     | C(22)-C(23)  | 1,387     |
| C(21)-C(22) | 1,408     | C(21)-C(29) | 1,407     | C(20)-N(30)  | 1,338     |
| C(20)-C(21) | 1,478     | C(19)-H(54) | 1,070     | C(19)-C(20)  | 1,420     |
| C(18)-C(19) | 1,380     | C(18)-N(31) | 1,383     | N(17)-H(53)  | 1,013     |
| N(17)-C(18) | 1,399     | C(16)-H(52) | 1,080     | C(15)-H(51)  | 1,084     |
| C(15)-C(16) | 1,393     | C(13)-C(15) | 1,394     | C(13)-Cl(14) | 1,709     |
| C(12)-H(50) | 1,084     | C(12)-C(13) | 1,393     | C(11)-H(49)  | 1,080     |
| C(11)-C(12) | 1,393     | C(10)-C(11) | 1,402     | C(10)-C(16)  | 1,399     |
| C(9)-H(48)  | 1,097     | C(9)-N(17)  | 1,477     | C(9)-C(10)   | 1,018     |
| C(8)-H(47)  | 1,093     | C(8)-H(46)  | 1,090     | C(8)-H(45)   | 1,090     |
| C(7)-H(44)  | 1,094     | C(7)-H(43)  | 1,093     | C(7)-C(8)    | 1,018     |
| O(6)-C(7)   | 1,400     | C(5)-H(42)  | 1,092     | C(5)-H(41)   | 1,090     |
| C(5)-H(40)  | 1,094     | C(4)-H(39)  | 1,093     | C(4)-H(38)   | 1,090     |
| C(4)-C(5)   | 1,020     | O(3)-C(4)   | 1,404     | P(2)-C(9)    | 1,802     |
| P(2)-O(6)   | 1,720     | P(2)-O(3)   | 1,710     | O(1)-P(2)    | 1,488     |

**Table S10:** Selected bond angle (°) of 2e

| Angle              | (°) Degree | Angle              | (°) Degree | Angle             | (°) Degree |
|--------------------|------------|--------------------|------------|-------------------|------------|
| H(73)-C(37)-C(36)  | 120,743    | H(73)-C(37)-C(32)  | 119,799    | C(36)-C(37)-C(32) | 119,029    |
| H(72)-C(36)-C(37)  | 119,078    | H(72)-C(36)-C(30)  | 120,208    | C(37)-C(36)-C(30) | 120,102    |
| H(71)-C(30)-C(36)  | 120,076    | H(71)-C(30)-C(34)  | 120,032    | C(36)-C(30)-C(34) | 119,901    |
| H(70)-C(34)-C(30)  | 120,040    | H(70)-C(34)-C(33)  | 119,001    | C(30)-C(34)-C(33) | 120,398    |
| H(09)-C(33)-C(34)  | 121,729    | H(09)-C(33)-C(32)  | 119,003    | C(34)-C(33)-C(32) | 119,378    |
| C(33)-C(32)-C(37)  | 120,707    | C(33)-C(32)-N(31)  | 119,198    | C(37)-C(32)-N(31) | 120,188    |
| C(32)-N(31)-N(30)  | 120,133    | C(32)-N(31)-C(18)  | 127,718    | N(30)-N(31)-C(18) | 112,237    |
| N(31)-N(30)-C(20)  | 100,021    | H(08)-C(29)-C(28)  | 119,128    | H(08)-C(29)-C(21) | 119,870    |
| C(28)-C(29)-C(21)  | 121,011    | H(07)-C(28)-C(29)  | 121,749    | H(07)-C(28)-C(24) | 119,478    |
| C(29)-C(28)-C(24)  | 118,872    | O(27)-N(20)-O(26)  | 124,273    | O(27)-N(20)-C(24) | 117,887    |
| O(26)-N(20)-C(24)  | 117,840    | C(28)-C(24)-N(20)  | 119,270    | C(28)-C(24)-C(23) | 121,080    |
| N(20)-C(24)-C(23)  | 119,140    | H(06)-C(23)-C(24)  | 119,473    | H(06)-C(23)-C(22) | 121,000    |
| C(24)-C(23)-C(22)  | 118,970    | H(00)-C(22)-C(23)  | 120,280    | H(00)-C(22)-C(21) | 118,772    |
| C(23)-C(22)-C(21)  | 120,907    | C(22)-C(21)-C(29)  | 118,097    | C(22)-C(21)-C(20) | 120,070    |
| C(29)-C(21)-C(20)  | 121,338    | N(30)-C(20)-C(19)  | 119,733    | N(30)-C(20)-C(19) | 111,431    |
| C(21)-C(20)-C(19)  | 128,797    | H(04)-C(19)-C(20)  | 129,432    | H(04)-C(19)-C(18) | 120,347    |
| C(20)-C(19)-C(18)  | 100,220    | C(19)-C(18)-N(31)  | 107,088    | C(19)-C(18)-N(17) | 131,914    |
| N(31)-C(18)-N(17)  | 121,993    | H(03)-N(17)-C(18)  | 109,737    | H(03)-N(17)-C(9)  | 108,183    |
| C(18)-N(17)-C(9)   | 117,734    | H(02)-C(17)-C(10)  | 119,404    | H(02)-C(17)-C(10) | 119,779    |
| C(10)-C(17)-C(10)  | 120,911    | H(01)-C(10)-C(17)  | 120,747    | H(01)-C(10)-C(13) | 120,049    |
| C(17)-C(10)-C(13)  | 119,204    | C(10)-C(13)-Cl(14) | 119,030    | C(10)-C(13)-C(12) | 121,019    |
| Cl(14)-C(13)-C(12) | 119,447    | H(00)-C(12)-C(13)  | 120,089    | H(00)-C(12)-C(11) | 120,777    |
| C(13)-C(12)-C(11)  | 119,130    | H(49)-C(11)-C(12)  | 119,147    | H(49)-C(11)-C(10) | 119,912    |
| C(12)-C(11)-C(10)  | 120,919    | C(11)-C(10)-C(17)  | 118,811    | C(11)-C(10)-C(9)  | 120,749    |
| C(17)-C(10)-C(9)   | 120,477    | H(48)-C(9)-N(17)   | 110,980    | H(48)-C(9)-C(10)  | 109,814    |
| H(48)-C(9)-P(2)    | 100,777    | N(17)-C(9)-C(10)   | 111,189    | N(17)-C(9)-P(2)   | 112,833    |
| C(10)-C(9)-P(2)    | 107,097    | H(47)-C(8)-H(46)   | 109,279    | H(47)-C(8)-H(40)  | 108,089    |
| H(47)-C(8)-C(7)    | 109,939    | H(46)-C(8)-H(40)   | 108,307    | H(46)-C(8)-C(7)   | 110,091    |
| H(40)-C(8)-C(7)    | 110,041    | H(44)-C(7)-H(43)   | 108,023    | H(44)-C(7)-C(8)   | 111,038    |
| H(44)-C(7)-O(6)    | 109,702    | H(43)-C(7)-C(8)    | 111,771    | H(43)-C(7)-O(6)   | 104,089    |
| C(8)-C(7)-O(6)     | 110,901    | C(7)-O(6)-P(2)     | 119,872    | H(42)-C(0)-H(41)  | 109,100    |
| H(42)-C(0)-H(40)   | 108,210    | H(42)-C(0)-C(4)    | 110,733    | H(41)-C(0)-H(40)  | 108,090    |
| H(41)-C(0)-C(4)    | 109,777    | H(40)-C(0)-C(4)    | 110,322    | H(39)-C(4)-H(38)  | 107,970    |
| H(39)-C(4)-C(0)    | 111,717    | H(39)-C(4)-O(3)    | 104,733    | H(38)-C(4)-C(0)   | 112,000    |
| H(38)-C(4)-O(3)    | 108,777    | C(0)-C(4)-O(3)     | 111,011    | C(4)-O(3)-P(2)    | 120,273    |
| C(4)-P(2)-O(6)     | 100,771    | C(4)-P(2)-O(3)     | 102,148    | C(4)-P(2)-O(1)    | 112,943    |
| O(6)-P(2)-O(3)     | 102,383    | O(6)-P(2)-O(1)     | 114,343    | O(3)-P(2)-O(1)    | 117,818    |

**Table S11:** Selected bond length (Å) of **2f**

| Bond                                  | Length(Å) | Bond                                  | Length(Å) | Bond                     | Length(Å) |
|---------------------------------------|-----------|---------------------------------------|-----------|--------------------------|-----------|
| N(ε <sub>0</sub> )-O(ε <sub>2</sub> ) | 1,230     | N(ε <sub>0</sub> )-O(ε <sub>1</sub> ) | 1,220     | C(39)-N(ε <sub>0</sub> ) | 1,470     |
| C(38)-H(γ <sub>3</sub> )              | 1,081     | C(38)-C(39)                           | 1,387     | N(30)-O(37)              | 1,232     |
| N(30)-O(36)                           | 1,229     | C(34)-C(38)                           | 1,388     | C(34)-N(30)              | 1,472     |
| C(33)-H(γ <sub>2</sub> )              | 1,082     | C(33)-C(34)                           | 1,390     | C(32)-H(γ <sub>1</sub> ) | 1,084     |
| C(32)-C(33)                           | 1,390     | C(31)-C(32)                           | 1,397     | C(31)-C(39)              | 1,403     |
| N(30)-C(31)                           | 1,417     | N(29)-N(30)                           | 1,363     | C(28)-H(γ <sub>0</sub> ) | 1,080     |
| C(27)-H(69)                           | 1,086     | C(27)-C(28)                           | 1,393     | C(26)-H(68)              | 1,086     |
| C(26)-C(27)                           | 1,390     | C(20)-H(67)                           | 1,086     | C(20)-C(26)              | 1,397     |
| C(24)-H(66)                           | 1,080     | C(24)-C(20)                           | 1,392     | C(23)-C(24)              | 1,404     |
| C(23)-C(28)                           | 1,402     | C(22)-N(29)                           | 1,337     | C(22)-C(23)              | 1,471     |
| C(21)-H(60)                           | 1,079     | C(21)-C(22)                           | 1,423     | C(20)-C(21)              | 1,377     |
| C(20)-N(30)                           | 1,374     | N(19)-H(64)                           | 1,017     | N(19)-C(20)              | 1,394     |
| C(18)-H(63)                           | 1,080     | C(17)-H(62)                           | 1,083     | C(17)-C(18)              | 1,392     |
| C(16)-H(61)                           | 1,099     | C(16)-H(60)                           | 1,097     | C(16)-H(09)              | 1,090     |
| C(10)-H(08)                           | 1,090     | C(10)-H(07)                           | 1,100     | C(10)-H(06)              | 1,098     |
| N(14)-C(16)                           | 1,404     | N(14)-C(10)                           | 1,401     | C(13)-C(17)              | 1,410     |
| C(13)-N(14)                           | 1,379     | C(12)-H(00)                           | 1,083     | C(12)-C(13)              | 1,417     |
| C(11)-H(04)                           | 1,088     | C(11)-C(12)                           | 1,388     | C(10)-C(11)              | 1,399     |
| C(10)-C(18)                           | 1,396     | C(9)-H(03)                            | 1,097     | C(9)-N(19)               | 1,474     |
| C(9)-C(10)                            | 1,017     | C(8)-H(02)                            | 1,092     | C(8)-H(01)               | 1,093     |
| C(8)-H(00)                            | 1,090     | C(7)-H(ε <sub>9</sub> )               | 1,099     | C(7)-H(ε <sub>8</sub> )  | 1,093     |
| C(7)-C(8)                             | 1,019     | O(6)-C(7)                             | 1,400     | C(0)-H(ε <sub>7</sub> )  | 1,090     |
| C(0)-H(ε <sub>6</sub> )               | 1,094     | C(0)-H(ε <sub>0</sub> )               | 1,093     | C(ε)-H(ε <sub>4</sub> )  | 1,090     |
| C(ε)-H(ε <sub>3</sub> )               | 1,094     | C(ε)-C(0)                             | 1,014     | O(3)-C(ε)                | 1,406     |
| P(γ)-C(9)                             | 1,879     | P(γ)-O(6)                             | 1,713     | P(γ)-O(3)                | 1,704     |
| O(1)-P(γ)                             | 1,492     |                                       |           |                          |           |



**Table S12:** Selected bond angle (°) of **2f**

| Angle             | (°) Degree | Angle             | (°) Degree | Angle             | (°) Degree |
|-------------------|------------|-------------------|------------|-------------------|------------|
| O(ε2)-N(ε0)-O(ε1) | 120,937    | O(ε2)-N(ε0)-C(39) | 117,038    | O(ε1)-N(ε0)-C(39) | 118,000    |
| N(ε0)-C(39)-C(38) | 117,092    | N(ε0)-C(39)-C(31) | 121,901    | C(38)-C(39)-C(31) | 121,εε0    |
| H(γ3)-C(38)-C(39) | 120,828    | H(γ3)-C(38)-C(3ε) | 121,139    | C(39)-C(38)-C(3ε) | 118,007    |
| O(37)-N(30)-O(36) | 12ε,721    | O(37)-N(30)-C(3ε) | 117,εε0    | O(36)-N(30)-C(3ε) | 117,80ε    |
| C(38)-C(3ε)-N(30) | 118,ε02    | C(38)-C(3ε)-C(33) | 122,3εε    | N(30)-C(3ε)-C(33) | 119,120    |
| H(γ2)-C(33)-C(3ε) | 119,828    | H(γ2)-C(33)-C(32) | 121,780    | C(3ε)-C(33)-C(32) | 118,ε27    |
| H(γ1)-C(32)-C(33) | 120,707    | H(γ1)-C(32)-C(31) | 118,300    | C(33)-C(32)-C(31) | 120,970    |
| C(32)-C(31)-C(39) | 118,711    | C(32)-C(31)-N(30) | 119,317    | C(39)-C(31)-N(30) | 122,027    |
| C(31)-N(30)-N(29) | 121,872    | C(31)-N(30)-C(20) | 120,238    | N(29)-N(30)-C(20) | 112,73ε    |
| N(30)-N(29)-C(22) | 10ε,ε30    | H(γ0)-C(28)-C(27) | 119,270    | H(γ0)-C(28)-C(23) | 120,001    |
| C(27)-C(28)-C(23) | 120,729    | H(69)-C(27)-C(28) | 119,7ε9    | H(69)-C(27)-C(26) | 120,102    |
| C(28)-C(27)-C(26) | 120,199    | H(78)-C(26)-C(27) | 120,23ε    | H(78)-C(26)-C(20) | 120,200    |
| C(27)-C(26)-C(20) | 119,011    | H(77)-C(20)-C(26) | 120,017    | H(77)-C(20)-C(2ε) | 119,708    |
| C(26)-C(20)-C(2ε) | 120,377    | H(76)-C(2ε)-C(20) | 120,071    | H(76)-C(2ε)-C(23) | 118,909    |
| C(20)-C(2ε)-C(23) | 120,030    | C(2ε)-C(23)-C(28) | 118,707    | C(2ε)-C(23)-C(22) | 120,008    |
| C(28)-C(23)-C(22) | 120,787    | N(29)-C(22)-C(23) | 120,777    | N(29)-C(22)-C(21) | 111,ε70    |
| C(23)-C(22)-C(21) | 127,800    | H(60)-C(21)-C(22) | 129,002    | H(60)-C(21)-C(20) | 120,707    |
| C(22)-C(21)-C(20) | 100,3ε1    | C(21)-C(20)-N(30) | 107,020    | C(21)-C(20)-N(19) | 133,073    |
| N(30)-C(20)-N(19) | 120,ε11    | H(6ε)-N(19)-C(20) | 110,ε72    | H(6ε)-N(19)-C(9)  | 110,397    |
| C(20)-N(19)-C(9)  | 110,18ε    | H(73)-C(18)-C(17) | 119,7ε7    | H(73)-C(18)-C(10) | 118,787    |
| C(17)-C(18)-C(10) | 121,ε31    | H(72)-C(17)-C(18) | 118,030    | H(72)-C(17)-C(13) | 120,2ε8    |
| C(18)-C(17)-C(13) | 121,21ε    | H(71)-C(16)-H(60) | 108,233    | H(71)-C(16)-H(09) | 108,127    |
| H(71)-C(16)-N(1ε) | 112,130    | H(60)-C(16)-H(09) | 107,111    | H(60)-C(16)-N(1ε) | 111,89ε    |
| H(09)-C(16)-N(1ε) | 109,108    | H(08)-C(10)-H(07) | 107,820    | H(08)-C(10)-H(07) | 107,770    |
| H(08)-C(10)-N(1ε) | 109,ε07    | H(07)-C(10)-H(07) | 107,871    | H(07)-C(10)-N(1ε) | 112,170    |
| H(07)-C(10)-N(1ε) | 111,729    | C(16)-N(1ε)-C(10) | 119,711    | C(16)-N(1ε)-C(13) | 120,3ε3    |
| C(10)-N(1ε)-C(13) | 119,9ε0    | C(17)-C(13)-N(1ε) | 121,737    | C(17)-C(13)-C(12) | 117,9εε    |
| N(1ε)-C(13)-C(12) | 121,310    | H(00)-C(12)-C(13) | 120,ε80    | H(00)-C(12)-C(11) | 118,0ε2    |
| C(13)-C(12)-C(11) | 120,971    | H(0ε)-C(11)-C(12) | 118,777    | H(0ε)-C(11)-C(10) | 119,ε79    |
| C(12)-C(11)-C(10) | 121,7ε1    | C(11)-C(10)-C(18) | 117,79ε    | C(11)-C(10)-C(9)  | 119,780    |
| C(18)-C(10)-C(9)  | 122,ε78    | H(03)-C(9)-N(19)  | 108,333    | H(03)-C(9)-C(10)  | 107,037    |
| H(03)-C(9)-P(2)   | 103,ε77    | N(19)-C(9)-C(10)  | 11ε,228    | N(19)-C(9)-P(2)   | 107,977    |
| C(10)-C(9)-P(2)   | 11ε,700    | H(02)-C(8)-H(01)  | 108,789    | H(02)-C(8)-H(00)  | 109,108    |
| H(02)-C(8)-C(7)   | 110,300    | H(01)-C(8)-H(00)  | 108,710    | H(01)-C(8)-C(7)   | 110,311    |
| H(00)-C(8)-C(7)   | 109,720    | H(ε9)-C(7)-H(ε8)  | 107,807    | H(ε9)-C(7)-C(8)   | 110,80ε    |
| H(ε9)-C(7)-O(7)   | 110,307    | H(ε8)-C(7)-C(8)   | 111,782    | H(ε8)-C(7)-O(7)   | 10ε,7ε1    |
| C(8)-C(7)-O(7)    | 111,333    | C(7)-O(7)-P(2)    | 118,382    | H(ε7)-C(0)-H(ε7)  | 108,080    |
| H(ε7)-C(0)-H(ε0)  | 108,782    | H(ε7)-C(0)-C(ε)   | 109,820    | H(ε7)-C(0)-H(ε0)  | 108,97ε    |
| H(ε7)-C(0)-C(ε)   | 110,008    | H(ε0)-C(0)-C(ε)   | 110,087    | H(εε)-C(ε)-H(ε3)  | 108,ε38    |
| H(εε)-C(ε)-C(0)   | 110,077    | H(εε)-C(ε)-O(3)   | 109,887    | H(ε3)-C(ε)-C(0)   | 112,010    |
| H(ε3)-C(ε)-O(3)   | 108,020    | C(0)-C(ε)-O(3)    | 107,303    | C(ε)-O(3)-P(2)    | 117,988    |
| C(9)-P(2)-O(7)    | 10ε,910    | C(9)-P(2)-O(3)    | 108,321    | C(9)-P(2)-O(1)    | 109,990    |
| O(7)-P(2)-O(3)    | 97,973     | O(7)-P(2)-O(1)    | 117,391    | O(3)-P(2)-O(1)    | 117,033    |

**Table S13:** Selected bond length (Å) of 4a

| Bond        | Length(Å) | Bond        | Length(Å) | Bond        | Length(Å) |
|-------------|-----------|-------------|-----------|-------------|-----------|
| C(εο)-H(γζ) | 1,084     | C(εε)-H(γ1) | 1,086     | C(εε)-C(εο) | 1,393     |
| C(εζ)-H(γο) | 1,086     | C(εζ)-C(εε) | 1,397     | C(εζ)-H(γ9) | 1,086     |
| C(εζ)-C(εζ) | 1,39ο     | C(ε1)-H(γ8) | 1,087     | C(ε1)-C(εζ) | 1,39ο     |
| C(εο)-C(ε1) | 1,4οο     | C(εο)-C(εο) | 1,39ο     | N(ζ9)-C(εο) | 1,422     |
| N(ζ8)-N(ζ9) | 1,361     | C(ζγ)-H(γγ) | 1,083     | C(ζ6)-H(γ6) | 1,083     |
| C(ζ6)-C(ζγ) | 1,388     | N(ζζ)-O(ζο) | 1,233     | N(ζζ)-O(ζε) | 1,234     |
| C(ζ2)-C(ζ6) | 1,393     | C(ζ2)-N(ζζ) | 1,46ο     | C(ζ1)-H(γο) | 1,083     |
| C(ζ1)-C(ζ2) | 1,396     | C(ζο)-H(γε) | 1,084     | C(ζο)-C(ζ1) | 1,387     |
| C(ζ9)-C(ζο) | 1,4ο8     | C(ζ9)-C(ζγ) | 1,4οο     | C(ζ8)-N(ζ8) | 1,33ο     |
| C(ζ8)-C(ζ9) | 1,467     | C(ζγ)-H(γζ) | 1,078     | C(ζγ)-C(ζ8) | 1,422     |
| C(ζ6)-C(ζγ) | 1,383     | C(ζ6)-N(ζ9) | 1,372     | N(ζο)-H(γ2) | 1,012     |
| N(ζο)-C(ζ6) | 1,386     | C(ζε)-H(γ1) | 1,086     | C(ζ3)-H(γο) | 1,086     |
| C(ζ3)-C(ζε) | 1,394     | C(ζ2)-H(ο9) | 1,087     | C(ζ2)-C(ζ3) | 1,393     |
| O(ζ1)-H(ο8) | ο,966     | C(ζο)-C(ζ2) | 1,4ο1     | C(ζο)-O(ζ1) | 1,364     |
| C(19)-H(ογ) | 1,086     | C(19)-C(2ο) | 1,39ο     | C(18)-C(19) | 1,396     |
| C(18)-C(2ε) | 1,398     | C(1γ)-H(ο6) | 1,094     | C(1γ)-N(2ο) | 1,447     |
| C(1γ)-C(18) | 1,ο14     | C(16)-H(οο) | 1,083     | C(1ο)-H(οε) | 1,08ο     |
| C(1ο)-C(16) | 1,394     | C(1ε)-H(ο3) | 1,086     | C(1ε)-C(1ο) | 1,397     |
| C(13)-H(ο2) | 1,086     | C(13)-C(1ε) | 1,396     | C(12)-H(ο1) | 1,08ο     |
| C(12)-C(13) | 1,396     | C(11)-C(12) | 1,393     | C(11)-C(16) | 1,394     |
| O(1ο)-C(11) | 1,396     | C(9)-H(οο)  | 1,084     | C(8)-H(ε9)  | 1,086     |
| C(8)-C(9)   | 1,39ο     | C(γ)-H(ε8)  | 1,086     | C(γ)-C(8)   | 1,396     |
| C(6)-H(εγ)  | 1,086     | C(6)-C(γ)   | 1,396     | C(ο)-H(ε6)  | 1,084     |
| C(ο)-C(6)   | 1,394     | C(ε)-C(ο)   | 1,392     | C(ε)-C(9)   | 1,391     |
| O(ζ)-C(ε)   | 1,397     | P(γ)-C(1γ)  | 1,888     | P(γ)-O(1ο)  | 1,63ο     |
| P(γ)-O(ζ)   | 1,61ο     | O(1)-P(γ)   | 1,484     |             |           |

**Table S14:** Selected bond angle (°) of 4a

| Angle             | (°) Degree | Angle             | (°) Degree | Angle             | (°) Degree |
|-------------------|------------|-------------------|------------|-------------------|------------|
| H(٧٢)-C(٤٥)-C(٤٤) | ١٢١,٦٦٩    | H(٧٢)-C(٤٥)-C(٤٠) | ١١٩,١٧٧    | C(٤٤)-C(٤٥)-C(٤٠) | ١١٩,١٥٤    |
| H(٧١)-C(٤٤)-C(٤٥) | ١١٩,٦٣٩    | H(٧١)-C(٤٤)-C(٤٣) | ١٢٠,٠٥٧    | C(٤٥)-C(٤٤)-C(٤٣) | ١٢٠,٣٠١    |
| H(٧٠)-C(٤٣)-C(٤٤) | ١١٩,٩٤٩    | H(٧٠)-C(٤٣)-C(٤٢) | ١٢٠,٠٠٥    | C(٤٤)-C(٤٣)-C(٤٢) | ١٢٠,٠٤٤    |
| H(٦٩)-C(٤٢)-C(٤٣) | ١٢٠,٢٣١    | H(٦٩)-C(٤٢)-C(٤١) | ١١٩,٤٤٦    | C(٤٣)-C(٤٢)-C(٤١) | ١٢٠,٣١١    |
| H(٦٨)-C(٤١)-C(٤٢) | ١٢١,٥٦٥    | H(٦٨)-C(٤١)-C(٤٠) | ١١٩,٤١٤    | C(٤٢)-C(٤١)-C(٤٠) | ١١٨,٩٩٧    |
| C(٤١)-C(٤٠)-C(٤٥) | ١٢١,١٦٢    | C(٤١)-C(٤٠)-N(٣٩) | ١١٩,٠٣١    | C(٤٥)-C(٤٠)-N(٣٩) | ١١٩,٨٠٦    |
| C(٤٠)-N(٣٩)-N(٣٨) | ١٢٠,٧٨٤    | C(٤٠)-N(٣٩)-C(٢٦) | ١٢٦,٨٤٩    | N(٣٨)-N(٣٩)-C(٢٦) | ١١٢,٢٦٦    |
| N(٣٩)-N(٣٨)-C(٢٨) | ١٠٤,٦٨٢    | H(٦٧)-C(٣٧)-C(٣٦) | ١١٩,١٤٢    | H(٦٧)-C(٣٧)-C(٢٩) | ١١٩,٨٦٢    |
| C(٣٦)-C(٣٧)-C(٢٩) | ١٢٠,٩٨٠    | H(٦٦)-C(٣٦)-C(٣٧) | ١٢١,٦٠٩    | H(٦٦)-C(٣٦)-C(٣٢) | ١١٩,٤٢٠    |
| C(٣٧)-C(٣٦)-C(٣٢) | ١١٨,٩٦٩    | O(٣٥)-N(٣٣)-O(٣٤) | ١٢٤,٢٩٧    | O(٣٥)-N(٣٣)-C(٣٢) | ١١٧,٨٦٨    |
| O(٣٤)-N(٣٣)-C(٣٢) | ١١٧,٨٣٥    | C(٣٦)-C(٣٢)-N(٣٣) | ١١٩,٢٤٥    | C(٣٦)-C(٣٢)-C(٣١) | ١٢١,٤٧١    |
| N(٣٣)-C(٣٢)-C(٣١) | ١١٩,٢٨٣    | H(٦٥)-C(٣١)-C(٣٢) | ١١٩,٤٣٣    | H(٦٥)-C(٣١)-C(٣٠) | ١٢١,٥٦٥    |
| C(٣٢)-C(٣١)-C(٣٠) | ١١٩,٠٠١    | H(٦٤)-C(٣٠)-C(٣١) | ١٢٠,٣٢٣    | H(٦٤)-C(٣٠)-C(٢٩) | ١١٨,٧٦٩    |
| C(٣١)-C(٣٠)-C(٢٩) | ١٢٠,٩٠٨    | C(٣٠)-C(٢٩)-C(٣٧) | ١١٨,٦٦١    | C(٣٠)-C(٢٩)-C(٢٨) | ١٢٠,٢٥٥    |
| C(٣٧)-C(٢٩)-C(٢٨) | ١٢١,٠٧٦    | N(٣٨)-C(٢٨)-C(٢٩) | ١١٩,٧٥١    | N(٣٨)-C(٢٨)-C(٢٧) | ١١١,٨١٠    |
| C(٢٩)-C(٢٨)-C(٢٧) | ١٢٨,٤٣٣    | H(٦٣)-C(٢٧)-C(٢٨) | ١٢٨,١٧١    | H(٦٣)-C(٢٧)-C(٢٦) | ١٢٧,٢١٣    |
| C(٢٨)-C(٢٧)-C(٢٦) | ١٠٤,٦٠٤    | C(٢٧)-C(٢٦)-N(٣٩) | ١٠٦,٦١٢    | C(٢٧)-C(٢٦)-N(٢٥) | ١٣١,٨٩٠    |
| N(٣٩)-C(٢٦)-N(٢٥) | ١٢١,٢٦٩    | H(٦٢)-N(٢٥)-C(٢٦) | ١١٣,٥٥٩    | H(٦٢)-N(٢٥)-C(١٧) | ١١٤,٧٣٩    |
| C(٢٦)-N(٢٥)-C(١٧) | ١١٩,٧٣٦    | H(٦١)-C(٢٤)-C(٢٣) | ١٢٠,١٥٢    | H(٦١)-C(٢٤)-C(١٨) | ١١٩,٩٦٤    |
| C(٢٣)-C(٢٤)-C(١٨) | ١١٩,٨٨٤    | H(٦٠)-C(٢٣)-C(٢٤) | ١١٩,٨٧٨    | H(٦٠)-C(٢٣)-C(٢٢) | ١١٩,٥٠١    |
| C(٢٤)-C(٢٣)-C(٢٢) | ١٢٠,٦٢١    | H(٥٩)-C(٢٢)-C(٢٣) | ١٢٠,٥٤٦    | H(٥٩)-C(٢٢)-C(٢٠) | ١٢٠,٠٠٩    |
| C(٢٣)-C(٢٢)-C(٢٠) | ١١٩,٤٤٥    | H(٥٨)-O(٢١)-C(٢٠) | ١٠٩,٥١١    | C(٢٢)-C(٢٠)-O(٢١) | ١٢٢,٨٥٣    |
| C(٢٢)-C(٢٠)-C(١٩) | ١٢٠,١٢٩    | O(٢١)-C(٢٠)-C(١٩) | ١١٧,٠١٦    | H(٥٧)-C(١٩)-C(٢٠) | ١١٧,٧١٤    |
| H(٥٧)-C(١٩)-C(١٨) | ١٢٢,٠٨٥    | C(٢٠)-C(١٩)-C(١٨) | ١٢٠,١٧٤    | C(١٩)-C(١٨)-C(٢٤) | ١١٩,٧٤٥    |
| C(١٩)-C(١٨)-C(١٧) | ١٢٠,٥٧٥    | C(٢٤)-C(١٨)-C(١٧) | ١١٩,٦١٧    | H(٥٦)-C(١٧)-N(٢٥) | ١٠٧,٧٧١    |
| H(٥٦)-C(١٧)-C(١٨) | ١٠٨,٥٩١    | H(٥٦)-C(١٧)-P(٢)  | ١٠٣,٥٥٣    | N(٢٥)-C(١٧)-C(١٨) | ١١٢,٦٤٦    |
| N(٢٥)-C(١٧)-P(٢)  | ١١٢,٥٨٨    | C(١٨)-C(١٧)-P(٢)  | ١١١,١٥٧    | H(٥٥)-C(١٦)-C(١٥) | ١٢١,٨١٠    |
| H(٥٥)-C(١٦)-C(١١) | ١١٩,٥٨٨    | C(١٥)-C(١٦)-C(١١) | ١١٨,٥٩٠    | H(٥٤)-C(١٥)-C(١٦) | ١١٩,٣٨٥    |
| H(٥٤)-C(١٥)-C(١٤) | ١٢٠,٠٠٥    | C(١٦)-C(١٥)-C(١٤) | ١٢٠,٦٠٧    | H(٥٣)-C(١٤)-C(١٥) | ١١٩,٩٩٠    |
| H(٥٣)-C(١٤)-C(١٣) | ١٢٠,٠٨٠    | C(١٥)-C(١٤)-C(١٣) | ١١٩,٩٣٠    | H(٥٢)-C(١٣)-C(١٤) | ١٢٠,٢٣٢    |
| H(٥٢)-C(١٣)-C(١٢) | ١١٩,٦٢٢    | C(١٤)-C(١٣)-C(١٢) | ١٢٠,١٤٦    | H(٥١)-C(١٢)-C(١٣) | ١٢١,٨٣٦    |
| H(٥١)-C(١٢)-C(١١) | ١١٩,١٣٦    | C(١٣)-C(١٢)-C(١١) | ١١٩,٠١٩    | C(١٢)-C(١١)-C(١٦) | ١٢١,٧٠٦    |
| C(١٢)-C(١١)-O(١٠) | ١١٧,٢٤٧    | C(١٦)-C(١١)-O(١٠) | ١٢١,٠٢٩    | C(١١)-O(١٠)-P(٢)  | ١٢٠,٩٨٦    |
| H(٥٠)-C(٩)-C(٨)   | ١٢٢,٠١١    | H(٥٠)-C(٩)-C(٤)   | ١١٩,٢٦٩    | C(٨)-C(٩)-C(٤)    | ١١٨,٧١٩    |
| H(٤٩)-C(٨)-C(٩)   | ١١٩,٤٧١    | H(٤٩)-C(٨)-C(٧)   | ١٢٠,١٤٢    | C(٩)-C(٨)-C(٧)    | ١٢٠,٣٨٥    |
| H(٤٨)-C(٧)-C(٨)   | ١٢٠,١١١    | H(٤٨)-C(٧)-C(٦)   | ١٢٠,٠٠٩    | C(٨)-C(٧)-C(٦)    | ١١٩,٨٨٠    |
| H(٤٧)-C(٦)-C(٧)   | ١٢٠,١٦٧    | H(٤٧)-C(٦)-C(٥)   | ١١٩,٤٢٠    | C(٧)-C(٦)-C(٥)    | ١٢٠,٤١٣    |
| H(٤٦)-C(٥)-C(٦)   | ١٢١,٤٥٨    | H(٤٦)-C(٥)-C(٤)   | ١١٩,٨٥٤    | C(٦)-C(٥)-C(٤)    | ١١٨,٦٨٦    |
| C(٥)-C(٤)-C(٩)    | ١٢١,٩١٣    | C(٥)-C(٤)-O(٣)    | ١٢٠,٨١٩    | C(٩)-C(٤)-O(٣)    | ١١٧,٢٣٣    |
| C(٤)-O(٣)-P(٢)    | ١٢٧,٦٧٦    | C(١٧)-P(٢)-O(١٠)  | ١٠٣,٧٧٠    | C(١٧)-P(٢)-O(٣)   | ١٠٦,٣١٦    |
| C(١٧)-P(٢)-O(١)   | ١١٣,٨١٨    | O(١٠)-P(٢)-O(٣)   | ١٠٠,٠٨٥    | O(١٠)-P(٢)-O(١)   | ١١٦,٨٧٧    |
| O(٣)-P(٢)-O(١)    | ١١٤,٤٠٧    |                   |            |                   |            |

**Table S15:** Selected bond length (Å) of **4b**

| Bond        | Length(Å) | Bond        | Length(Å) | Bond        | Length(Å) |
|-------------|-----------|-------------|-----------|-------------|-----------|
| C(εγ)-H(γζ) | 1,084     | C(εγ)-H(γζ) | 1,087     | C(εγ)-C(εγ) | 1,393     |
| C(εο)-H(γ1) | 1,087     | C(εο)-C(εγ) | 1,397     | C(εε)-H(γο) | 1,087     |
| C(εε)-C(εο) | 1,397     | C(εζ)-H(γ9) | 1,083     | C(εζ)-C(εε) | 1,394     |
| C(εγ)-C(εζ) | 1,398     | C(εγ)-C(εγ) | 1,398     | N(ε1)-C(εγ) | 1,422     |
| N(εο)-N(ε1) | 1,3ο7     | C(ζ9)-H(γ8) | 1,084     | C(ζ8)-H(γγ) | 1,083     |
| C(ζ8)-C(ζ9) | 1,389     | N(ζο)-O(ζγ) | 1,233     | N(ζο)-O(ζγ) | 1,232     |
| C(ζε)-C(ζ8) | 1,393     | C(ζε)-N(ζο) | 1,477     | C(ζζ)-H(γγ) | 1,083     |
| C(ζζ)-C(ζε) | 1,39ο     | C(ζγ)-H(γο) | 1,084     | C(ζγ)-C(ζζ) | 1,387     |
| C(ζ1)-C(ζγ) | 1,4ο8     | C(ζ1)-C(ζ9) | 1,4ο7     | C(ζο)-N(εο) | 1,337     |
| C(ζο)-C(ζ1) | 1,477     | C(γ9)-H(γε) | 1,ο78     | C(γ9)-C(ζο) | 1,42ο     |
| C(γ8)-C(γ9) | 1,377     | C(γ8)-N(ε1) | 1,378     | N(γγ)-H(γζ) | 1,ο17     |
| N(γγ)-C(γ8) | 1,4ο3     | C(γγ)-H(γγ) | 1,ο8ο     | C(γο)-H(γ1) | 1,083     |
| C(γο)-C(γγ) | 1,391     | N(γγ)-O(γε) | 1,231     | N(γγ)-O(γζ) | 1,231     |
| C(γ1)-C(γο) | 1,393     | C(γ1)-N(γγ) | 1,473     | C(γο)-H(γο) | 1,083     |
| C(γο)-C(γ1) | 1,393     | C(19)-H(ο9) | 1,087     | C(19)-C(γο) | 1,39ο     |
| C(18)-C(19) | 1,4οο     | C(18)-C(γγ) | 1,399     | C(1γ)-H(ο8) | 1,ο92     |
| C(1γ)-N(γγ) | 1,474     | C(1γ)-C(18) | 1,ο1ο     | C(1γ)-H(ογ) | 1,083     |
| C(1ο)-H(ογ) | 1,ο8ο     | C(1ο)-C(1γ) | 1,39ο     | C(1ε)-H(οο) | 1,08ο     |
| C(1ε)-C(1ο) | 1,397     | C(1ζ)-H(οε) | 1,087     | C(1ζ)-C(1ε) | 1,39ο     |
| C(1γ)-H(οζ) | 1,ο8ο     | C(1γ)-C(1ζ) | 1,39ο     | C(11)-C(1γ) | 1,392     |
| C(11)-C(1γ) | 1,393     | O(1ο)-C(11) | 1,4ο2     | C(9)-H(ο2)  | 1,08ο     |
| C(8)-H(ο1)  | 1,087     | C(8)-C(9)   | 1,39ο     | C(γ)-H(οο)  | 1,087     |
| C(γ)-C(8)   | 1,397     | C(γ)-H(ε9)  | 1,087     | C(γ)-C(γ)   | 1,397     |
| C(ο)-H(ε8)  | 1,08ο     | C(ο)-C(γ)   | 1,39ο     | C(ε)-C(ο)   | 1,391     |
| C(ε)-C(9)   | 1,39ο     | O(ζ)-C(ε)   | 1,4ο2     | P(γ)-C(1γ)  | 1,874     |
| P(γ)-O(1ο)  | 1,728     | P(γ)-O(ζ)   | 1,712     | O(1)-P(γ)   | 1,48ο     |

**Table S16:** Selected bond angle (°) of **4b**

| Angle                                                    | (°) Degree | Angle                                                    | (°) Degree | Angle                                                    | (°) Degree |
|----------------------------------------------------------|------------|----------------------------------------------------------|------------|----------------------------------------------------------|------------|
| H(ν <sub>3</sub> )-C(ε <sub>ν</sub> )-C(ε <sub>τ</sub> ) | 121,734    | H(ν <sub>3</sub> )-C(ε <sub>ν</sub> )-C(ε <sub>γ</sub> ) | 118,802    | C(ε <sub>τ</sub> )-C(ε <sub>ν</sub> )-C(ε <sub>γ</sub> ) | 119,414    |
| H(ν <sub>2</sub> )-C(ε <sub>τ</sub> )-C(ε <sub>ν</sub> ) | 119,403    | H(ν <sub>2</sub> )-C(ε <sub>τ</sub> )-C(ε <sub>ο</sub> ) | 120,104    | C(ε <sub>ν</sub> )-C(ε <sub>τ</sub> )-C(ε <sub>ο</sub> ) | 120,441    |
| H(ν <sub>1</sub> )-C(ε <sub>ο</sub> )-C(ε <sub>τ</sub> ) | 120,211    | H(ν <sub>1</sub> )-C(ε <sub>ο</sub> )-C(ε <sub>ε</sub> ) | 120,174    | C(ε <sub>τ</sub> )-C(ε <sub>ο</sub> )-C(ε <sub>ε</sub> ) | 119,710    |
| H(ν <sub>ο</sub> )-C(ε <sub>ε</sub> )-C(ε <sub>ο</sub> ) | 120,178    | H(ν <sub>ο</sub> )-C(ε <sub>ε</sub> )-C(ε <sub>γ</sub> ) | 119,200    | C(ε <sub>ο</sub> )-C(ε <sub>ε</sub> )-C(ε <sub>γ</sub> ) | 120,077    |
| H(τ <sub>9</sub> )-C(ε <sub>γ</sub> )-C(ε <sub>ε</sub> ) | 120,920    | H(τ <sub>9</sub> )-C(ε <sub>γ</sub> )-C(ε <sub>γ</sub> ) | 119,770    | C(ε <sub>ε</sub> )-C(ε <sub>γ</sub> )-C(ε <sub>γ</sub> ) | 119,290    |
| C(ε <sub>γ</sub> )-C(ε <sub>γ</sub> )-C(ε <sub>ν</sub> ) | 120,707    | C(ε <sub>γ</sub> )-C(ε <sub>γ</sub> )-N(ε <sub>1</sub> ) | 120,079    | C(ε <sub>ν</sub> )-C(ε <sub>γ</sub> )-N(ε <sub>1</sub> ) | 118,702    |
| C(ε <sub>γ</sub> )-N(ε <sub>1</sub> )-N(ε <sub>ο</sub> ) | 119,994    | C(ε <sub>γ</sub> )-N(ε <sub>1</sub> )-C(γ <sub>8</sub> ) | 128,109    | N(ε <sub>ο</sub> )-N(ε <sub>1</sub> )-C(γ <sub>8</sub> ) | 111,007    |
| N(ε <sub>1</sub> )-N(ε <sub>ο</sub> )-C(γ <sub>ο</sub> ) | 100,397    | H(τ <sub>8</sub> )-C(γ <sub>9</sub> )-C(γ <sub>8</sub> ) | 119,037    | H(τ <sub>8</sub> )-C(γ <sub>9</sub> )-C(γ <sub>1</sub> ) | 119,904    |
| C(γ <sub>8</sub> )-C(γ <sub>9</sub> )-C(γ <sub>1</sub> ) | 121,009    | H(τ <sub>ν</sub> )-C(γ <sub>8</sub> )-C(γ <sub>9</sub> ) | 121,777    | H(τ <sub>ν</sub> )-C(γ <sub>8</sub> )-C(γ <sub>ε</sub> ) | 119,477    |
| C(γ <sub>9</sub> )-C(γ <sub>8</sub> )-C(γ <sub>ε</sub> ) | 118,848    | O(γ <sub>ν</sub> )-N(γ <sub>ο</sub> )-O(γ <sub>τ</sub> ) | 124,404    | O(γ <sub>ν</sub> )-N(γ <sub>ο</sub> )-C(γ <sub>ε</sub> ) | 117,718    |
| O(γ <sub>τ</sub> )-N(γ <sub>ο</sub> )-C(γ <sub>ε</sub> ) | 117,828    | C(γ <sub>8</sub> )-C(γ <sub>ε</sub> )-N(γ <sub>ο</sub> ) | 119,128    | C(γ <sub>8</sub> )-C(γ <sub>ε</sub> )-C(γ <sub>γ</sub> ) | 121,078    |
| N(γ <sub>ο</sub> )-C(γ <sub>ε</sub> )-C(γ <sub>γ</sub> ) | 119,293    | H(τ <sub>1</sub> )-C(γ <sub>γ</sub> )-C(γ <sub>ε</sub> ) | 119,433    | H(τ <sub>1</sub> )-C(γ <sub>γ</sub> )-C(γ <sub>γ</sub> ) | 121,700    |
| C(γ <sub>ε</sub> )-C(γ <sub>γ</sub> )-C(γ <sub>γ</sub> ) | 118,977    | H(τ <sub>ο</sub> )-C(γ <sub>γ</sub> )-C(γ <sub>γ</sub> ) | 120,287    | H(τ <sub>ο</sub> )-C(γ <sub>γ</sub> )-C(γ <sub>1</sub> ) | 118,778    |
| C(γ <sub>γ</sub> )-C(γ <sub>γ</sub> )-C(γ <sub>1</sub> ) | 120,931    | C(γ <sub>γ</sub> )-C(γ <sub>1</sub> )-C(γ <sub>9</sub> ) | 118,713    | C(γ <sub>γ</sub> )-C(γ <sub>1</sub> )-C(γ <sub>ο</sub> ) | 120,447    |
| C(γ <sub>9</sub> )-C(γ <sub>1</sub> )-C(γ <sub>ο</sub> ) | 120,907    | N(ε <sub>ο</sub> )-C(γ <sub>ο</sub> )-C(γ <sub>1</sub> ) | 120,008    | N(ε <sub>ο</sub> )-C(γ <sub>ο</sub> )-C(γ <sub>9</sub> ) | 111,223    |
| C(γ <sub>1</sub> )-C(γ <sub>ο</sub> )-C(γ <sub>9</sub> ) | 128,177    | H(τ <sub>ε</sub> )-C(γ <sub>9</sub> )-C(γ <sub>ο</sub> ) | 129,418    | H(τ <sub>ε</sub> )-C(γ <sub>9</sub> )-C(γ <sub>8</sub> ) | 120,323    |
| C(γ <sub>ο</sub> )-C(γ <sub>9</sub> )-C(γ <sub>8</sub> ) | 104,997    | C(γ <sub>9</sub> )-C(γ <sub>8</sub> )-N(ε <sub>1</sub> ) | 107,799    | C(γ <sub>9</sub> )-C(γ <sub>8</sub> )-N(γ <sub>ν</sub> ) | 130,907    |
| N(ε <sub>1</sub> )-C(γ <sub>8</sub> )-N(γ <sub>ν</sub> ) | 122,277    | H(τ <sub>γ</sub> )-N(γ <sub>ν</sub> )-C(γ <sub>8</sub> ) | 108,110    | H(τ <sub>γ</sub> )-N(γ <sub>ν</sub> )-C(γ <sub>ν</sub> ) | 110,007    |
| C(γ <sub>8</sub> )-N(γ <sub>ν</sub> )-C(γ <sub>ν</sub> ) | 114,491    | H(τ <sub>γ</sub> )-C(γ <sub>τ</sub> )-C(γ <sub>ο</sub> ) | 119,421    | H(τ <sub>γ</sub> )-C(γ <sub>τ</sub> )-C(γ <sub>8</sub> ) | 120,022    |
| C(γ <sub>ο</sub> )-C(γ <sub>τ</sub> )-C(γ <sub>8</sub> ) | 120,007    | H(τ <sub>1</sub> )-C(γ <sub>ο</sub> )-C(γ <sub>τ</sub> ) | 121,741    | H(τ <sub>1</sub> )-C(γ <sub>ο</sub> )-C(γ <sub>1</sub> ) | 119,477    |
| C(γ <sub>τ</sub> )-C(γ <sub>ο</sub> )-C(γ <sub>1</sub> ) | 118,781    | O(γ <sub>ε</sub> )-N(γ <sub>γ</sub> )-O(γ <sub>γ</sub> ) | 124,704    | O(γ <sub>ε</sub> )-N(γ <sub>γ</sub> )-C(γ <sub>1</sub> ) | 117,703    |
| O(γ <sub>γ</sub> )-N(γ <sub>γ</sub> )-C(γ <sub>1</sub> ) | 117,093    | C(γ <sub>ο</sub> )-C(γ <sub>1</sub> )-N(γ <sub>γ</sub> ) | 119,130    | C(γ <sub>ο</sub> )-C(γ <sub>1</sub> )-C(γ <sub>ο</sub> ) | 121,920    |
| N(γ <sub>γ</sub> )-C(γ <sub>1</sub> )-C(γ <sub>ο</sub> ) | 118,944    | H(τ <sub>ο</sub> )-C(γ <sub>ο</sub> )-C(γ <sub>1</sub> ) | 119,727    | H(τ <sub>ο</sub> )-C(γ <sub>ο</sub> )-C(γ <sub>9</sub> ) | 121,877    |
| C(γ <sub>1</sub> )-C(γ <sub>ο</sub> )-C(γ <sub>9</sub> ) | 118,008    | H(ο <sub>9</sub> )-C(γ <sub>9</sub> )-C(γ <sub>ο</sub> ) | 119,001    | H(ο <sub>9</sub> )-C(γ <sub>9</sub> )-C(γ <sub>8</sub> ) | 119,770    |
| C(γ <sub>ο</sub> )-C(γ <sub>9</sub> )-C(γ <sub>8</sub> ) | 120,828    | C(γ <sub>9</sub> )-C(γ <sub>8</sub> )-C(γ <sub>τ</sub> ) | 119,397    | C(γ <sub>9</sub> )-C(γ <sub>8</sub> )-C(γ <sub>ν</sub> ) | 119,098    |
| C(γ <sub>τ</sub> )-C(γ <sub>8</sub> )-C(γ <sub>ν</sub> ) | 121,407    | H(ο <sub>8</sub> )-C(γ <sub>ν</sub> )-N(γ <sub>ν</sub> ) | 107,979    | H(ο <sub>8</sub> )-C(γ <sub>ν</sub> )-C(γ <sub>8</sub> ) | 108,137    |
| H(ο <sub>8</sub> )-C(γ <sub>ν</sub> )-P(γ <sub>2</sub> ) | 104,327    | N(γ <sub>ν</sub> )-C(γ <sub>ν</sub> )-C(γ <sub>8</sub> ) | 114,178    | N(γ <sub>ν</sub> )-C(γ <sub>ν</sub> )-P(γ <sub>2</sub> ) | 109,212    |
| C(γ <sub>8</sub> )-C(γ <sub>ν</sub> )-P(γ <sub>2</sub> ) | 112,403    | H(ο <sub>ν</sub> )-C(γ <sub>τ</sub> )-C(γ <sub>ο</sub> ) | 121,940    | H(ο <sub>ν</sub> )-C(γ <sub>τ</sub> )-C(γ <sub>1</sub> ) | 119,470    |
| C(γ <sub>ο</sub> )-C(γ <sub>τ</sub> )-C(γ <sub>1</sub> ) | 118,081    | H(ο <sub>τ</sub> )-C(γ <sub>ο</sub> )-C(γ <sub>τ</sub> ) | 119,001    | H(ο <sub>τ</sub> )-C(γ <sub>ο</sub> )-C(γ <sub>ε</sub> ) | 119,921    |
| C(γ <sub>τ</sub> )-C(γ <sub>ο</sub> )-C(γ <sub>ε</sub> ) | 120,022    | H(ο <sub>ο</sub> )-C(γ <sub>ε</sub> )-C(γ <sub>ο</sub> ) | 119,890    | H(ο <sub>ο</sub> )-C(γ <sub>ε</sub> )-C(γ <sub>γ</sub> ) | 120,101    |
| C(γ <sub>ο</sub> )-C(γ <sub>ε</sub> )-C(γ <sub>γ</sub> ) | 119,947    | H(ο <sub>ε</sub> )-C(γ <sub>γ</sub> )-C(γ <sub>ε</sub> ) | 120,187    | H(ο <sub>ε</sub> )-C(γ <sub>γ</sub> )-C(γ <sub>τ</sub> ) | 119,072    |
| C(γ <sub>ε</sub> )-C(γ <sub>γ</sub> )-C(γ <sub>τ</sub> ) | 120,241    | H(ο <sub>γ</sub> )-C(γ <sub>τ</sub> )-C(γ <sub>γ</sub> ) | 121,770    | H(ο <sub>γ</sub> )-C(γ <sub>τ</sub> )-C(γ <sub>1</sub> ) | 119,473    |
| C(γ <sub>γ</sub> )-C(γ <sub>τ</sub> )-C(γ <sub>1</sub> ) | 118,877    | C(γ <sub>τ</sub> )-C(γ <sub>1</sub> )-C(γ <sub>τ</sub> ) | 121,844    | C(γ <sub>τ</sub> )-C(γ <sub>1</sub> )-O(γ <sub>ο</sub> ) | 117,479    |
| C(γ <sub>τ</sub> )-C(γ <sub>1</sub> )-O(γ <sub>ο</sub> ) | 120,709    | C(γ <sub>1</sub> )-O(γ <sub>ο</sub> )-P(γ <sub>2</sub> ) | 120,838    | H(ο <sub>γ</sub> )-C(γ <sub>1</sub> )-C(γ <sub>8</sub> ) | 122,104    |
| H(ο <sub>γ</sub> )-C(γ <sub>1</sub> )-C(ε <sub>1</sub> ) | 119,177    | C(γ <sub>8</sub> )-C(γ <sub>1</sub> )-C(ε <sub>1</sub> ) | 118,729    | H(ο <sub>1</sub> )-C(γ <sub>8</sub> )-C(γ <sub>9</sub> ) | 119,078    |
| H(ο <sub>1</sub> )-C(γ <sub>8</sub> )-C(γ <sub>ν</sub> ) | 120,178    | C(γ <sub>9</sub> )-C(γ <sub>8</sub> )-C(γ <sub>ν</sub> ) | 120,203    | H(ο <sub>ο</sub> )-C(γ <sub>ν</sub> )-C(γ <sub>8</sub> ) | 120,029    |
| H(ο <sub>ο</sub> )-C(γ <sub>ν</sub> )-C(τ <sub>1</sub> ) | 120,002    | C(γ <sub>8</sub> )-C(γ <sub>ν</sub> )-C(τ <sub>1</sub> ) | 119,979    | H(ε <sub>9</sub> )-C(τ <sub>1</sub> )-C(γ <sub>ν</sub> ) | 120,123    |
| H(ε <sub>9</sub> )-C(τ <sub>1</sub> )-C(ο <sub>1</sub> ) | 119,409    | C(γ <sub>ν</sub> )-C(τ <sub>1</sub> )-C(ο <sub>1</sub> ) | 120,418    | H(ε <sub>8</sub> )-C(ο <sub>1</sub> )-C(τ <sub>1</sub> ) | 121,727    |
| H(ε <sub>8</sub> )-C(ο <sub>1</sub> )-C(ε <sub>1</sub> ) | 119,804    | C(τ <sub>1</sub> )-C(ο <sub>1</sub> )-C(ε <sub>1</sub> ) | 118,018    | C(ο <sub>1</sub> )-C(ε <sub>1</sub> )-C(γ <sub>9</sub> ) | 122,100    |
| C(ο <sub>1</sub> )-C(ε <sub>1</sub> )-O(γ <sub>3</sub> ) | 120,793    | C(γ <sub>9</sub> )-C(ε <sub>1</sub> )-O(γ <sub>3</sub> ) | 117,082    | C(ε <sub>1</sub> )-O(γ <sub>3</sub> )-P(γ <sub>2</sub> ) | 124,937    |
| C(γ <sub>ν</sub> )-P(γ <sub>2</sub> )-O(γ <sub>ο</sub> ) | 100,210    | C(γ <sub>ν</sub> )-P(γ <sub>2</sub> )-O(γ <sub>3</sub> ) | 104,820    | C(γ <sub>ν</sub> )-P(γ <sub>2</sub> )-O(γ <sub>1</sub> ) | 111,872    |
| O(γ <sub>ο</sub> )-P(γ <sub>2</sub> )-O(γ <sub>3</sub> ) | 99,930     | O(γ <sub>ο</sub> )-P(γ <sub>2</sub> )-O(γ <sub>1</sub> ) | 117,900    | O(γ <sub>3</sub> )-P(γ <sub>2</sub> )-O(γ <sub>1</sub> ) | 117,077    |

**Table S17:** Selected bond length (Å) of **4c**

| Bond                                  | Length(Å) | Bond                                  | Length(Å) | Bond                                  | Length(Å) |
|---------------------------------------|-----------|---------------------------------------|-----------|---------------------------------------|-----------|
| N(ε <sub>6</sub> )-O(ε <sub>8</sub> ) | 1,220     | N(ε <sub>6</sub> )-O(ε <sub>7</sub> ) | 1,228     | C(ε <sub>5</sub> )-N(ε <sub>6</sub> ) | 1,ε76     |
| C(ε <sub>4</sub> )-H(ν <sub>4</sub> ) | 1,082     | C(ε <sub>4</sub> )-C(ε <sub>5</sub> ) | 1,387     | N(ε <sub>1</sub> )-O(ε <sub>3</sub> ) | 1,230     |
| N(ε <sub>1</sub> )-O(ε <sub>2</sub> ) | 1,231     | C(ε <sub>0</sub> )-C(ε <sub>4</sub> ) | 1,389     | C(ε <sub>0</sub> )-N(ε <sub>1</sub> ) | 1,ε78     |
| C(ν <sub>9</sub> )-H(ν <sub>3</sub> ) | 1,083     | C(ν <sub>9</sub> )-C(ε <sub>0</sub> ) | 1,393     | C(ν <sub>8</sub> )-H(ν <sub>2</sub> ) | 1,083     |
| C(ν <sub>8</sub> )-C(ν <sub>9</sub> ) | 1,387     | C(ν <sub>7</sub> )-C(ν <sub>8</sub> ) | 1,ε06     | C(ν <sub>7</sub> )-C(ε <sub>5</sub> ) | 1,ε10     |
| N(ν <sub>6</sub> )-C(ν <sub>7</sub> ) | 1,290     | N(ν <sub>5</sub> )-N(ν <sub>6</sub> ) | 1,278     | C(ν <sub>4</sub> )-H(ν <sub>1</sub> ) | 1,080     |
| C(ν <sub>3</sub> )-H(ν <sub>0</sub> ) | 1,086     | C(ν <sub>3</sub> )-C(ν <sub>4</sub> ) | 1,391     | C(ν <sub>2</sub> )-H(ν <sub>9</sub> ) | 1,086     |
| C(ν <sub>2</sub> )-C(ν <sub>3</sub> ) | 1,397     | C(ν <sub>1</sub> )-H(ν <sub>8</sub> ) | 1,086     | C(ν <sub>1</sub> )-C(ν <sub>2</sub> ) | 1,290     |
| C(ν <sub>0</sub> )-H(ν <sub>7</sub> ) | 1,080     | C(ν <sub>0</sub> )-C(ν <sub>1</sub> ) | 1,393     | C(ν <sub>9</sub> )-C(ν <sub>0</sub> ) | 1,ε02     |
| C(ν <sub>9</sub> )-C(ν <sub>8</sub> ) | 1,ε03     | C(ν <sub>8</sub> )-N(ν <sub>5</sub> ) | 1,320     | C(ν <sub>8</sub> )-C(ν <sub>9</sub> ) | 1,ε78     |
| C(ν <sub>7</sub> )-H(ν <sub>6</sub> ) | 1,077     | C(ν <sub>7</sub> )-C(ν <sub>8</sub> ) | 1,ε26     | C(ν <sub>6</sub> )-C(ν <sub>7</sub> ) | 1,270     |
| C(ν <sub>6</sub> )-N(ν <sub>5</sub> ) | 1,288     | N(ν <sub>5</sub> )-H(ν <sub>5</sub> ) | 1,011     | N(ν <sub>5</sub> )-C(ν <sub>6</sub> ) | 1,281     |
| C(ν <sub>4</sub> )-H(ν <sub>4</sub> ) | 1,080     | C(ν <sub>3</sub> )-H(ν <sub>3</sub> ) | 1,086     | C(ν <sub>3</sub> )-C(ν <sub>4</sub> ) | 1,391     |
| C(ν <sub>2</sub> )-H(ν <sub>2</sub> ) | 1,087     | C(ν <sub>2</sub> )-C(ν <sub>3</sub> ) | 1,396     | O(ν <sub>1</sub> )-H(ν <sub>1</sub> ) | 0,966     |
| C(ν <sub>0</sub> )-C(ν <sub>2</sub> ) | 1,398     | C(ν <sub>0</sub> )-O(ν <sub>1</sub> ) | 1,26ε     | C(ν <sub>9</sub> )-H(ν <sub>0</sub> ) | 1,080     |
| C(ν <sub>9</sub> )-C(ν <sub>0</sub> ) | 1,399     | C(ν <sub>8</sub> )-C(ν <sub>9</sub> ) | 1,390     | C(ν <sub>8</sub> )-C(ν <sub>4</sub> ) | 1,ε01     |
| C(ν <sub>7</sub> )-H(ν <sub>6</sub> ) | 1,092     | C(ν <sub>7</sub> )-N(ν <sub>5</sub> ) | 1,ε01     | C(ν <sub>7</sub> )-C(ν <sub>8</sub> ) | 1,017     |
| C(ν <sub>6</sub> )-H(ν <sub>5</sub> ) | 1,080     | C(ν <sub>5</sub> )-H(ν <sub>5</sub> ) | 1,086     | C(ν <sub>5</sub> )-C(ν <sub>6</sub> ) | 1,290     |
| C(ν <sub>4</sub> )-H(ν <sub>4</sub> ) | 1,086     | C(ν <sub>4</sub> )-C(ν <sub>5</sub> ) | 1,396     | C(ν <sub>3</sub> )-H(ν <sub>0</sub> ) | 1,086     |
| C(ν <sub>3</sub> )-C(ν <sub>4</sub> ) | 1,396     | C(ν <sub>2</sub> )-H(ν <sub>2</sub> ) | 1,08ε     | C(ν <sub>2</sub> )-C(ν <sub>3</sub> ) | 1,290     |
| C(ν <sub>1</sub> )-C(ν <sub>2</sub> ) | 1,290     | C(ν <sub>1</sub> )-C(ν <sub>6</sub> ) | 1,391     | O(ν <sub>0</sub> )-C(ν <sub>1</sub> ) | 1,299     |
| C(ν <sub>9</sub> )-H(ν <sub>3</sub> ) | 1,082     | C(ν <sub>8</sub> )-H(ν <sub>2</sub> ) | 1,080     | C(ν <sub>8</sub> )-C(ν <sub>9</sub> ) | 1,392     |
| C(ν <sub>7</sub> )-H(ν <sub>1</sub> ) | 1,080     | C(ν <sub>7</sub> )-C(ν <sub>8</sub> ) | 1,396     | C(ν <sub>6</sub> )-H(ν <sub>0</sub> ) | 1,086     |
| C(ν <sub>6</sub> )-C(ν <sub>7</sub> ) | 1,290     | C(ν <sub>5</sub> )-H(ε <sub>9</sub> ) | 1,083     | C(ν <sub>5</sub> )-C(ν <sub>6</sub> ) | 1,297     |
| C(ε <sub>4</sub> )-C(ν <sub>5</sub> ) | 1,393     | C(ε <sub>4</sub> )-C(ν <sub>9</sub> ) | 1,389     | O(ν <sub>3</sub> )-C(ε <sub>4</sub> ) | 1,ε02     |
| P(ν <sub>2</sub> )-C(ν <sub>1</sub> ) | 1,879     | P(ν <sub>2</sub> )-O(ν <sub>0</sub> ) | 1,621     | P(ν <sub>2</sub> )-O(ν <sub>3</sub> ) | 1,623     |
| O(ν <sub>1</sub> )-P(ν <sub>2</sub> ) | 1,ε83     |                                       |           |                                       |           |

**Table S18:** Selected bond angle (°) of **4c**

| Angle             | (°) Degree | Angle             | (°) Degree | Angle             | (°) Degree |
|-------------------|------------|-------------------|------------|-------------------|------------|
| O(ελ)-N(εΓ)-O(εΥ) | 120,910    | O(ελ)-N(εΓ)-C(εο) | 117,917    | O(εΥ)-N(εΓ)-C(εο) | 117,039    |
| N(εΓ)-C(εο)-C(εε) | 110,707    | N(εΓ)-C(εο)-C(εΥ) | 122,083    | C(εε)-C(εο)-C(εΥ) | 121,722    |
| H(νέ)-C(εε)-C(εο) | 120,034    | H(νέ)-C(εε)-C(εο) | 120,814    | C(εο)-C(εε)-C(εο) | 118,741    |
| O(εϛ)-N(ε1)-O(ε2) | 120,037    | O(εϛ)-N(ε1)-C(εο) | 117,728    | O(ε2)-N(ε1)-C(εο) | 117,337    |
| C(εε)-C(εο)-N(ε1) | 119,124    | C(εε)-C(εο)-C(ε9) | 121,019    | N(ε1)-C(εο)-C(ε9) | 119,307    |
| H(νϛ)-C(ε9)-C(εο) | 119,497    | H(νϛ)-C(ε9)-C(ελ) | 121,200    | C(εο)-C(ε9)-C(ελ) | 119,219    |
| H(ν2)-C(ελ)-C(ε9) | 119,989    | H(ν2)-C(ελ)-C(εΥ) | 118,911    | C(ε9)-C(ελ)-C(εΥ) | 121,052    |
| C(ελ)-C(εΥ)-C(εο) | 117,900    | C(ελ)-C(εΥ)-N(εΓ) | 120,338    | C(εο)-C(εΥ)-N(εΓ) | 121,701    |
| C(εΥ)-N(εΓ)-N(εο) | 118,721    | C(εΥ)-N(εΓ)-C(εΓ) | 129,713    | N(εο)-N(εΓ)-C(εΓ) | 111,087    |
| N(εΓ)-N(εο)-C(ελ) | 104,913    | H(ν1)-C(εε)-C(εϛ) | 120,702    | H(ν1)-C(εε)-C(ε9) | 119,002    |
| C(εϛ)-C(εε)-C(ε9) | 120,347    | H(νο)-C(εϛ)-C(εε) | 119,740    | H(νο)-C(εϛ)-C(ε2) | 120,084    |
| C(εε)-C(εϛ)-C(ε2) | 120,277    | H(ε9)-C(ε2)-C(εϛ) | 120,148    | H(ε9)-C(ε2)-C(ε1) | 120,101    |
| C(εϛ)-C(ε2)-C(ε1) | 119,701    | H(ελ)-C(ε1)-C(ε2) | 120,170    | H(ελ)-C(ε1)-C(εο) | 119,702    |
| C(ε2)-C(ε1)-C(εο) | 120,177    | H(εΥ)-C(εο)-C(ε1) | 119,039    | H(εΥ)-C(εο)-C(ε9) | 119,981    |
| C(ε1)-C(εο)-C(ε9) | 120,440    | C(εο)-C(ε9)-C(εε) | 119,007    | C(εο)-C(ε9)-C(ελ) | 120,003    |
| C(εε)-C(ε9)-C(ελ) | 120,383    | N(εο)-C(ελ)-C(ε9) | 120,800    | N(εο)-C(ελ)-C(εΥ) | 111,800    |
| C(ε9)-C(ελ)-C(εΥ) | 127,340    | H(εΓ)-C(εΥ)-C(ελ) | 127,284    | H(εΓ)-C(εΥ)-C(εΓ) | 127,098    |
| C(ελ)-C(εΥ)-C(εΓ) | 100,004    | C(εΥ)-C(εΓ)-N(εΓ) | 107,193    | C(εΥ)-C(εΓ)-N(εο) | 131,070    |
| N(εΓ)-C(εΓ)-N(εο) | 122,737    | H(εο)-N(εο)-C(εΓ) | 110,747    | H(εο)-N(εο)-C(εΥ) | 110,733    |
| C(εΓ)-N(εο)-C(εΥ) | 118,800    | H(εε)-C(εε)-C(εϛ) | 119,411    | H(εε)-C(εε)-C(ελ) | 120,821    |
| C(εϛ)-C(εε)-C(ελ) | 119,733    | H(εϛ)-C(εϛ)-C(εε) | 119,821    | H(εϛ)-C(εϛ)-C(ε2) | 119,374    |
| C(εε)-C(εϛ)-C(ε2) | 120,810    | H(ε2)-C(ε2)-C(εϛ) | 120,479    | H(ε2)-C(ε2)-C(εο) | 120,131    |
| C(εϛ)-C(ε2)-C(εο) | 119,400    | H(ε1)-O(ε1)-C(εο) | 109,020    | C(ε2)-C(εο)-O(ε1) | 123,029    |
| C(ε2)-C(εο)-C(ε9) | 120,043    | O(ε1)-C(εο)-C(ε9) | 117,927    | H(εο)-C(ε9)-C(εο) | 118,008    |
| H(εο)-C(ε9)-C(ελ) | 121,204    | C(εο)-C(ε9)-C(ελ) | 120,227    | C(ε9)-C(ελ)-C(εε) | 119,787    |
| C(ε9)-C(ελ)-C(εΥ) | 118,430    | C(εε)-C(ελ)-C(εΥ) | 121,779    | H(ο9)-C(εΥ)-N(εο) | 107,100    |
| H(ο9)-C(εΥ)-C(ελ) | 107,707    | H(ο9)-C(εΥ)-P(ε2) | 102,803    | N(εο)-C(εΥ)-C(ελ) | 113,820    |
| N(εο)-C(εΥ)-P(ε2) | 110,733    | C(ελ)-C(εΥ)-P(ε2) | 108,932    | H(ολ)-C(εΓ)-C(εο) | 121,877    |
| H(ολ)-C(εΓ)-C(ε1) | 119,404    | C(εο)-C(εΓ)-C(ε1) | 118,719    | H(οΥ)-C(εο)-C(εΓ) | 119,089    |
| H(οΥ)-C(εο)-C(εε) | 120,187    | C(εΓ)-C(εο)-C(εε) | 120,224    | H(οΓ)-C(εε)-C(εο) | 119,907    |
| H(οΓ)-C(εε)-C(εϛ) | 120,017    | C(εο)-C(εε)-C(εϛ) | 120,027    | H(οο)-C(εϛ)-C(εε) | 120,088    |
| H(οο)-C(εϛ)-C(ε2) | 119,043    | C(εε)-C(εϛ)-C(ε2) | 120,378    | H(οε)-C(ε2)-C(εϛ) | 122,074    |
| H(οε)-C(ε2)-C(ε1) | 119,331    | C(εϛ)-C(ε2)-C(ε1) | 118,704    | C(ε2)-C(ε1)-C(εΓ) | 122,008    |
| C(ε2)-C(ε1)-O(εο) | 118,389    | C(εΓ)-C(ε1)-O(εο) | 119,021    | C(ε1)-O(εο)-P(ε2) | 121,777    |
| H(οϛ)-C(ε9)-C(ελ) | 121,173    | H(οϛ)-C(ε9)-C(εε) | 119,043    | C(ελ)-C(ε9)-C(εε) | 119,242    |
| H(ο2)-C(ελ)-C(ε9) | 118,908    | H(ο2)-C(ελ)-C(εΥ) | 121,073    | C(ε9)-C(ελ)-C(εΥ) | 120,008    |
| H(ο1)-C(εΥ)-C(ελ) | 120,100    | H(ο1)-C(εΥ)-C(εΓ) | 120,077    | C(ελ)-C(εΥ)-C(εΓ) | 119,817    |
| H(οο)-C(εΓ)-C(εΥ) | 120,040    | H(οο)-C(εΓ)-C(εο) | 119,008    | C(εΥ)-C(εΓ)-C(εο) | 120,902    |
| H(ε9)-C(εο)-C(εΓ) | 121,708    | H(ε9)-C(εο)-C(εε) | 120,242    | C(εΓ)-C(εο)-C(εε) | 118,043    |
| C(εο)-C(εε)-C(ε9) | 121,971    | C(εο)-C(εε)-O(ε3) | 122,703    | C(ε9)-C(εε)-O(ε3) | 110,407    |
| C(εε)-O(ε3)-P(ε2) | 127,221    | C(εΥ)-P(ε2)-O(εο) | 101,748    | C(εΥ)-P(ε2)-O(εϛ) | 107,721    |
| C(εΥ)-P(ε2)-O(ε1) | 112,093    | O(εο)-P(ε2)-O(εϛ) | 97,040     | O(εο)-P(ε2)-O(ε1) | 117,870    |
| O(εϛ)-P(ε2)-O(ε1) | 117,897    | H(οε)-C(ελ)-C(εΥ) | 120,870    | C(ε9)-C(ελ)-C(εΥ) | 120,008    |
| H(οϛ)-C(εΥ)-C(ελ) | 120,144    | H(οϛ)-C(εΥ)-C(εΓ) | 120,100    | C(ελ)-C(εΥ)-C(εΓ) | 119,817    |
| H(ο2)-C(εΓ)-C(εΥ) | 120,070    | H(ο2)-C(εΓ)-C(εο) | 118,987    | C(εΥ)-C(εΓ)-C(εο) | 120,902    |
| H(ο1)-C(εο)-C(εΓ) | 121,478    | H(ο1)-C(εο)-C(εε) | 120,443    | C(εΓ)-C(εο)-C(εε) | 118,043    |
| C(εο)-C(εε)-C(ε9) | 121,971    | C(εο)-C(εε)-O(ε3) | 122,703    | C(ε9)-C(εε)-O(ε3) | 110,407    |
| C(εε)-O(ε3)-P(ε2) | 127,221    | C(εΥ)-P(ε2)-O(εο) | 101,748    | C(εΥ)-P(ε2)-O(εϛ) | 107,721    |
| C(εΥ)-P(ε2)-O(ε1) | 112,093    | O(εο)-P(ε2)-O(εϛ) | 97,040     | O(εο)-P(ε2)-O(ε1) | 117,870    |
| O(εϛ)-P(ε2)-O(ε1) | 117,897    |                   |            |                   |            |

**Table S19:** Selected bond length (Å) of **4d**

| Bond        | Length(Å) | Bond        | Length(Å) | Bond        | Length(Å) |
|-------------|-----------|-------------|-----------|-------------|-----------|
| N(ελ)-O(οο) | 1,220     | N(ελ)-O(ε9) | 1,227     | C(εγ)-N(ελ) | 1,εγ7     |
| C(ε7)-H(λ1) | 1,082     | C(ε7)-C(εγ) | 1,387     | N(ε3)-O(εο) | 1,230     |
| N(ε3)-O(εε) | 1,230     | C(ε2)-C(ε7) | 1,390     | C(ε2)-N(ε3) | 1,ε79     |
| C(ε1)-H(λ0) | 1,083     | C(ε1)-C(ε2) | 1,393     | C(ε0)-H(γ9) | 1,083     |
| C(ε0)-C(ε1) | 1,387     | C(39)-C(ε0) | 1,ε07     | C(39)-C(εγ) | 1,ε10     |
| N(3λ)-C(39) | 1,390     | N(3γ)-N(3λ) | 1,379     | C(37)-H(γλ) | 1,080     |
| C(3ο)-H(γγ) | 1,087     | C(3ο)-C(37) | 1,392     | C(3ε)-H(γ7) | 1,087     |
| C(3ε)-C(3ο) | 1,397     | C(33)-H(γο) | 1,087     | C(33)-C(3ε) | 1,397     |
| C(32)-H(γε) | 1,080     | C(32)-C(33) | 1,393     | C(31)-C(32) | 1,ε03     |
| C(31)-C(37) | 1,ε03     | C(30)-N(3γ) | 1,320     | C(30)-C(31) | 1,ε77     |
| C(29)-H(γ3) | 1,077     | C(29)-C(30) | 1,ε20     | C(2λ)-C(29) | 1,370     |
| C(2λ)-N(3λ) | 1,387     | N(2γ)-H(γ2) | 1,010     | N(2γ)-C(2λ) | 1,388     |
| C(27)-H(γ1) | 1,087     | C(2ο)-H(γ0) | 1,082     | C(2ο)-C(27) | 1,380     |
| C(2ε)-H(79) | 1,098     | C(2ε)-H(7λ) | 1,099     | C(2ε)-H(7γ) | 1,091     |
| C(23)-H(77) | 1,098     | C(23)-H(7ο) | 1,101     | C(23)-H(7ε) | 1,091     |
| N(22)-C(2ε) | 1,ε03     | N(22)-C(23) | 1,εε9     | C(21)-C(2ο) | 1,ε1ε     |
| C(21)-N(22) | 1,381     | C(20)-H(73) | 1,083     | C(20)-C(21) | 1,ε1ε     |
| C(19)-H(72) | 1,087     | C(19)-C(20) | 1,392     | C(1λ)-C(19) | 1,390     |
| C(1λ)-C(27) | 1,ε02     | C(1γ)-H(71) | 1,093     | C(1γ)-N(2γ) | 1,ε0ε     |
| C(1γ)-C(1λ) | 1,010     | C(17)-H(70) | 1,082     | C(1ο)-H(ο9) | 1,087     |
| C(1ο)-C(17) | 1,39ε     | C(1ε)-H(ολ) | 1,087     | C(1ε)-C(1ο) | 1,397     |
| C(13)-H(ογ) | 1,087     | C(13)-C(1ε) | 1,397     | C(12)-H(ο7) | 1,083     |
| C(12)-C(13) | 1,393     | C(11)-C(12) | 1,391     | C(11)-C(17) | 1,390     |
| O(10)-C(11) | 1,397     | C(9)-H(οο)  | 1,081     | C(λ)-H(οε)  | 1,080     |
| C(λ)-C(9)   | 1,392     | C(γ)-H(ο3)  | 1,087     | C(γ)-C(λ)   | 1,397     |
| C(7)-H(ο2)  | 1,087     | C(7)-C(γ)   | 1,390     | C(ο)-H(ο1)  | 1,082     |
| C(ο)-C(7)   | 1,398     | C(ε)-C(ο)   | 1,393     | C(ε)-C(9)   | 1,390     |
| O(3)-C(ε)   | 1,ε02     | P(γ)-C(1γ)  | 1,882     | P(γ)-O(10)  | 1,729     |
| P(γ)-O(3)   | 1,710     | O(1)-P(γ)   | 1,ε80     |             |           |



**Table S20:** Selected bond angle (°) of 4d

| Angle             | (°) Degree | Angle             | (°) Degree | Angle             | (°) Degree |
|-------------------|------------|-------------------|------------|-------------------|------------|
| O(00)-N(08)-O(09) | 120,704    | O(00)-N(08)-C(07) | 117,872    | O(09)-N(08)-C(07) | 117,231    |
| N(08)-C(07)-C(06) | 110,700    | N(08)-C(07)-C(09) | 122,090    | C(06)-C(07)-C(09) | 121,709    |
| H(01)-C(06)-C(07) | 120,008    | H(01)-C(06)-C(02) | 120,828    | C(07)-C(06)-C(02) | 118,747    |
| O(05)-N(03)-O(04) | 124,908    | O(05)-N(03)-C(02) | 117,737    | O(04)-N(03)-C(02) | 117,407    |
| C(06)-C(02)-N(03) | 119,124    | C(06)-C(02)-C(01) | 121,477    | N(03)-C(02)-C(01) | 119,409    |
| H(00)-C(01)-C(02) | 119,470    | H(00)-C(01)-C(00) | 121,202    | C(02)-C(01)-C(00) | 119,238    |
| H(09)-C(00)-C(01) | 120,072    | H(09)-C(00)-C(09) | 118,820    | C(01)-C(00)-C(09) | 121,042    |
| C(00)-C(09)-C(07) | 117,912    | C(00)-C(09)-N(08) | 120,298    | C(07)-C(09)-N(08) | 121,729    |
| C(09)-N(08)-N(03) | 118,879    | C(09)-N(08)-C(02) | 129,442    | N(03)-N(08)-C(02) | 111,707    |
| N(08)-N(03)-C(00) | 104,840    | H(07)-C(06)-C(00) | 120,724    | H(07)-C(06)-C(01) | 119,022    |
| C(00)-C(06)-C(01) | 120,204    | H(07)-C(00)-C(06) | 119,720    | H(07)-C(00)-C(04) | 120,077    |
| C(06)-C(00)-C(04) | 120,203    | H(06)-C(05)-C(00) | 120,101    | H(06)-C(05)-C(03) | 120,087    |
| C(00)-C(04)-C(03) | 119,811    | H(05)-C(03)-C(04) | 120,108    | H(05)-C(03)-C(02) | 119,747    |
| C(04)-C(03)-C(02) | 120,191    | H(04)-C(02)-C(03) | 119,797    | H(04)-C(02)-C(01) | 120,022    |
| C(03)-C(02)-C(01) | 120,230    | C(02)-C(01)-C(06) | 119,301    | C(02)-C(01)-C(00) | 120,000    |
| C(06)-C(01)-C(00) | 120,730    | N(03)-C(00)-C(01) | 121,343    | N(03)-C(00)-C(09) | 111,839    |
| C(01)-C(00)-C(09) | 127,787    | H(03)-C(09)-C(00) | 127,049    | H(03)-C(09)-C(02) | 127,379    |
| C(00)-C(09)-C(02) | 100,488    | C(09)-C(02)-N(08) | 107,213    | C(09)-C(02)-N(03) | 131,270    |
| N(08)-C(02)-N(03) | 122,013    | H(02)-N(03)-C(02) | 113,704    | H(02)-N(03)-C(01) | 113,240    |
| C(02)-N(03)-C(01) | 117,011    | H(01)-C(06)-C(00) | 118,880    | H(01)-C(06)-C(01) | 119,470    |
| C(00)-C(06)-C(01) | 121,079    | H(00)-C(00)-C(06) | 118,398    | H(00)-C(00)-C(04) | 120,704    |
| C(06)-C(00)-C(04) | 120,979    | H(09)-C(04)-H(08) | 108,238    | H(09)-C(04)-H(07) | 107,712    |
| H(09)-C(04)-N(03) | 111,979    | H(08)-C(04)-H(07) | 108,021    | H(08)-C(04)-N(03) | 111,443    |
| H(07)-C(04)-N(03) | 109,310    | H(06)-C(03)-H(05) | 107,849    | H(06)-C(03)-H(04) | 107,721    |
| H(06)-C(03)-N(03) | 111,002    | H(05)-C(03)-H(04) | 107,998    | H(05)-C(03)-N(03) | 112,274    |
| H(04)-C(03)-N(03) | 109,387    | C(04)-N(03)-C(02) | 119,870    | C(04)-N(03)-C(01) | 119,071    |
| C(03)-N(03)-C(01) | 119,883    | C(00)-C(01)-N(03) | 121,177    | C(00)-C(01)-C(00) | 117,092    |
| N(03)-C(01)-C(00) | 121,720    | H(03)-C(00)-C(01) | 120,449    | H(03)-C(00)-C(09) | 118,470    |
| C(01)-C(00)-C(09) | 121,043    | H(02)-C(09)-C(00) | 118,330    | H(02)-C(09)-C(01) | 120,307    |
| C(00)-C(09)-C(01) | 121,371    | C(09)-C(01)-C(06) | 117,718    | C(09)-C(01)-C(07) | 123,414    |
| C(06)-C(01)-C(07) | 118,021    | H(01)-C(07)-N(03) | 107,780    | H(01)-C(07)-C(01) | 108,700    |
| H(01)-C(07)-P(02) | 103,737    | N(03)-C(07)-C(01) | 114,108    | N(03)-C(07)-P(02) | 114,147    |
| C(01)-C(07)-P(02) | 107,700    | H(00)-C(06)-C(01) | 121,491    | H(00)-C(06)-C(01) | 119,894    |
| C(00)-C(06)-C(01) | 118,704    | H(09)-C(05)-C(06) | 119,112    | H(09)-C(05)-C(04) | 120,110    |
| C(06)-C(05)-C(04) | 120,777    | H(08)-C(04)-C(05) | 120,170    | H(08)-C(04)-C(03) | 120,210    |
| C(00)-C(04)-C(03) | 119,718    | H(07)-C(03)-C(04) | 120,207    | H(07)-C(03)-C(02) | 119,422    |
| C(04)-C(03)-C(02) | 120,319    | H(06)-C(02)-C(03) | 121,787    | H(06)-C(02)-C(01) | 119,100    |
| C(03)-C(02)-C(01) | 119,201    | C(02)-C(01)-C(06) | 121,472    | C(02)-C(01)-O(00) | 117,042    |
| C(06)-C(01)-O(00) | 121,918    | C(01)-O(00)-P(02) | 120,079    | H(00)-C(09)-C(08) | 121,270    |
| H(00)-C(09)-C(08) | 119,413    | C(08)-C(09)-C(08) | 119,204    | H(04)-C(08)-C(09) | 118,982    |
| H(04)-C(08)-C(09) | 120,870    | C(09)-C(08)-C(07) | 120,141    | H(03)-C(07)-C(08) | 120,144    |
| H(03)-C(07)-C(08) | 120,100    | C(08)-C(07)-C(06) | 119,700    | H(02)-C(06)-C(07) | 120,070    |
| H(02)-C(06)-C(07) | 118,987    | C(07)-C(06)-C(00) | 120,948    | H(01)-C(05)-C(06) | 121,478    |
| H(01)-C(05)-C(06) | 120,443    | C(06)-C(05)-C(04) | 118,081    | C(05)-C(04)-C(09) | 121,914    |
| C(05)-C(04)-O(03) | 122,993    | C(09)-C(04)-O(03) | 110,078    | C(04)-O(03)-P(02) | 128,200    |
| C(07)-P(02)-O(01) | 104,732    | C(07)-P(02)-O(03) | 107,707    | C(07)-P(02)-O(01) | 112,101    |
| O(01)-P(02)-O(03) | 90,129     | O(01)-P(02)-O(01) | 117,748    | O(03)-P(02)-O(01) | 118,001    |
